# Supplementary material for: Synthesis of mesoporous iridium nanosponge: a highly active, thermally stable and efficient olefin hydrogenation catalyst
Source: Royal Society of Chemistry journal article supplement (doi:10.1039/c7dt01358b), 2017-01-01

# Synthesis of mesoporous iridium nanosponge: A highly active, thermally stable and efficient olefin hydrogenation catalyst

Sourav Ghosh, Balaji R. Jagirdar\*

*Department of Inorganic and Physical Chemistry, Indian Institute of Science, Bangalore, Karnataka-560012, India*

Email address: [jagirdar@ipc.iisc.ernet.in](mailto:jagirdar@ipc.iisc.ernet.in)

## Table of contents

|                                                                                                                                                                                                                                                                                              |       |
|----------------------------------------------------------------------------------------------------------------------------------------------------------------------------------------------------------------------------------------------------------------------------------------------|-------|
| <b>Figure S1.</b> Experimental Section: Turn over frequency calculation and H <sub>2</sub> -TPD experimental details including H <sub>2</sub> -TPD profile of iridium nanosponge, determination of surface exposed iridium metal.....                                                        | S2-S4 |
| <b>Table S1.</b> Hydrogenation of alkenes at different temperatures .....                                                                                                                                                                                                                    | S5    |
| <b>Table S2.</b> Hydrogenation of 4-vinylcyclohexene by iridium nanosponge .....                                                                                                                                                                                                             | S5    |
| <b>Figure S2.</b> BF TEM images of iridium nanosponge annealed at a) 150 °C for 3 h and b) 300 °C for 3 h, c) powder XRD stack plot of annealed sample with as prepared sample .....                                                                                                         | S6    |
| <b>Table S3.</b> Hydrogenation of styrene using iridium nanosponge annealed at different temperatures .....                                                                                                                                                                                  | S6    |
| <b>Figure S3.</b> a) BF-TEM image, b) HRTEM image, c) powder XRD stack plot of Ir@BNH <sub>x</sub> polymer and iridium nanosponge, and d) FTIR spectra of iridium nanoparticle stabilized by BNH <sub>x</sub> polymer (Ir@BNH <sub>x</sub> ) synthesized from [Ir(COD)Cl] <sub>2</sub> ..... | S7    |
| <b>Figure S4.</b> a) SEM image, b) BF TEM image, c) HRTEM image, d) PXRD pattern, e) FT-IR spectral comparison plot, f) STEM HAADF image (scale bar 1 micron) and g) STEM EDS elemental mapping (scale bar 1 micron) of iridium nanosponge synthesized from IrCl <sub>3</sub> .....          | S7    |
| <b>Figure S5.</b> a) SEM image, b) BF TEM image, c) HRTEM image, d) PXRD pattern, e) FT-IR spectral comparison plot, f) STEM BF image (scale bar 600 nm) and g) STEM EDS                                                                                                                     |       |

|                                                                                                                                                                                 |         |
|---------------------------------------------------------------------------------------------------------------------------------------------------------------------------------|---------|
| elemental mapping (scale bar 600 nm) of iridium nanosponge synthesized from [Ir(COD)Cl] <sub>2</sub> .....                                                                      | S8      |
| <b>Figure S6.</b> BET isotherms of iridium nanosponge synthesized from a) IrCl <sub>3</sub> and b) [Ir(COD)Cl] <sub>2</sub> .....                                               | S8      |
| <b>Table S4.</b> Hydrogenation of styrene using iridium nanosponge prepared from different iridium precursors .....                                                             | S9      |
| <b>Table S5.</b> Surface area, pore size, and pore volume of iridium nanosponges synthesized from different iridium precursors .....                                            | S9      |
| <b>Figure S7.</b> PXRD stack plot of dried filtrates obtained after the hydrolysis reaction of three different Ir@BNH <sub>x</sub> nanocomposites .....                         | S10     |
| <b>Figure S8.</b> FT-IR spectral stack plot of dried filtrates obtained after the hydrolysis reaction of three different Ir@BNH <sub>x</sub> nanocomposites .....               | S10     |
| <b>Figure S9.</b> <sup>11</sup> B NMR spectral stack plot of dried filtrates obtained after the hydrolysis reaction of three different Ir@BNH <sub>x</sub> nanocomposites ..... | S11     |
| <b>Figure S10.</b> FT-IR spectrum of iridium nanosponge treated with CO .....                                                                                                   | S11     |
| <b>GC-MS and <sup>1</sup>H NMR spectral plots</b> .....                                                                                                                         | S12-S52 |

---

## ***EXPERIMENTAL SECTION***

### ***Turnover frequency calculation and H<sub>2</sub>-TPD experiment***

Temperature programmed desorption (H<sub>2</sub>-TPD) experiment was performed with a multipurpose unit coupled to a quadrupole mass spectrometer (BELCAT II catalyst analyser, Japan). The H<sub>2</sub>-TPD profile was given below (Fig. S1). It contains two peaks, one at 170 °C and other one appears at 395 °C. The first peak at 170 °C could be ascribed to desorption of weakly bound hydrogen from the metal surface whereas, broad peak at 395 °C refers to the strongly bound hydrogen on metallic iridium.

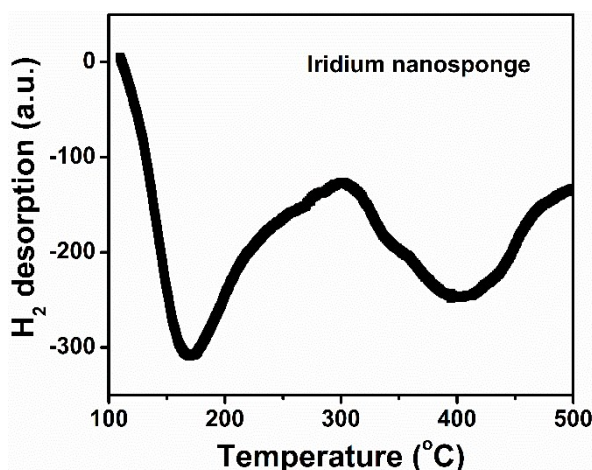

**Figure S1.** H<sub>2</sub>-TPD profile of iridium nanosponge.

Based on the BET surface area data and H<sub>2</sub>-TPD profile, we have calculated the fraction of iridium site is exposed for catalysis. Few assumptions were made for the calculation which are:

1. Since, iridium nanosponge is mesoporous in nature, then all the exposed iridium atoms takes part in the catalysis step. There is no hindered diffusion as the pore size varies between 5-100 nm with a peak centered at 27.7 nm (Fig. 1g; main manuscript).
2. The iridium lattice possess FCC (face-centred cubic) crystal structure. According to the surface energy value, the most atomically dense lattice plane (111) is having lowest surface energy among the other lattice planes ((110) and (100)). We assume that, only (111) lattice plane which is having lowest surface energy is exposed for iridium.

The FCC unit cell edge length for iridium is 3.833 Å.

The area occupied by (111) lattice plane of a FCC lattice is =  $\frac{a^2 \times \sqrt{3}}{2}$ , where  $a$  is the unit cell edge length (3.833 Å). The area was calculated to be  $1.2724 \times 10^{-19} \text{ m}^2$ . The total occupancy for (111) lattice plane for a FCC system is 2 atom.

Therefore,  $1.2724 \times 10^{-19} \text{ m}^2$  of surface area contains 2 atoms;

33.5 m<sup>2</sup>/g (BET surface area) contains  $3.8668 \times 10^{20}$  atoms.

1 gm of iridium, with a surface area of 33.5 m<sup>2</sup>/g have  $3.86668 \times 10^{20}$  atoms exposed. Upon dividing with Avogadro's number ( $N_A = 6.022 \times 10^{23} \text{ mol}^{-1}$ ), 1 gm of iridium nanosponge was found to have 0.8734 mmol of iridium exposed.

Deconvolution of H<sub>2</sub>-TPD profile shows that, 0.337 mmol/g of hydrogen (which is strongly bound to the iridium surface) was desorbed from the iridium nanosponge. Since, each iridium atom can bind with single hydrogen atom [ $\text{Ir (s)} + \frac{1}{2} \text{H}_2 \text{ (g)} = \text{IrH (s)}$ ], then 0.674 mmol ( $2 \times 0.337 \text{ mmol}$ ) of hydrogen atom was actually bound with the iridium metal. Now, assuming 1:1 stoichiometric binding of iridium and hydrogen, the exposed iridium atom concentration was calculated to be 0.674 mmol for 1 gm of iridium. But, from BET surface area measurement, the exposed iridium concentration was measured to be 0.8734 mmol for 1 gm of iridium. The lower value obtained from H<sub>2</sub>-TPD experiment could be attributed to the fact that, all the iridium surface was not covered by (111) lattice plane. There are low density planes such as (110) and (100) present at the surfaces which causes decrement in the amount of hydrogen adsorption.

Turnover frequency was calculated on the basis of total iridium atom exposed (obtained from H<sub>2</sub>-TPD experiment).

**Turnover frequency (TOF)** = moles of substrate transformed per mole of iridium per hour (for total metal)

### **Determination of concentration of surface exposed iridium metal**

H<sub>2</sub>-TPD study reveals that, 0.674 mmol of iridium is exposed at the surface per gram of iridium. Since, 0.05 mol% (0.01 mmol) iridium catalyst is the optimized catalyst concentration used for most of the hydrogenation reactions, the concentration of the surface exposed iridium was calculated for this particular concentration.

5.2 mmol (1 gm) of iridium has 0.674 mmol of surface exposed iridium atoms.

Then, 0.01 mmol of iridium has  $\frac{0.674 \times 0.01}{5.2} = 0.0013$  mmol of surface exposed iridium atoms.

Therefore, the surface atoms exposed for 0.01 mmol of iridium is  $(0.0013/0.01) = 13 \%$ .

**In parenthesis; Turnover frequency (TOF)** = moles of substrate transformed per mole of exposed iridium per hour (for exposed metal)

**Table S1.** Hydrogenation of alkenes at different temperatures

| Entry | Substrate    | Solvent                         | T (°C) | Time (h) | Conv. (%) <sup>a</sup> | TOF (h <sup>-1</sup> ) <sup>b</sup> |
|-------|--------------|---------------------------------|--------|----------|------------------------|-------------------------------------|
| 1     | Styrene      | CH <sub>2</sub> Cl <sub>2</sub> | 30     | 4        | >99                    | 500 (3846)                          |
| 2     | Styrene      | n-heptane                       | 30     | 1.75     | >99                    | 1143 (8791)                         |
| 3     | Styrene      | n-heptane                       | 50     | 0.75     | >99                    | 2667 (20512)                        |
| 4     | Styrene      | n-heptane                       | 75     | 0.42     | >99                    | 4762 (36630)                        |
| 5     | Cyclohexene  | CH <sub>2</sub> Cl <sub>2</sub> | 30     | 4        | >99                    | 500 (3846)                          |
| 6     | Cyclohexene  | n-heptane                       | 75     | 0.4      | >99                    | 5000 (38461)                        |
| 7     | 1-Hexadecene | CH <sub>2</sub> Cl <sub>2</sub> | 30     | 6        | >99                    | 333 (2564)                          |
| 8     | 1-Hexadecene | n-heptane                       | 75     | 0.3      | >99                    | 6667 (51282)                        |

Substrate/iridium catalyst ratio was 2000 and 4 bar hydrogen gas pressure was maintained for all the reactions; <sup>a</sup>conversion determined by GC/MS analysis; <sup>b</sup>turnover frequency = mol (alkene)/mol (Ir nanosponge)·h based on total metal, in parenthesis based on available surface atoms of catalyst.

**Table S2.** Hydrogenation of 4-vinylcyclohexene by iridium nanosponge

| Entry | Substrate          | Time (h) | Conv. (%) <sup>a</sup> | TOF (h <sup>-1</sup> ) <sup>b</sup> | Product           |
|-------|--------------------|----------|------------------------|-------------------------------------|-------------------|
| 1     | 4-Vinylcyclohexene | 3        | 26.5 <sup>c</sup>      | 177 (1359)                          | Ethyl cyclohexane |
| 2     | 4-Vinylcyclohexene | 6        | 58.3 <sup>c</sup>      | 194 (1495)                          | Ethyl cyclohexane |

All reactions were carried out at a constant temperature of 30 °C and constant hydrogen gas pressure of 4 bar in CH<sub>2</sub>Cl<sub>2</sub>; <sup>a</sup>conversion determined by GC/MS analysis, <sup>b</sup>turnover frequency = mol (ethyl cyclohexane)/mol (Ir nanosponge) h, in parenthesis based on available surface atoms of catalyst; <sup>c</sup>conversion of 4-vinylcyclohexene to ethylcyclohexane.

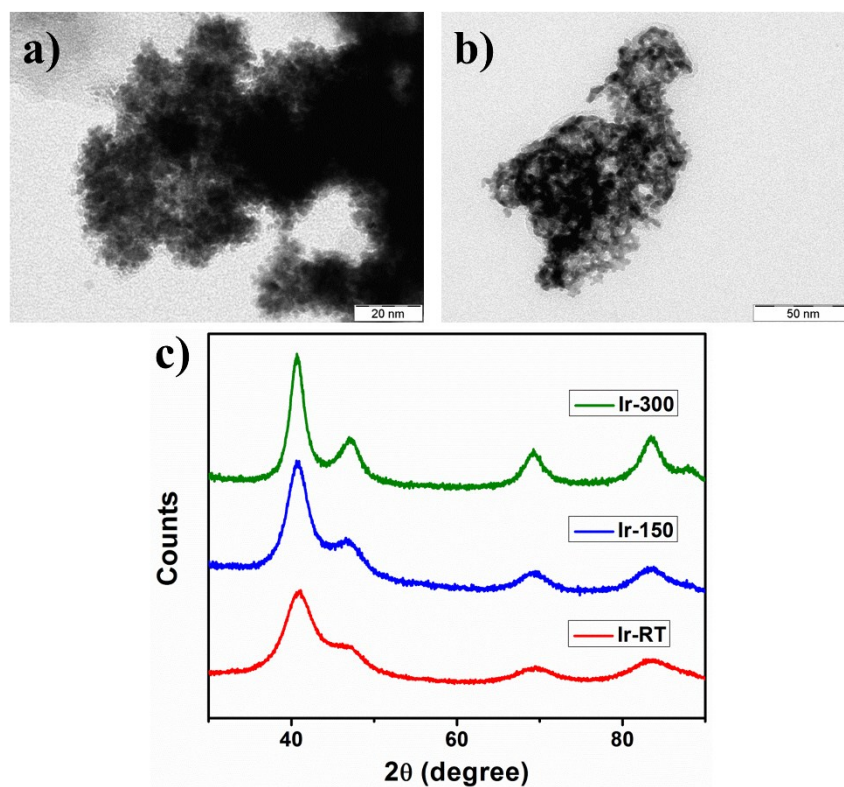

**Figure S2.** BF TEM images of iridium nanosponge annealed at a) 150 °C for 3 h and b) 300 °C for 3 h, c) powder XRD stack plot of annealed sample with as prepared sample.

**Table S3.** Hydrogenation of styrene using iridium nanosponge annealed at different temperatures

| Entry | Catalyst           | Time (h) | Conversion (%) <sup>a</sup> | TOF (h <sup>-1</sup> ) <sup>b</sup> |
|-------|--------------------|----------|-----------------------------|-------------------------------------|
| 1     | Ir-RT <sup>c</sup> | 4        | >99                         | 500                                 |
| 2     | Ir-150             | 4        | >99                         | 500                                 |

All reactions were carried out at fixed styrene/iridium catalyst ratio of 2000 (20 mmol of styrene and 0.01 mmol of iridium nanosponge), 4 bar of hydrogen gas pressure, and at 30 °C in CH<sub>2</sub>Cl<sub>2</sub>; <sup>a</sup>conversion determined by GC/MS analysis; <sup>b</sup>turnover frequency = mol (product)/mol (Ir nanosponge)-h; <sup>c</sup>Iridium nanosponge as prepared sample (without any heat treatment).

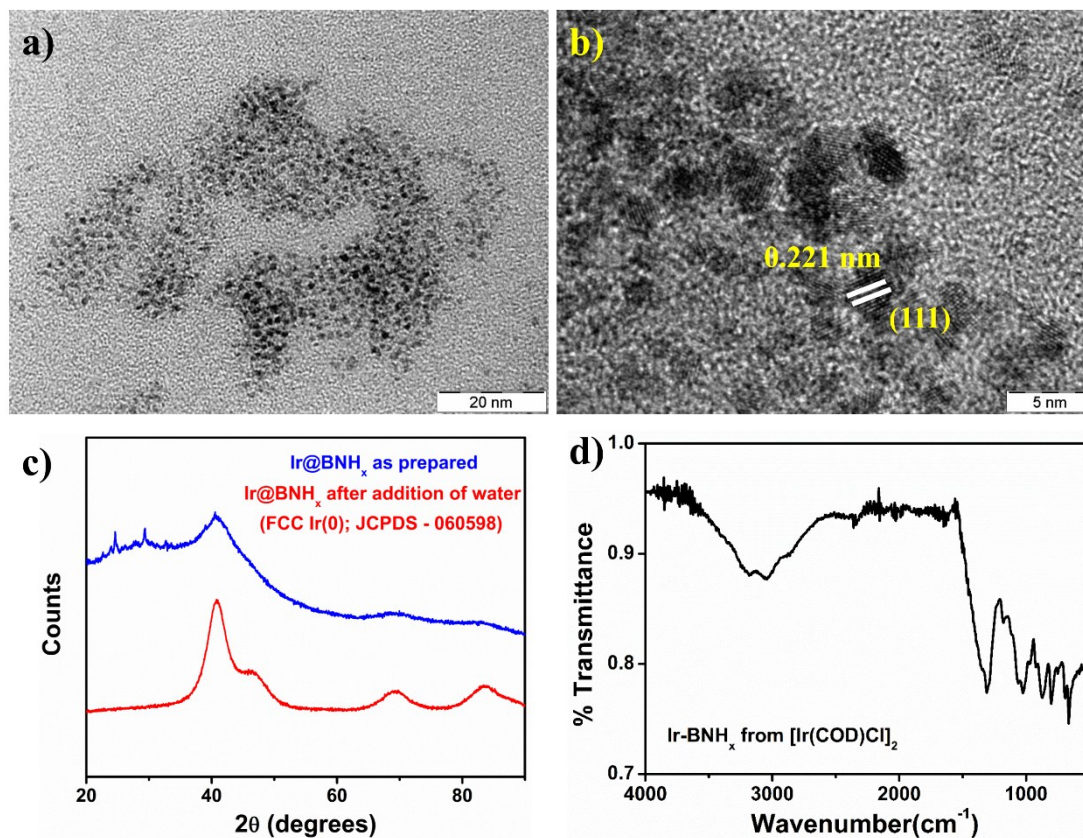

**Figure S3.** a) BF-TEM image, b) HRTEM image, c) powder XRD stack plot of Ir@BNH<sub>x</sub> polymer and iridium nanosponge, and d) FTIR spectra of iridium nanoparticle stabilized by BNH<sub>x</sub> polymer (Ir@BNH<sub>x</sub>) synthesized from [Ir(COD)Cl]<sub>2</sub>.

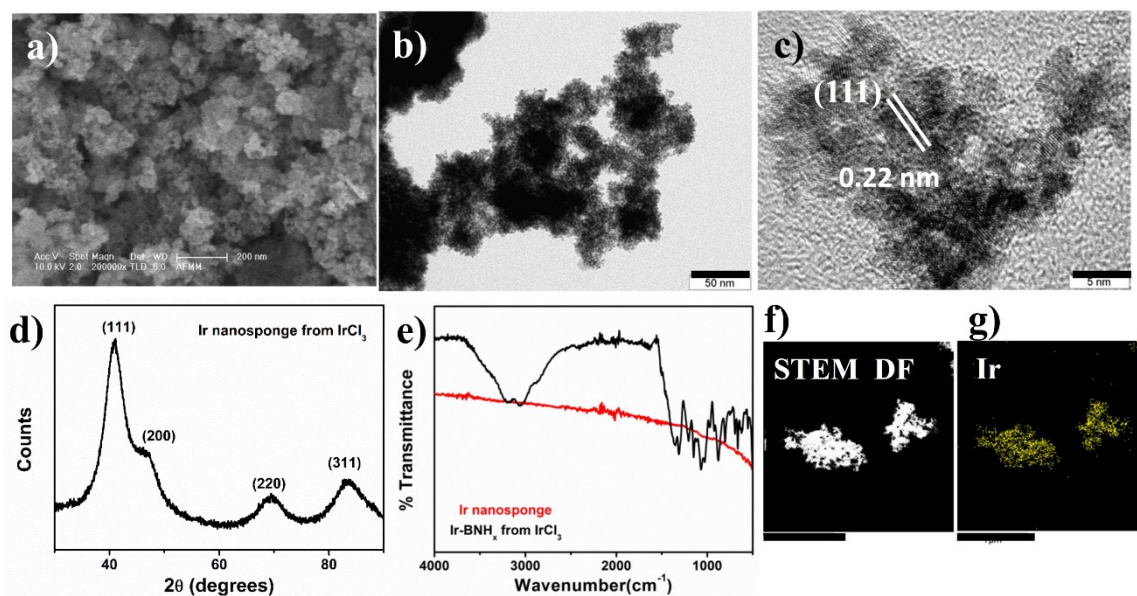

**Figure S4.** a) SEM image, b) BF TEM image, c) HRTEM image, d) PXRD pattern, e) FT-IR spectral comparison plot, f) STEM HAADF image (scale bar 1 micron) and g) STEM EDS elemental mapping (scale bar 1 micron) of iridium nanosponge synthesized from  $\text{IrCl}_3$ .

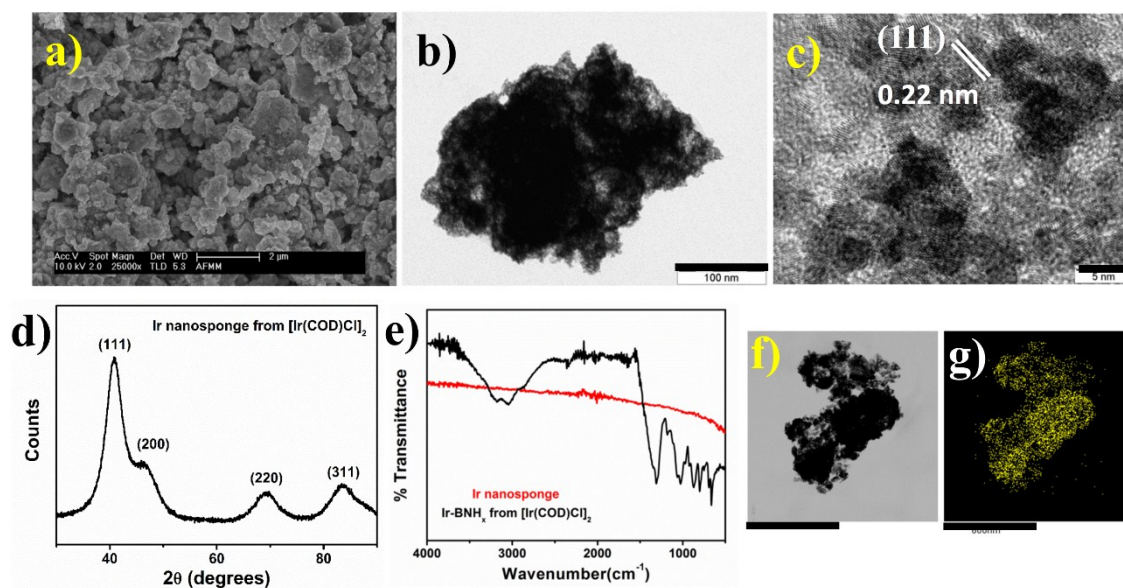

**Figure S5.** a) SEM image, b) BF TEM image, c) HRTEM image, d) PXRD pattern, e) FT-IR spectral comparison plot, f) STEM BF image (scale bar 600 nm) and g) STEM EDS elemental mapping (scale bar 600 nm) of iridium nanosponge synthesized from  $[\text{Ir}(\text{COD})\text{Cl}]_2$ .



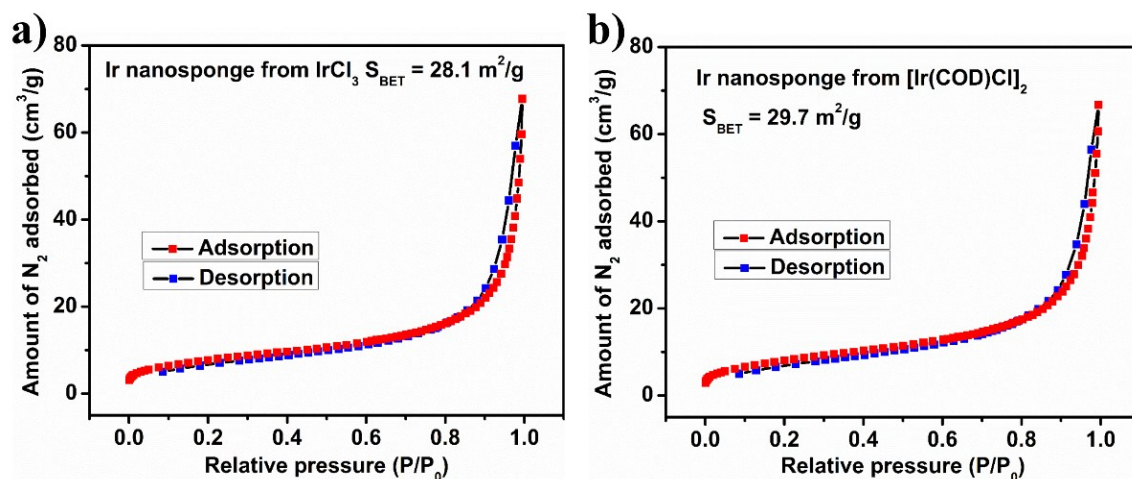

**Figure S6.** BET isotherms of iridium nanosponge synthesized from a)  $\text{IrCl}_3$  and b)  $[\text{Ir}(\text{COD})\text{Cl}]_2$ .

**Table S4.** Hydrogenation of styrene using iridium nanosponge prepared from different iridium precursors

| Entry | Styrene/catalyst | Catalyst          | Time (h)       | Conversion (%) <sup>a</sup> | TOF ( $\text{h}^{-1}$ ) <sup>b</sup> |
|-------|------------------|-------------------|----------------|-----------------------------|--------------------------------------|
| 1     | 2000             | Ir-1 <sup>c</sup> | 1 <sup>f</sup> | 53.6 <sup>f</sup>           | 1072                                 |
| 2     | 2000             | Ir-1 <sup>c</sup> | 4              | >99                         | 500                                  |
| 3     | 2000             | Ir-2 <sup>d</sup> | 1 <sup>f</sup> | 53.9 <sup>f</sup>           | 1078                                 |
| 4     | 2000             | Ir-2 <sup>d</sup> | 4              | >99                         | 500                                  |
| 5     | 2000             | Ir-3 <sup>e</sup> | 1 <sup>f</sup> | 53.4 <sup>f</sup>           | 1068                                 |
| 6     | 2000             | Ir-3 <sup>e</sup> | 4              | >99                         | 500                                  |

All reactions were carried out at 4 bar hydrogen gas pressure and at 30 °C in  $\text{CH}_2\text{Cl}_2$ ; <sup>a</sup>conversion determined by GC/MS analysis; <sup>b</sup>turnover frequency = mol (styrene)/mol (Ir nanosponge) h; <sup>c</sup>iridium catalyst prepared from  $\text{H}_2\text{IrCl}_6$ ; <sup>d</sup>iridium catalyst prepared from  $\text{IrCl}_3 \cdot x\text{H}_2\text{O}$ ; <sup>e</sup>iridium catalyst prepared from  $[\text{Ir}(1,5\text{-COD})\text{Cl}]_2$ ; <sup>f</sup>reaction was stopped after 1 h and aliquot was drawn for  $^1\text{H-NMR}$  and GC-MS study, % styrene converted to ethyl benzene.

**Table S5.** Surface area, pore size, and pore volume of iridium nanosponges synthesized from different iridium precursors

| Entry | Materials                                    | $S_{\text{BET}}$ ( $\text{m}^2/\text{g}$ ) | Pore size (nm) | Pore volume ( $\text{cm}^3/\text{g}$ ) |
|-------|----------------------------------------------|--------------------------------------------|----------------|----------------------------------------|
| 1     | Ir from $\text{H}_2\text{IrCl}_6$            | 33.5                                       | 27.7           | 0.245                                  |
| 2     | Ir from $\text{IrCl}_3$                      | 28.1                                       | 16.7           | 0.104                                  |
| 3     | Ir from $[\text{Ir}(\text{COD})\text{Cl}]_2$ | 29.7                                       | 16.2           | 0.102                                  |

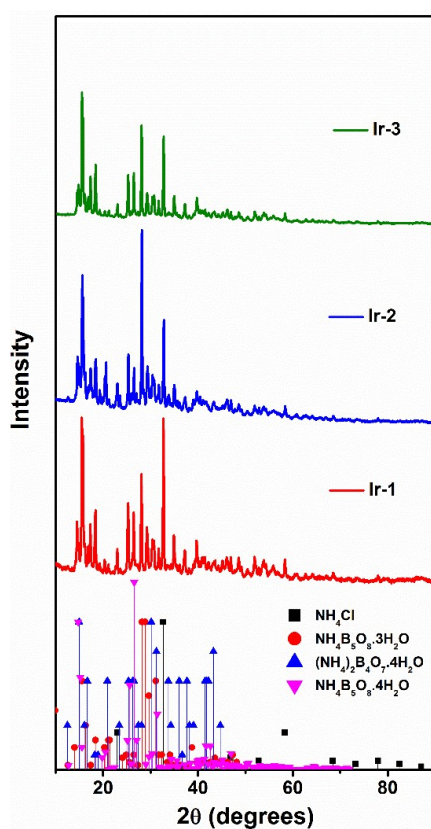

**Figure S7.** PXR D stack plot of dried filtrates obtained after the hydrolysis reaction of three different  $\text{Ir}@\text{BNH}_x$  nanocomposite. The iridium precursors used for synthesis of  $\text{Ir}@\text{BNH}_x$  nanocomposite are Ir-1:  $\text{H}_2\text{IrCl}_6$ , Ir-2:  $\text{IrCl}_3$ , and Ir-3:  $[\text{Ir}(\text{COD})\text{Cl}]_2$ . JCPDS card number:

NH<sub>4</sub>Cl: 07-0007; (NH<sub>4</sub>)<sub>2</sub>B<sub>4</sub>O<sub>7</sub>·4H<sub>2</sub>O: 19-0061; NH<sub>4</sub>B<sub>5</sub>O<sub>8</sub>·4H<sub>2</sub>O: 74-1233; NH<sub>4</sub>B<sub>5</sub>O<sub>8</sub>·3H<sub>2</sub>O: 12-0637.

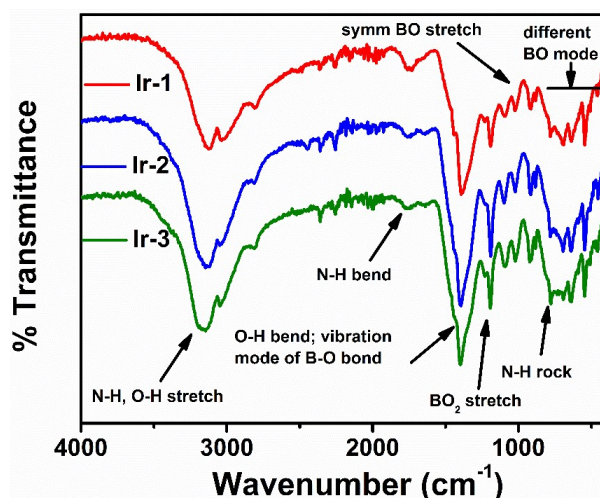

**Figure S8.** FT-IR spectral stack plot of dried filtrates obtained after the hydrolysis reaction of three different Ir@BNH<sub>x</sub> nanocomposite. The iridium precursors used for synthesis of Ir@BNH<sub>x</sub> nanocomposite are Ir-1: H<sub>2</sub>IrCl<sub>6</sub>, Ir-2: IrCl<sub>3</sub>, and Ir-3: [Ir(COD)Cl]<sub>2</sub>.

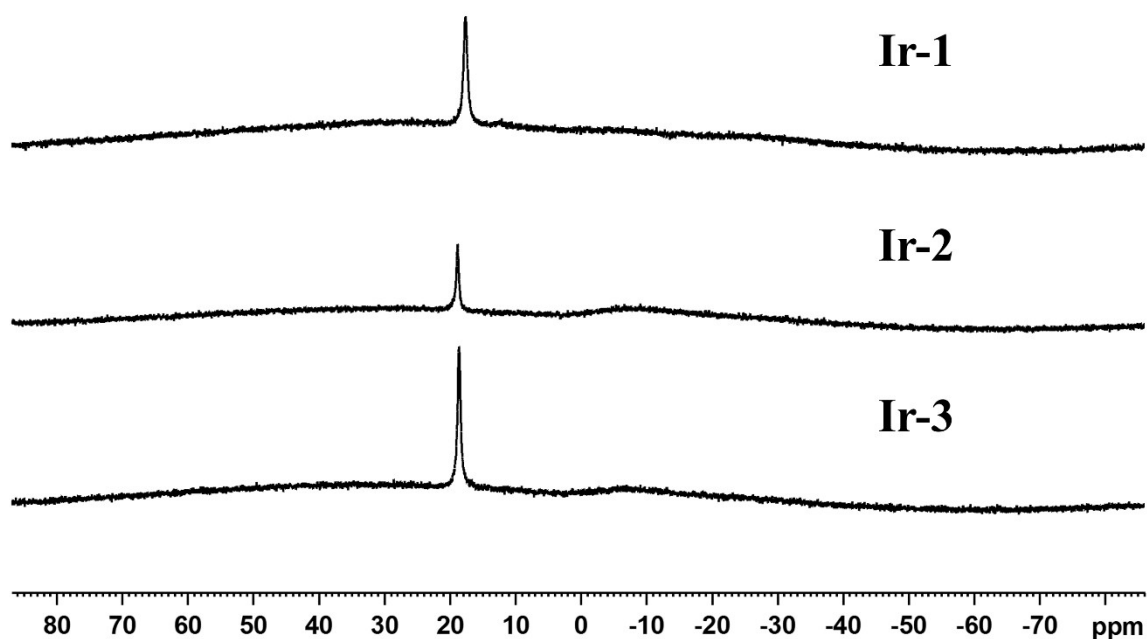

**Figure S9.** <sup>11</sup>B-NMR spectral stack plot of dried filtrates obtained after the hydrolysis reaction of three different Ir@BNH<sub>x</sub> nanocomposites. Dried filtrates were dissolved in milli Q water and NMR spectra was recorded. The iridium precursors used for synthesis of Ir@BNH<sub>x</sub> nanocomposite are Ir-1: H<sub>2</sub>IrCl<sub>6</sub>, Ir-2: IrCl<sub>3</sub>, and Ir-3: [Ir(COD)Cl]<sub>2</sub>.

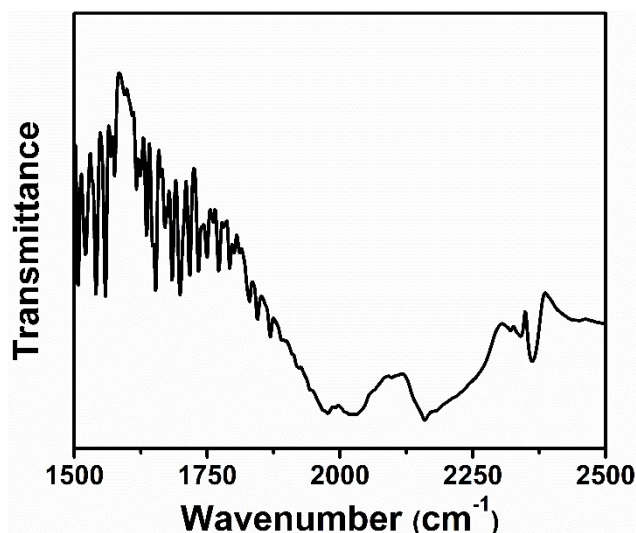

**Figure S10.** FT-IR spectrum of iridium nanosponge treated with CO.

### General information

For optimization study (except table 2, table S1 entry number 6 and 8, and table S2), styrene was used as a model substrate and the product obtained was ethylbenzene. Here, GC-MS characterization of styrene and ethylbenzene were presented first as a model spectra. Afterwards, only gas chromatogram was attached for styrene and ethylbenzene.

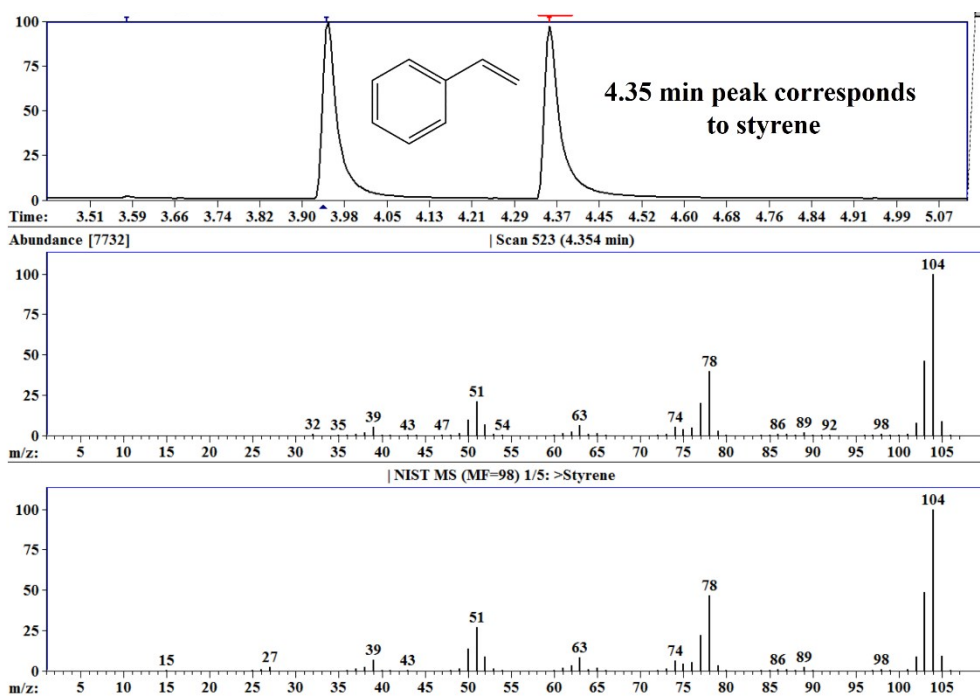

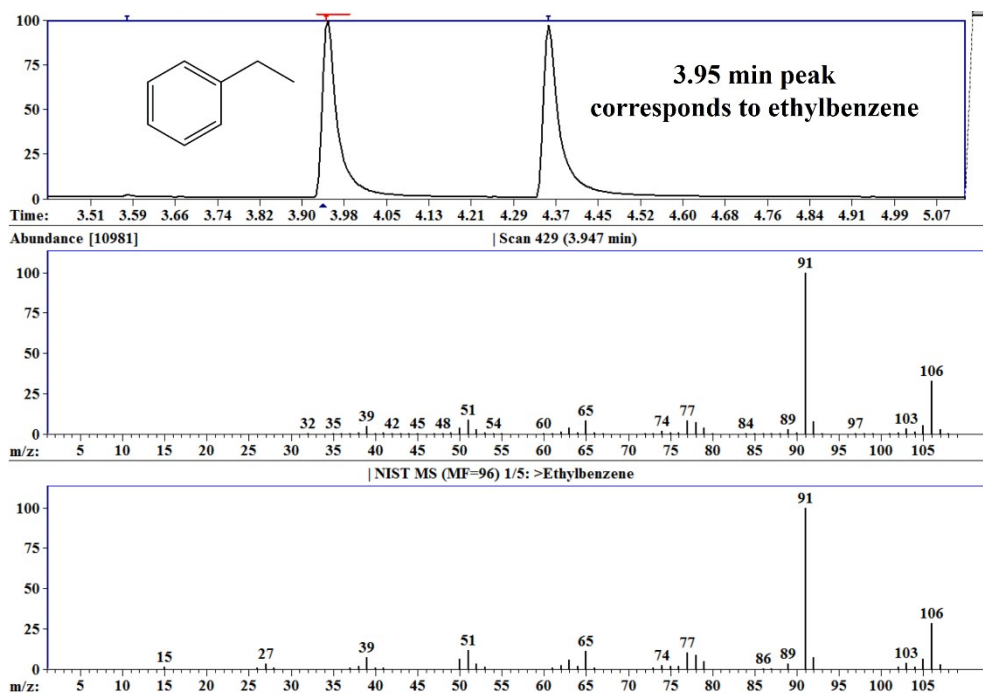

**Table 1 (effect of substrate/catalyst ratio) – entry 1-4**

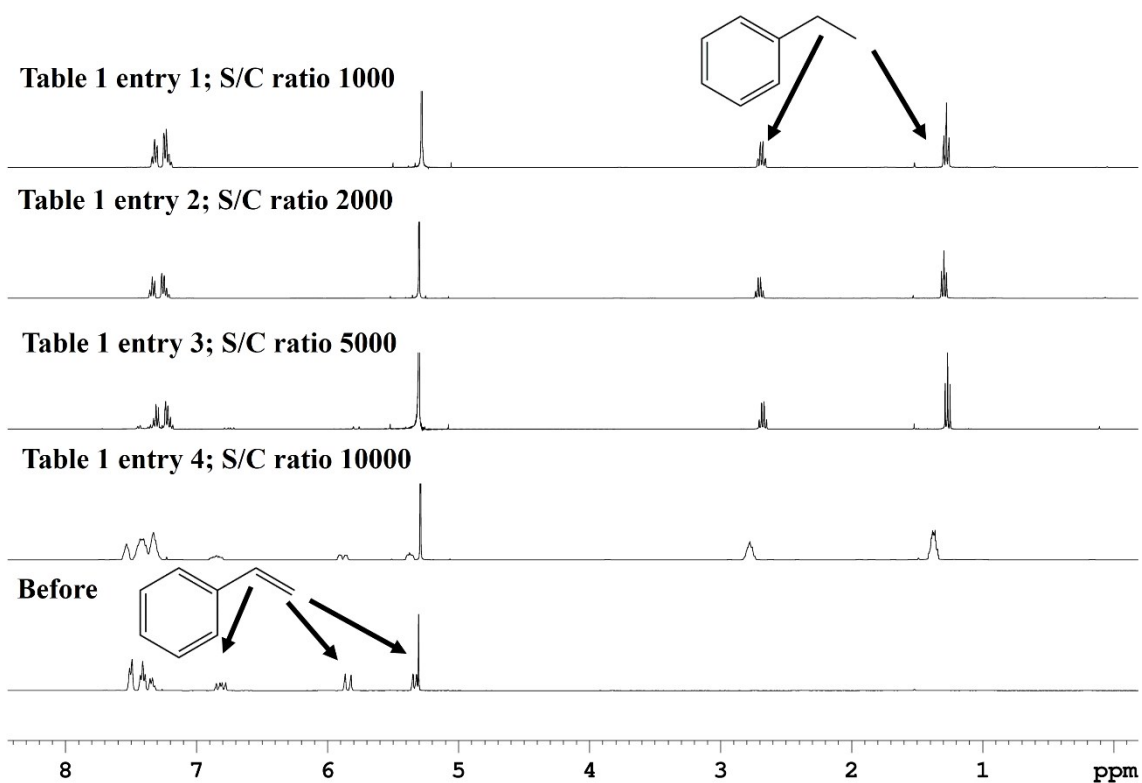

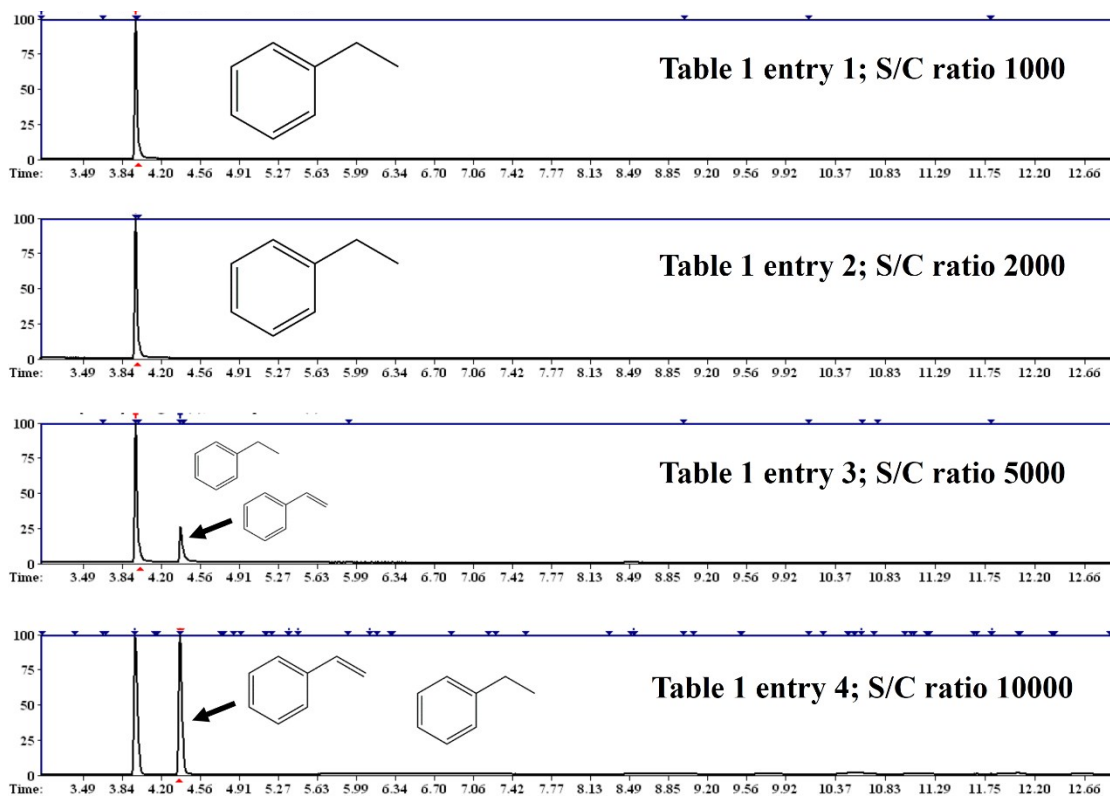

**Table 1 (effect of pressure) – entry 5-8**

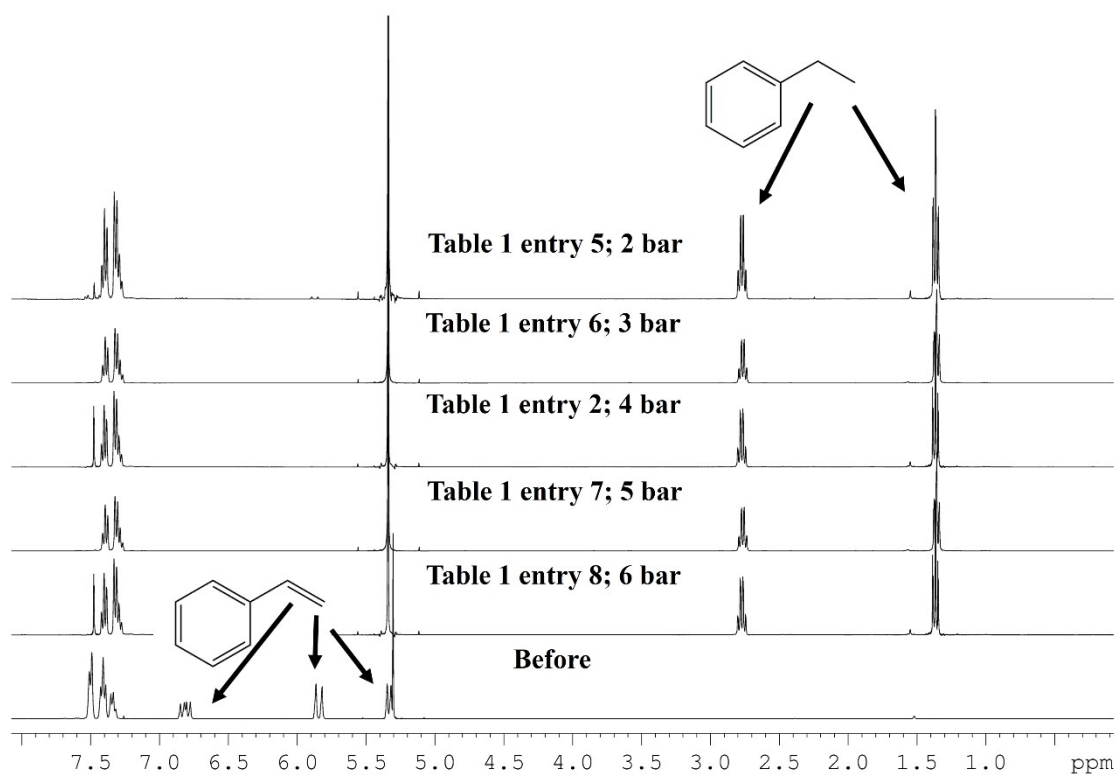

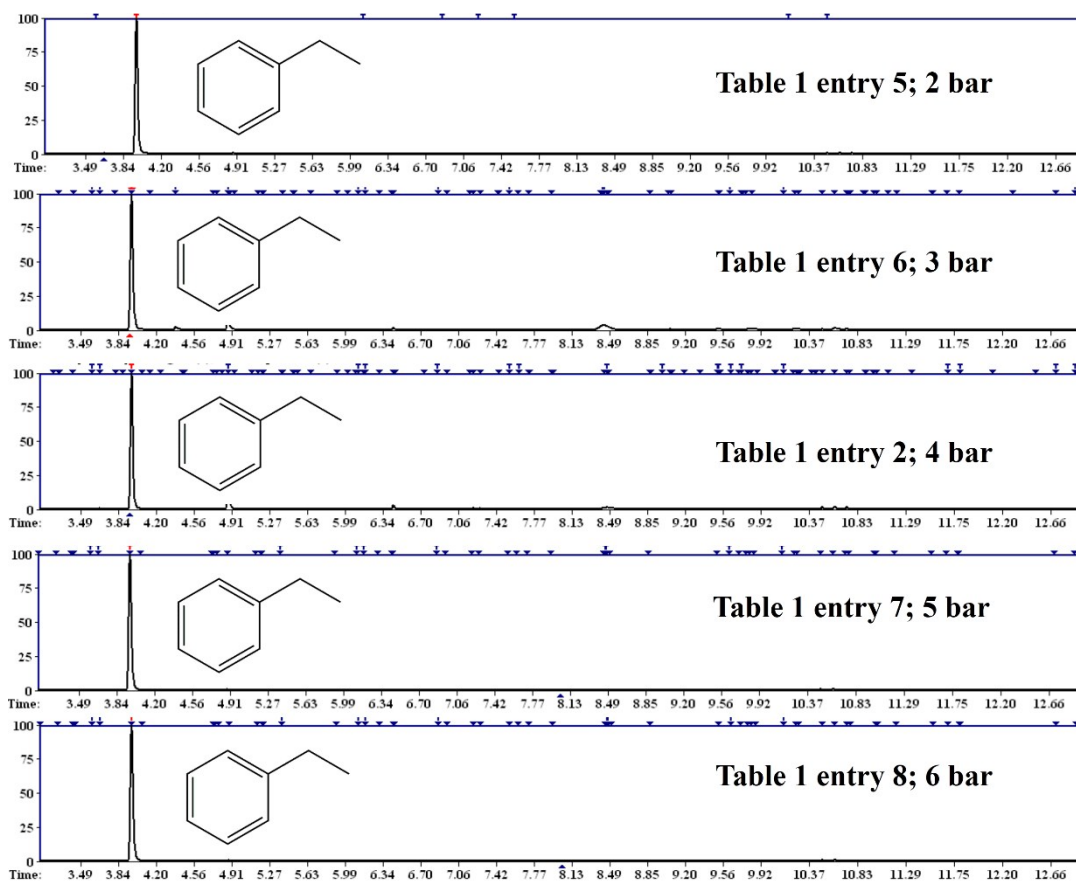

Blank experiment without hydrogen gas:

Gas Chromatogram

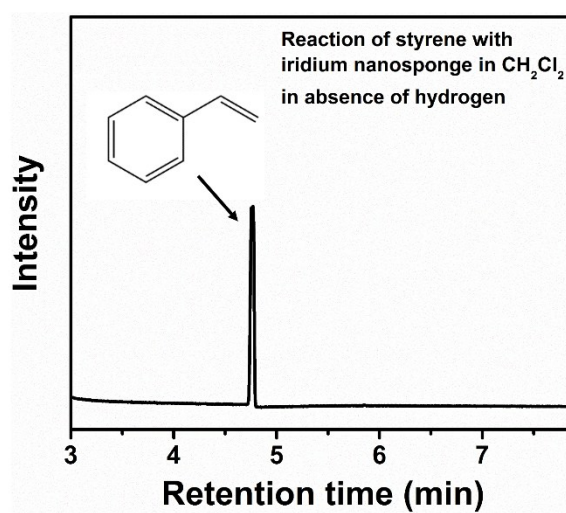

**Table 1 (effect of temperature) - entry 9-11**

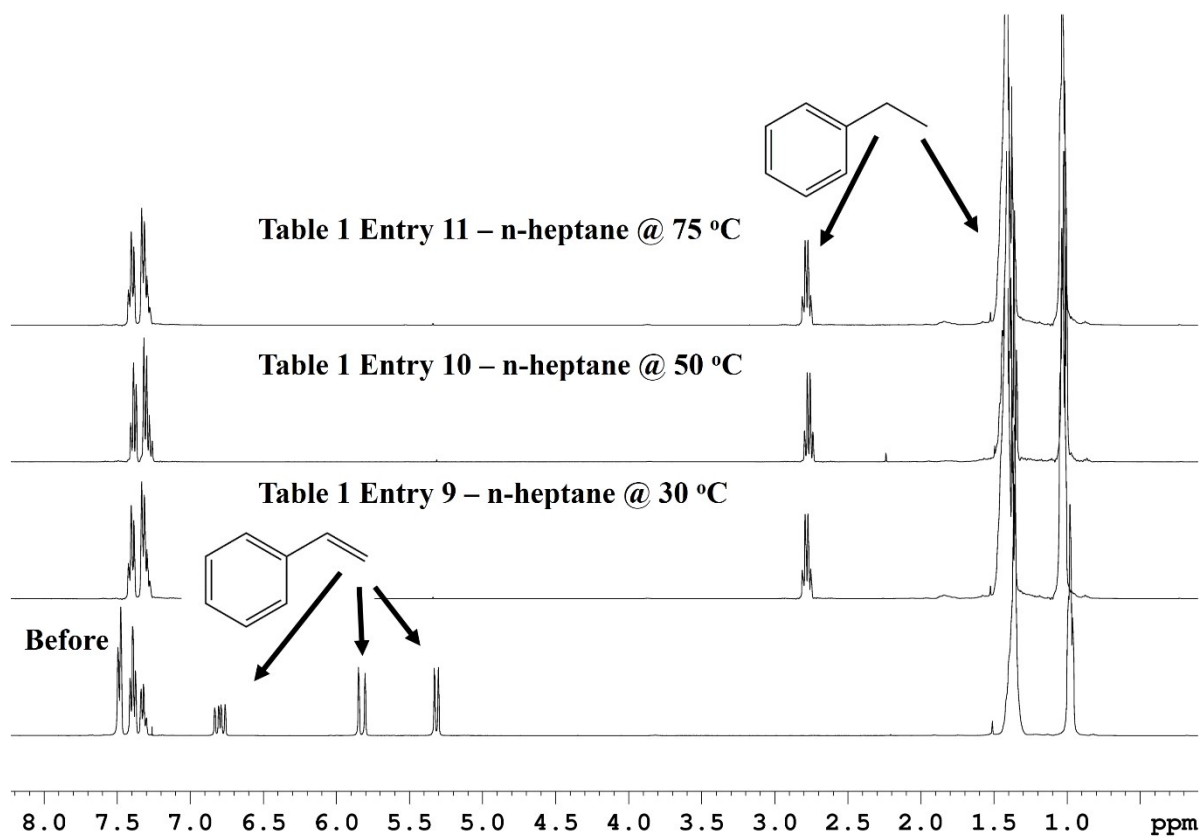



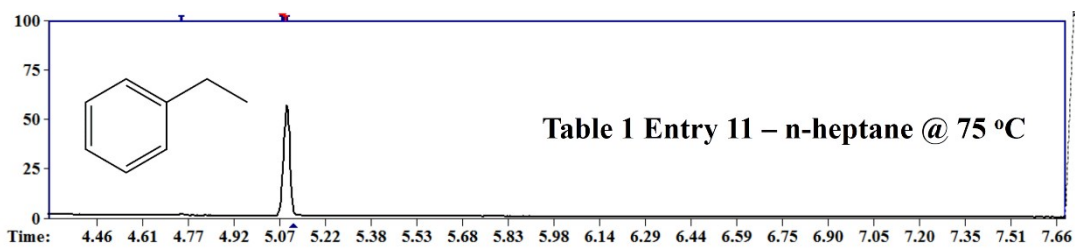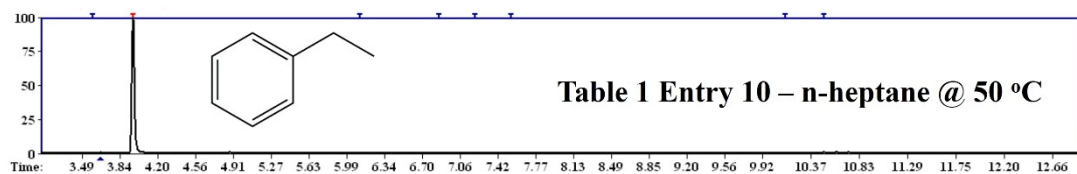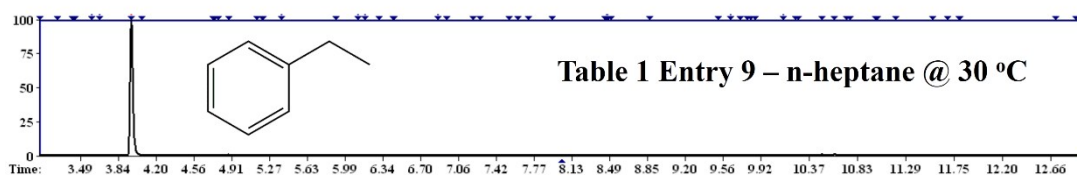

**Table S1** (Hydrogenation of alkenes at different temperatures) entry 1-4 is same for the table 1 entry 2, 9-11. Table S1 entry 5 is same for the table 3 entry 9. Similarly, table S1 entry 7 is same for the table 3 entry 7.

**Table S1 entry 6 [effect of temperature]**

After  
Table S1 Entry 6

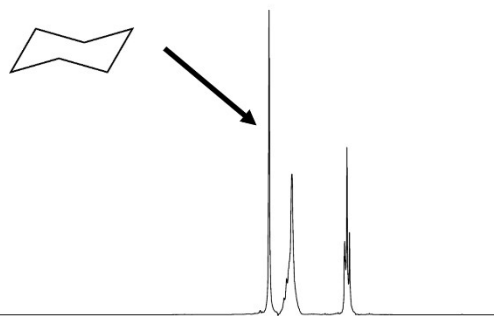

Before

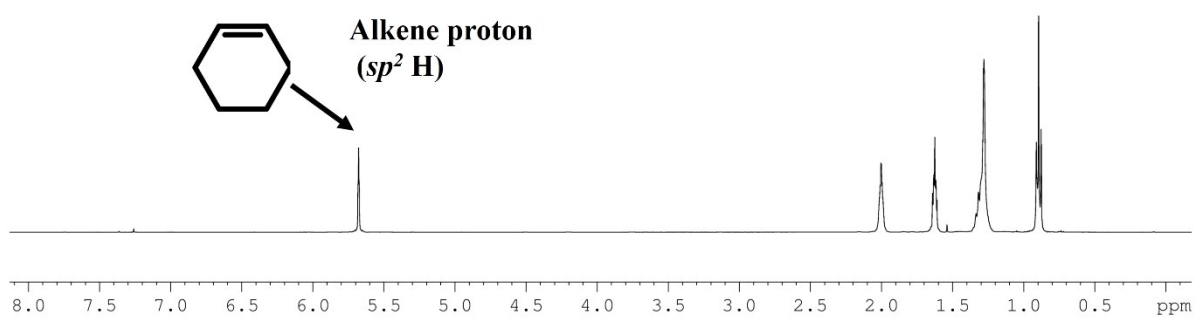

Table S1 entry 8 [effect of temperature]

After  
Table S1 Entry 8

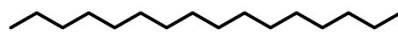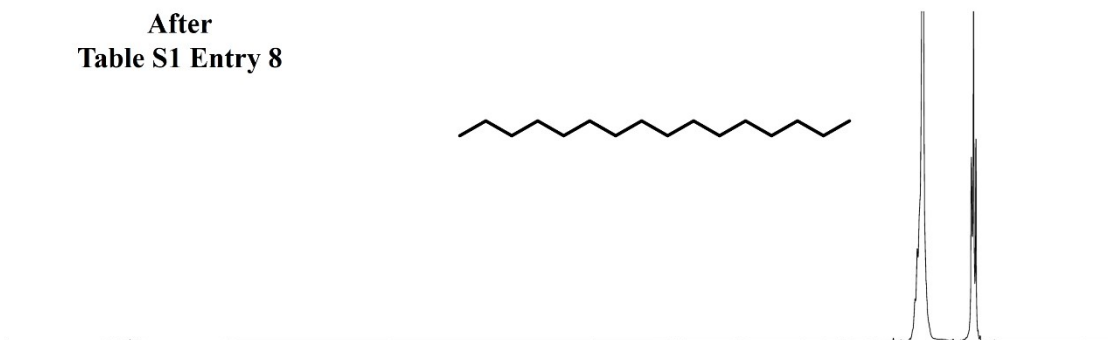

Before

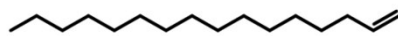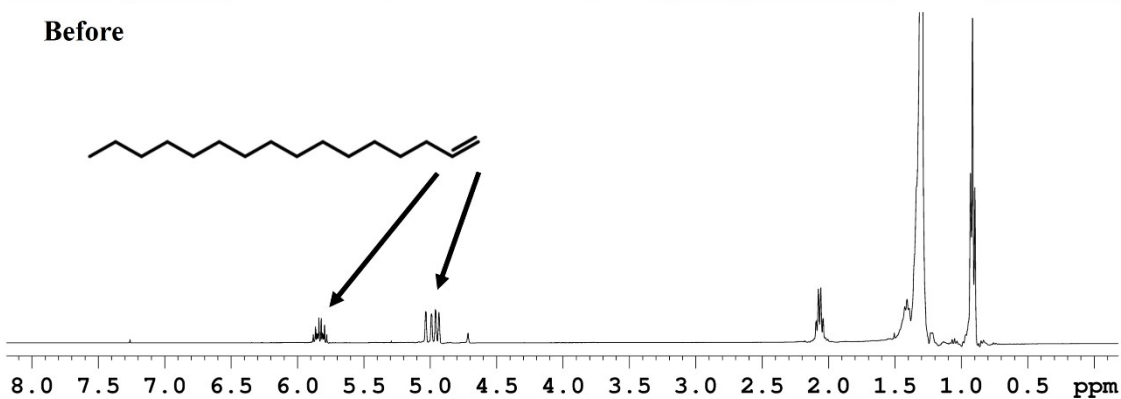

After  
Table S1 Entry 8

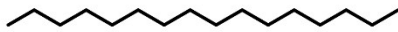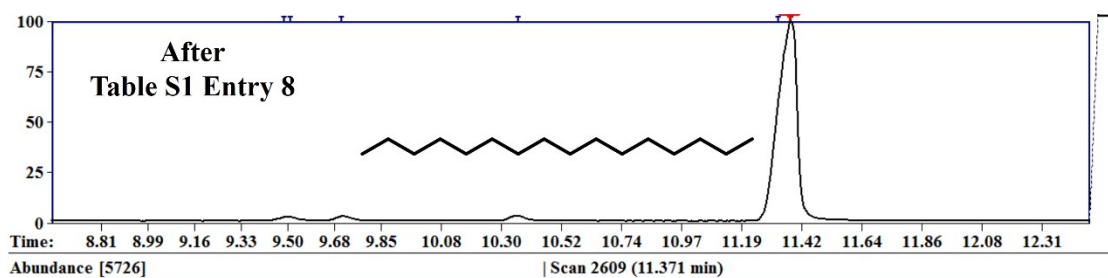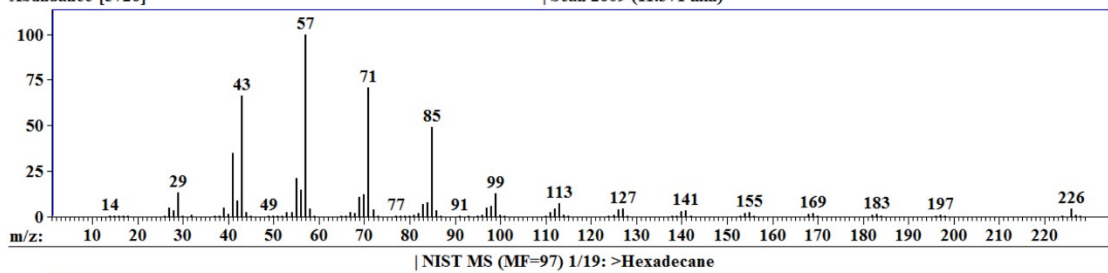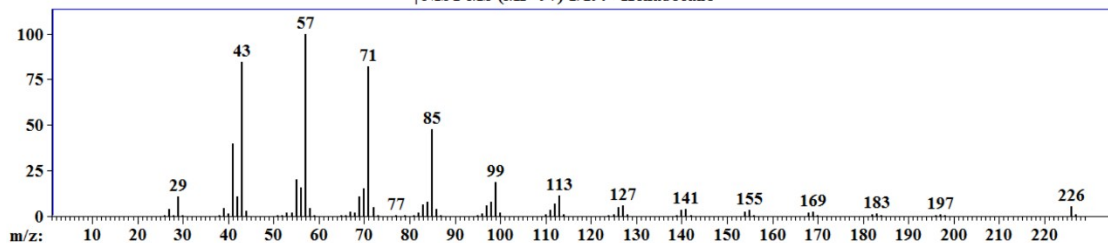

Table 2 entry 1

Table 2 entry 1

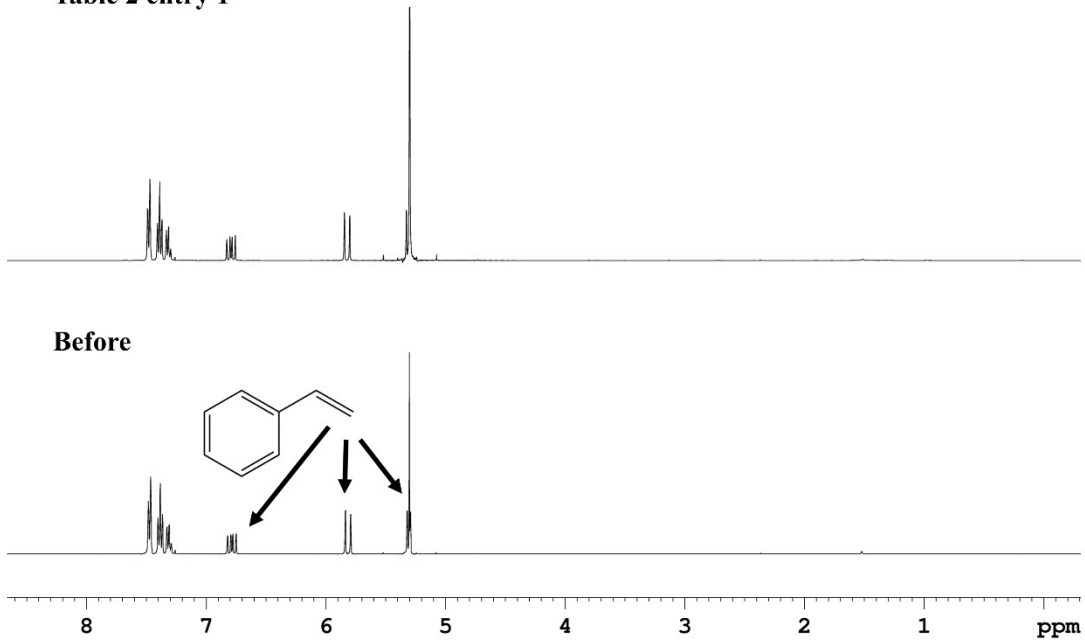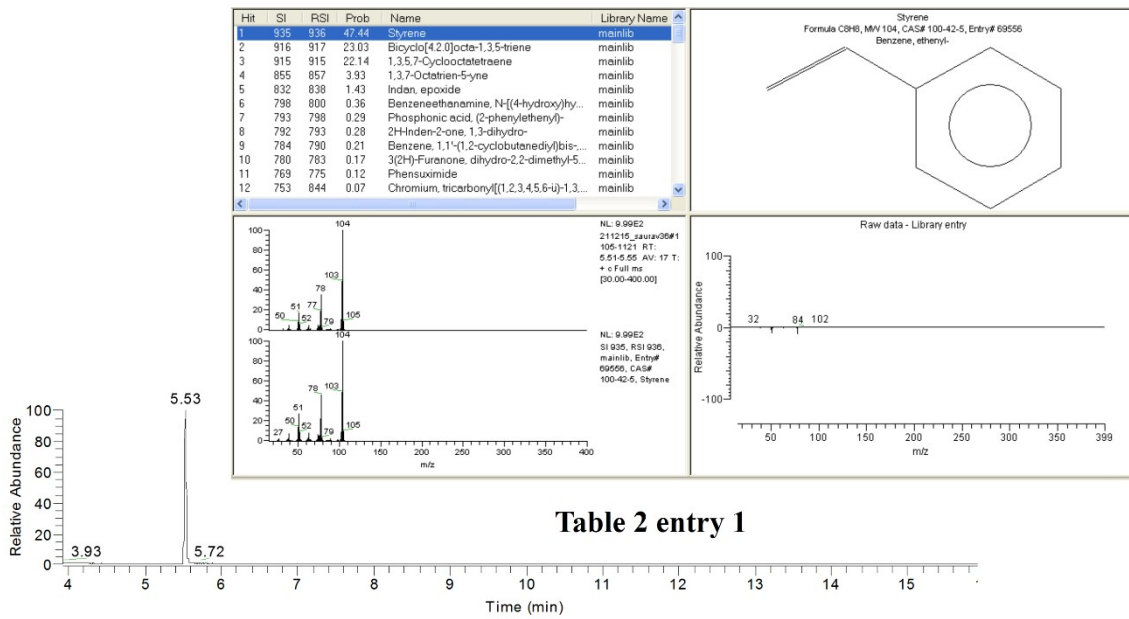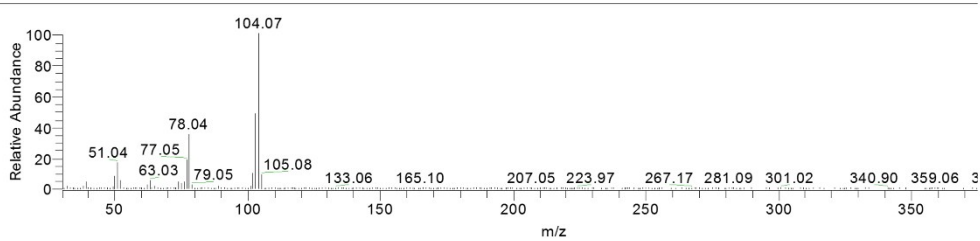

Table 2 entry 2

Table 2 entry 2

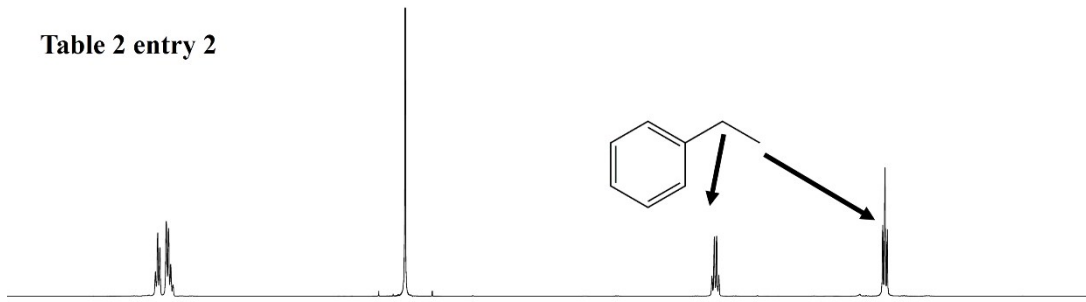

Before

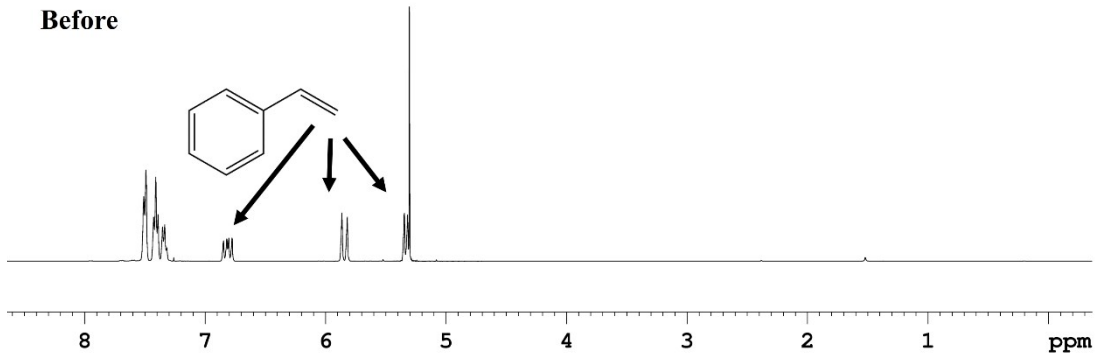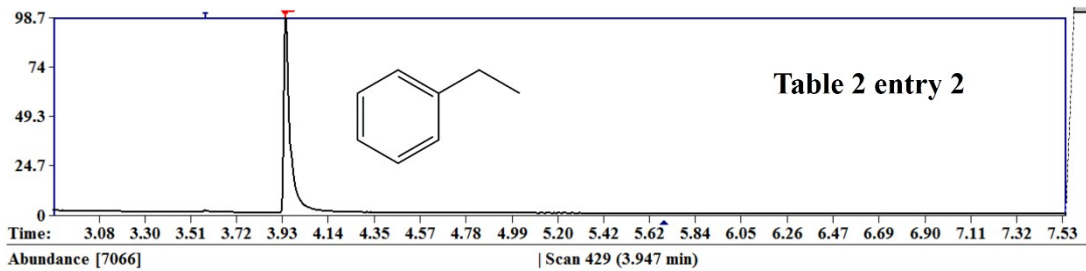

Time: 3.08 3.30 3.51 3.72 3.93 4.14 4.35 4.57 4.78 4.99 5.20 5.42 5.62 5.84 6.05 6.26 6.47 6.69 6.90 7.11 7.32 7.53

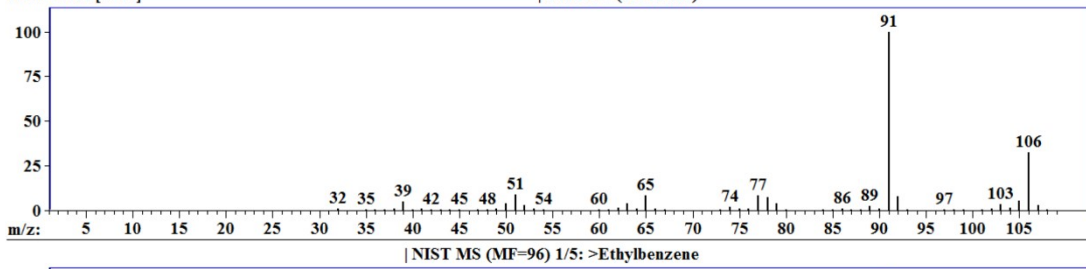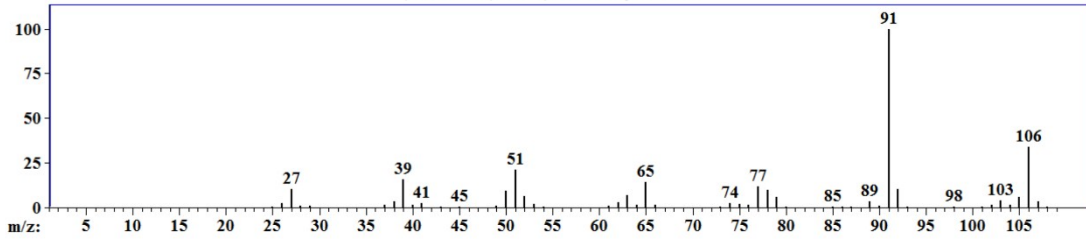

Table 2 entry 3

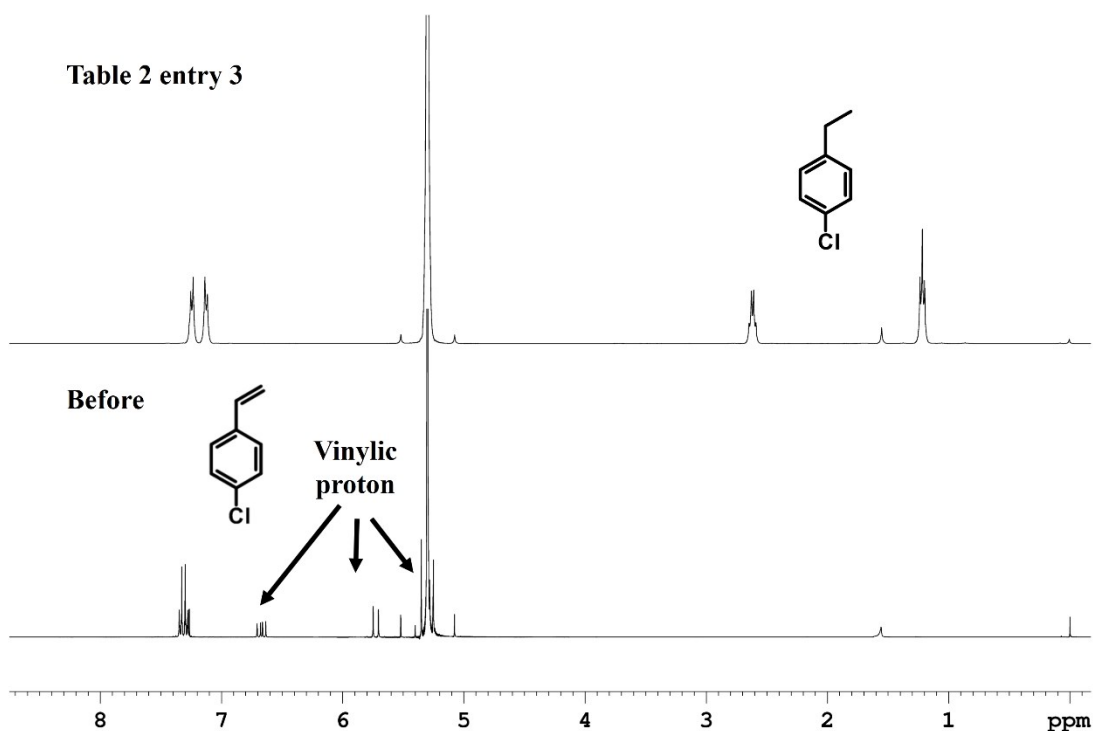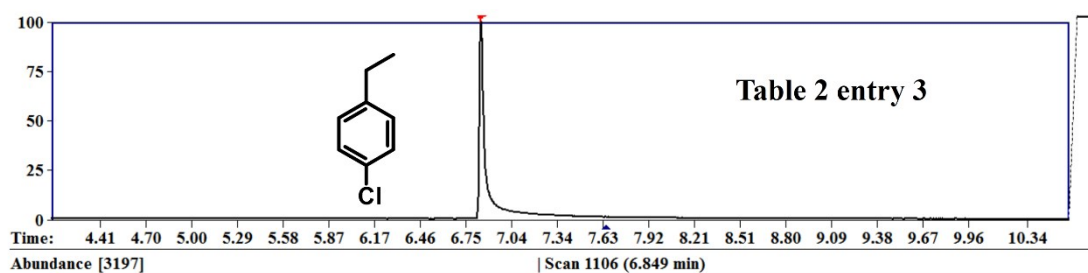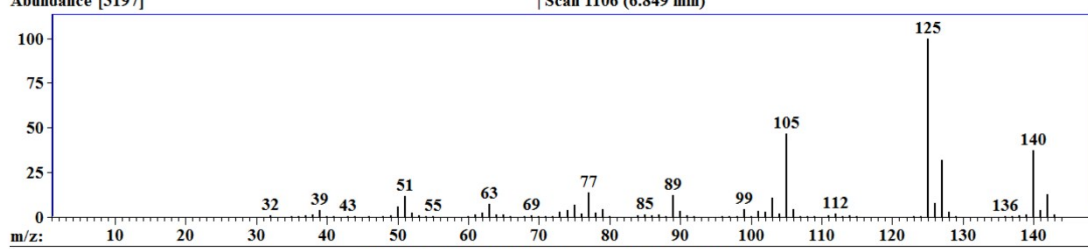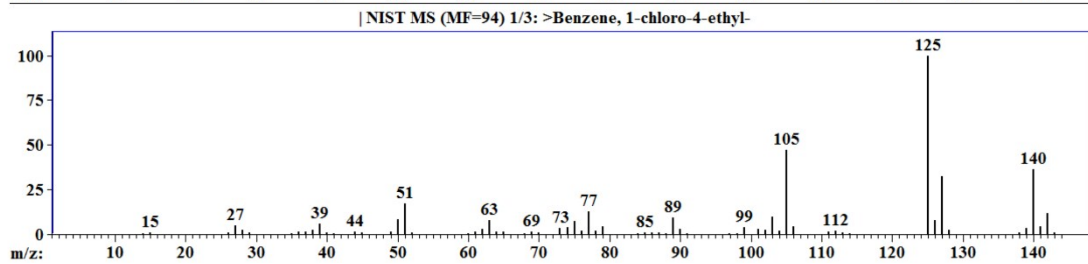

**Table 2 entry 4**

Table 2 entry 4

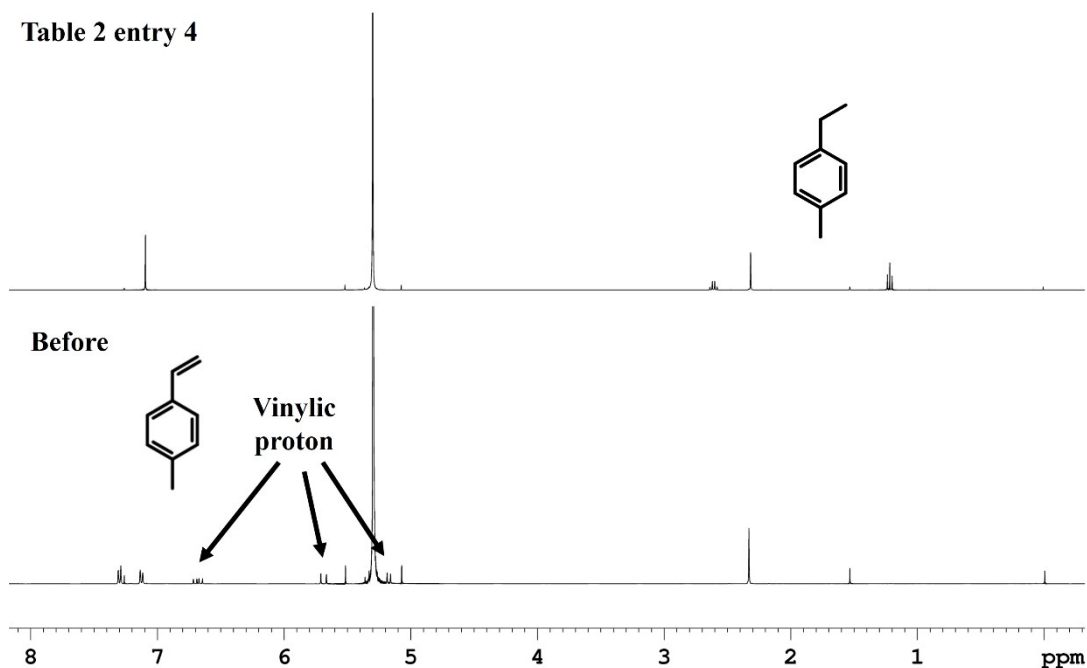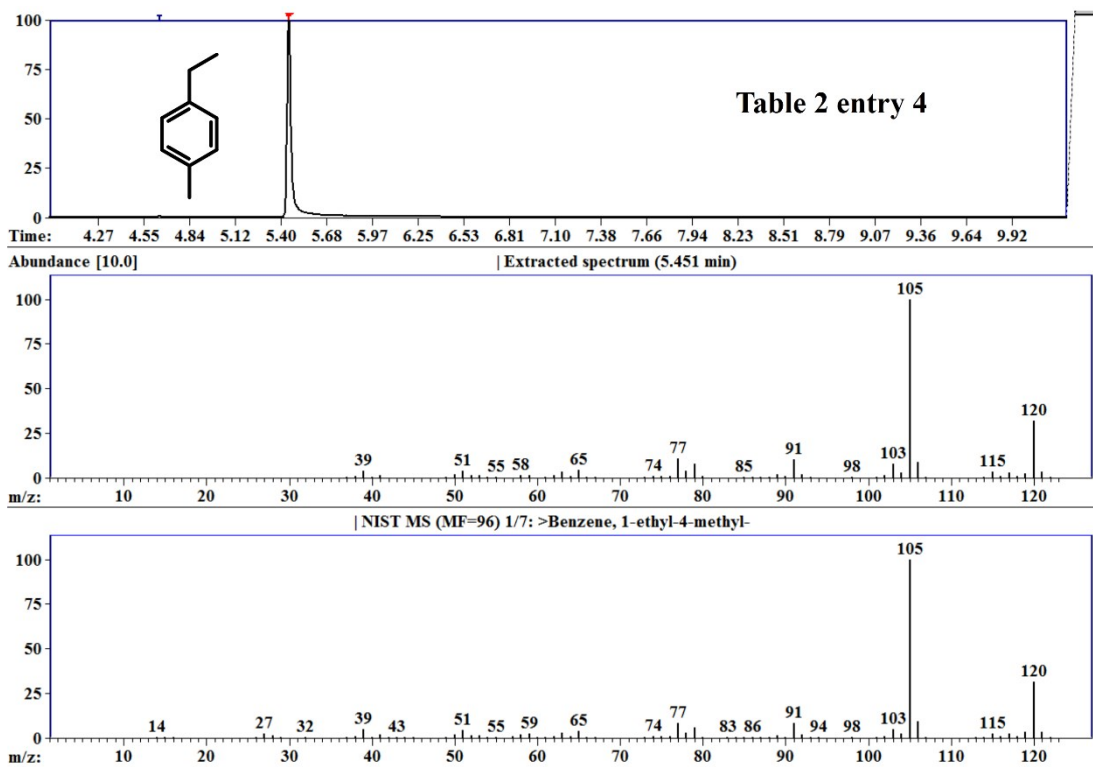

Table 2 entry 5

Table 2 entry 5

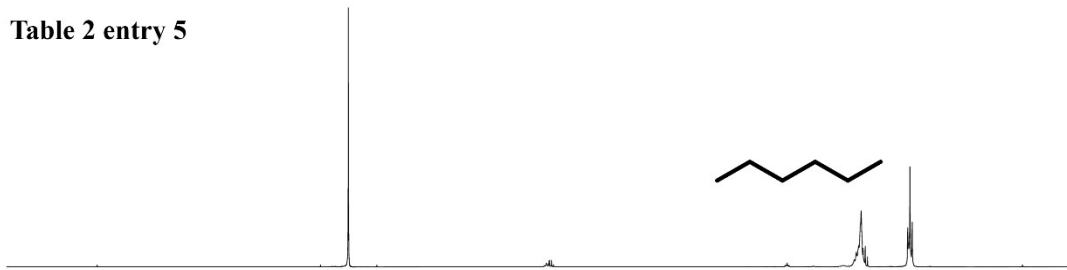

Before

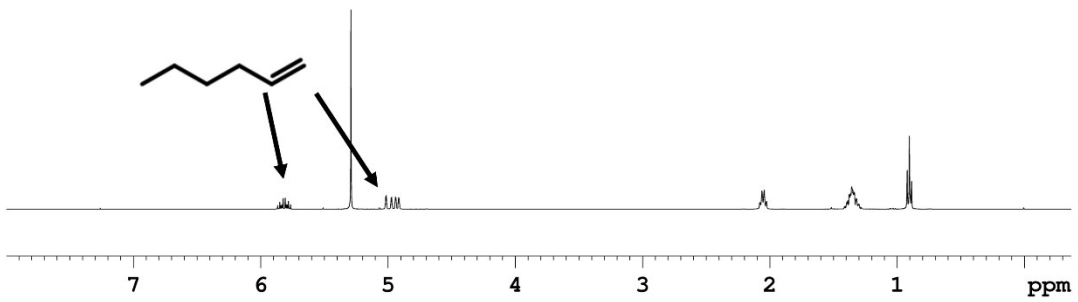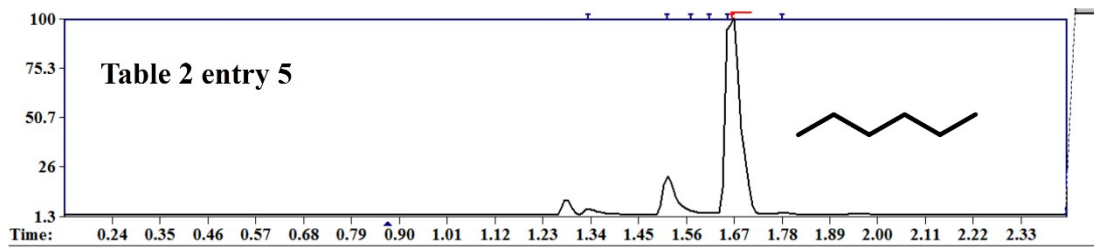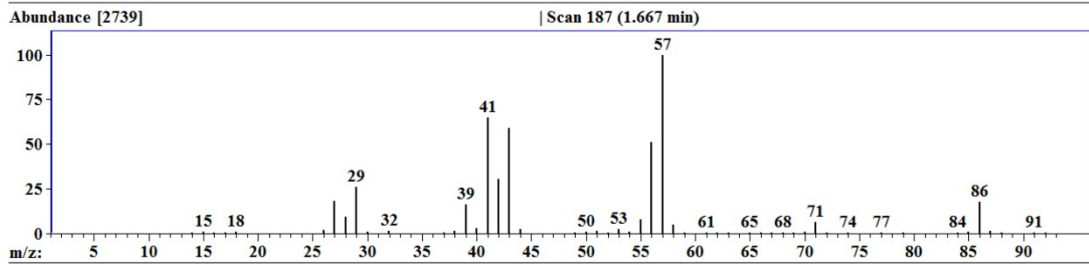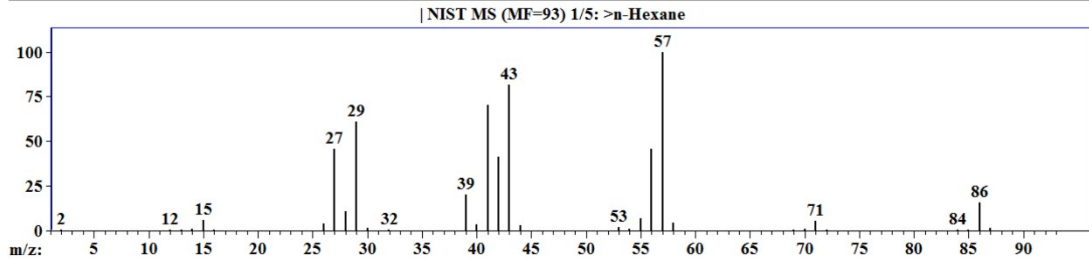

Table 2 entry 6



Table 2 entry 6

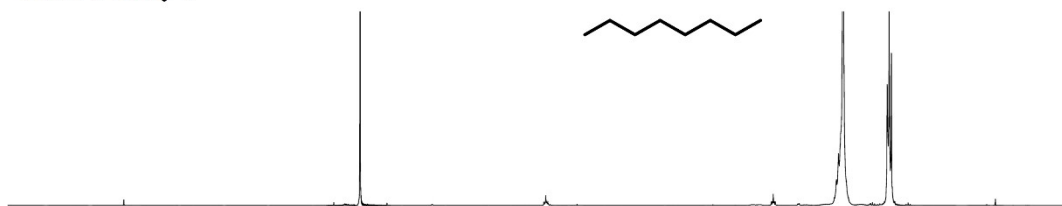

Before

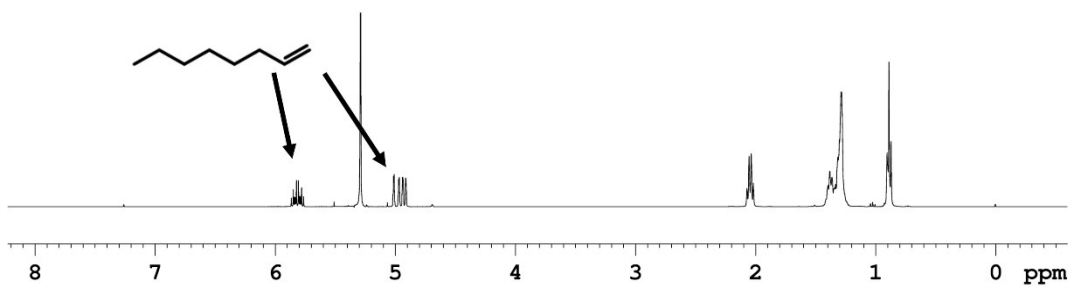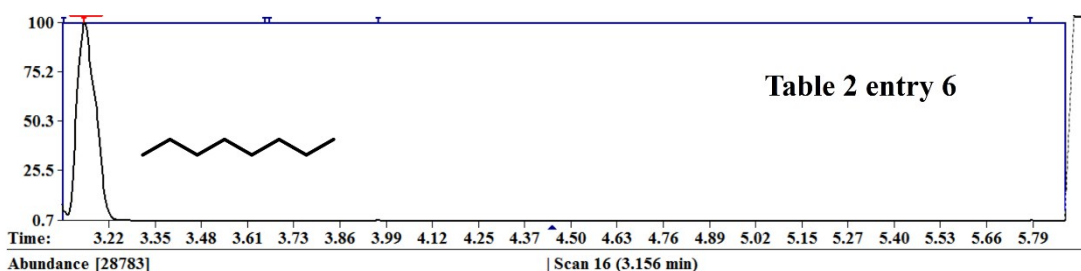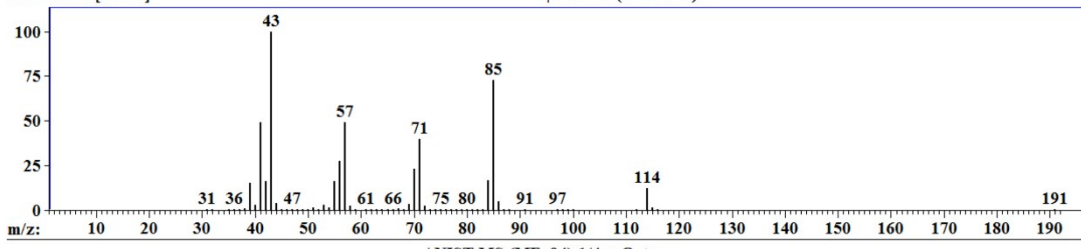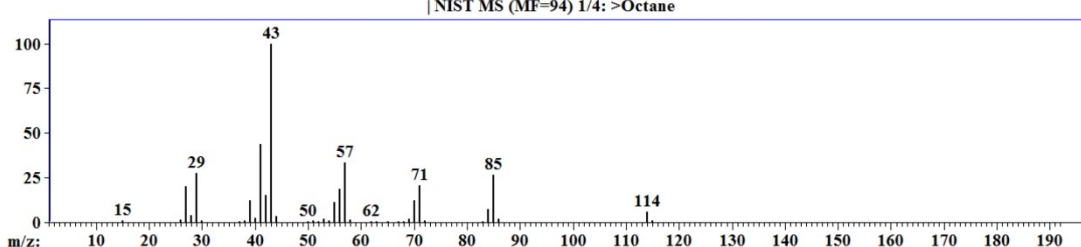

Table 2 entry 7

Table 2 entry 7

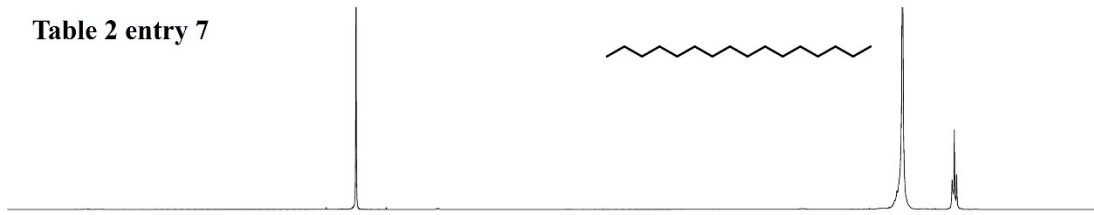

Before

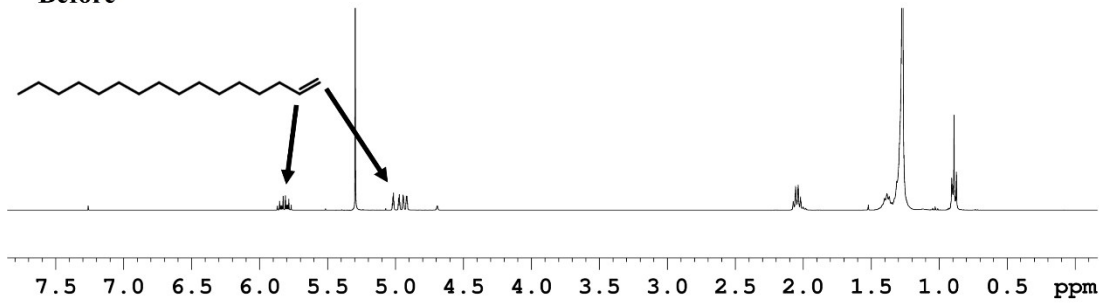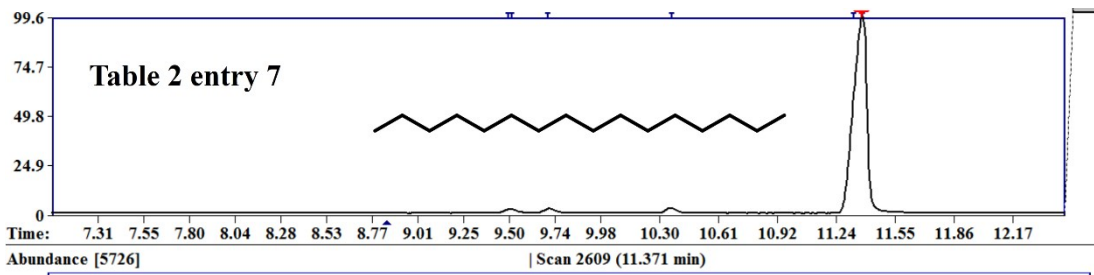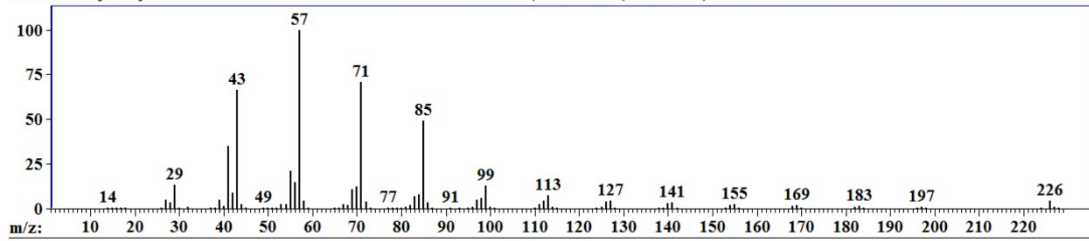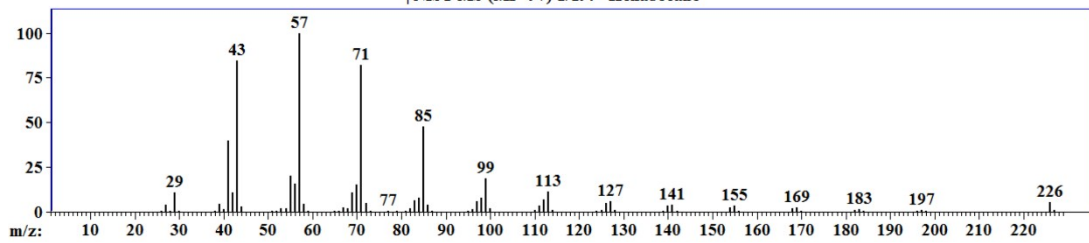

Table 2 entry 8

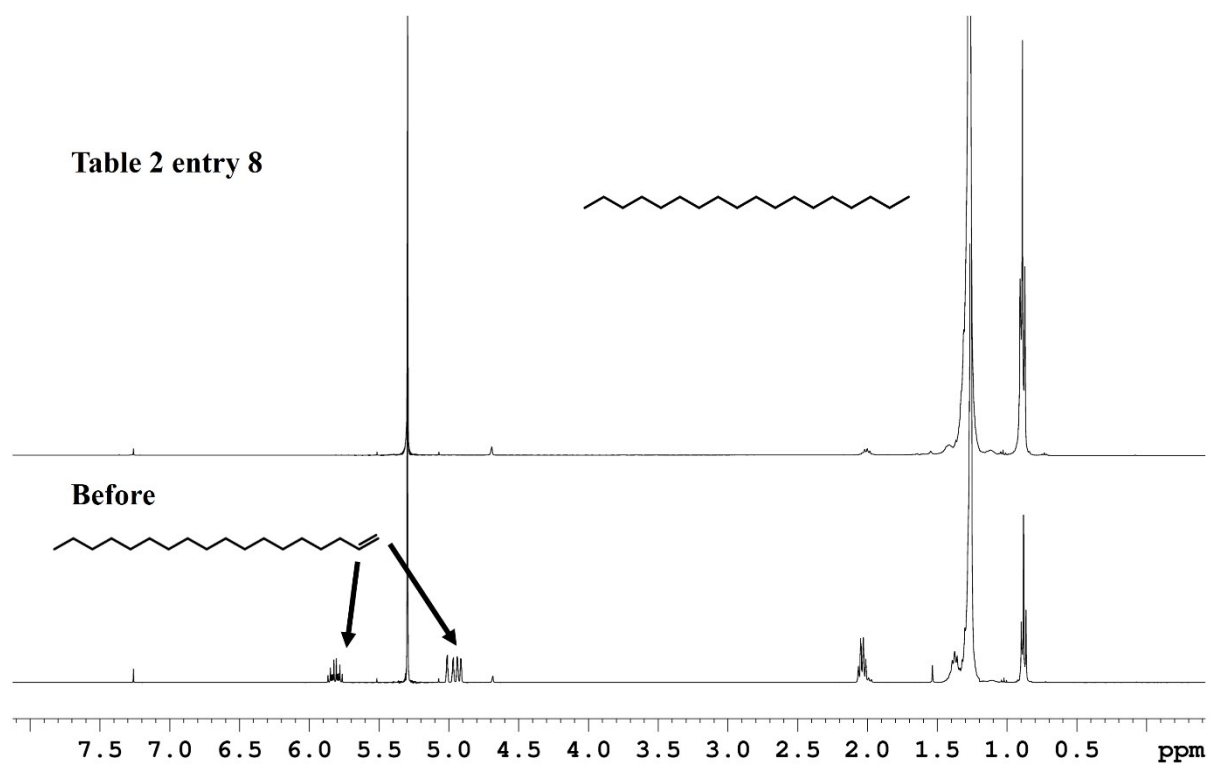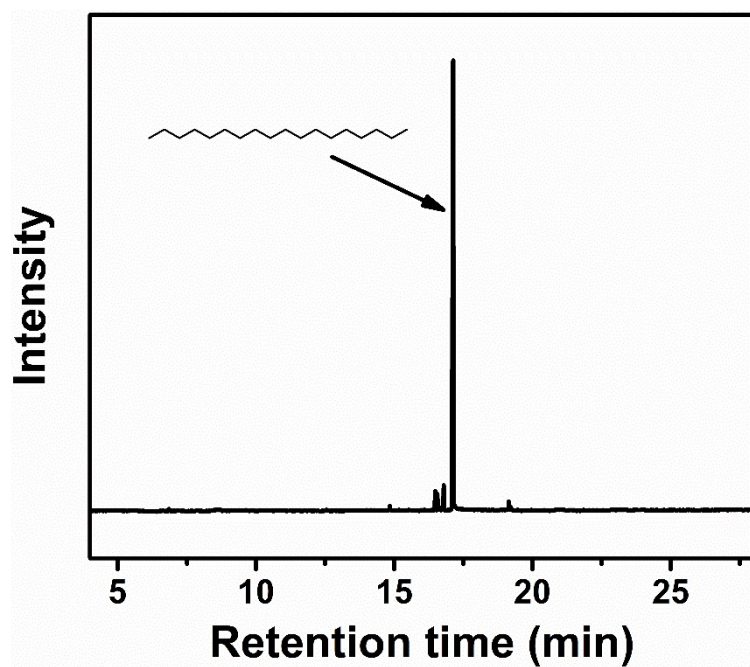

**Table 2 entry 9**

Table 2 Entry 9

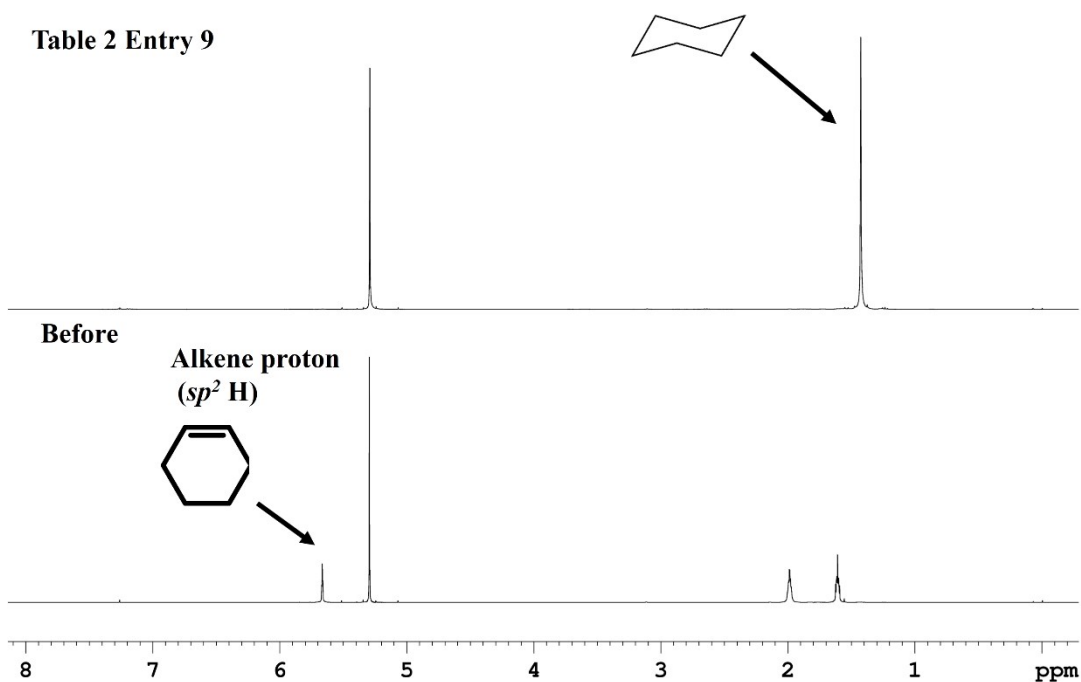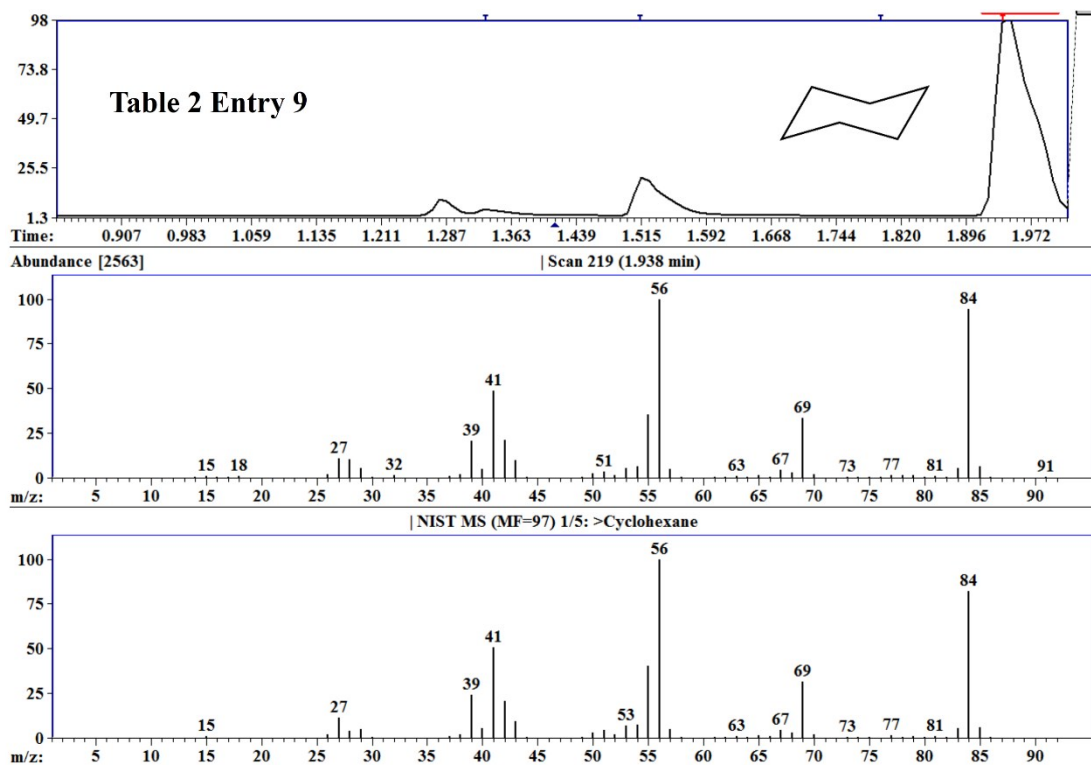

Table 2 entry 10

Table 2 Entry 10

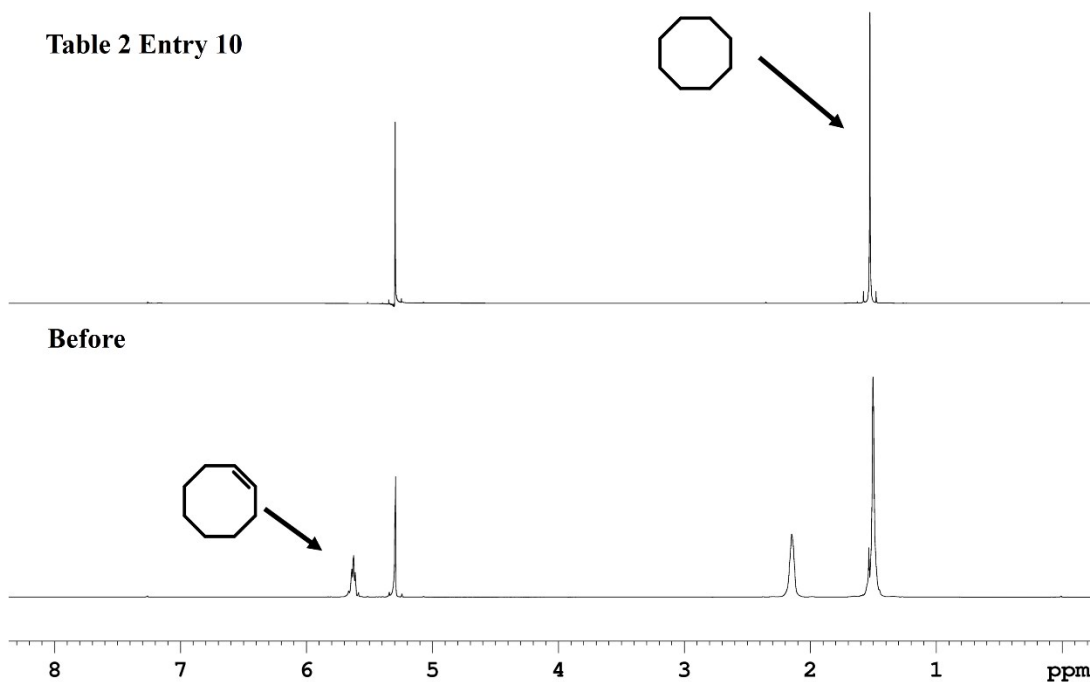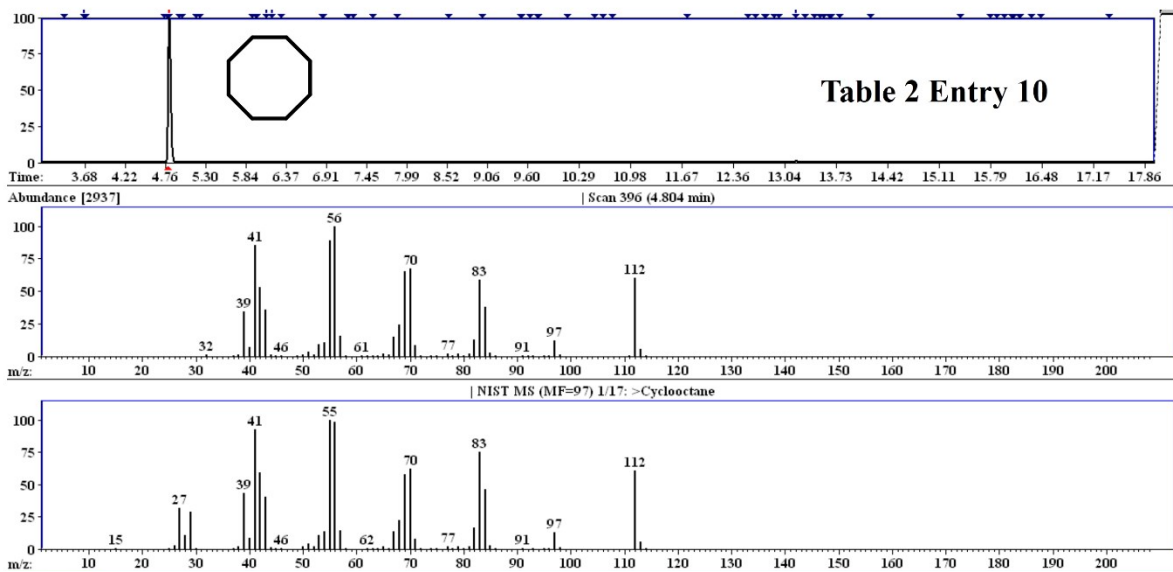

Table 2 entry 11

Table 2 Entry 11

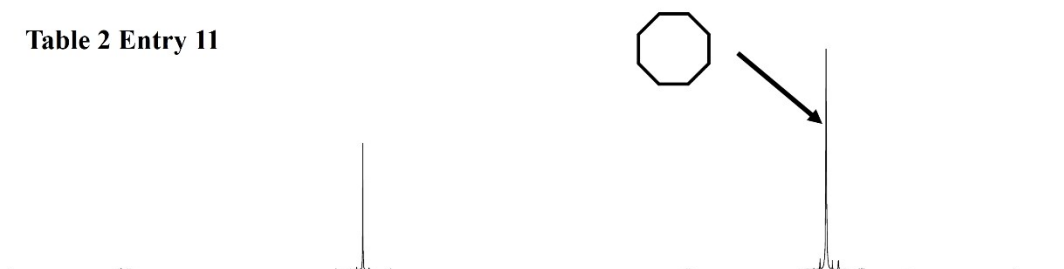

Before

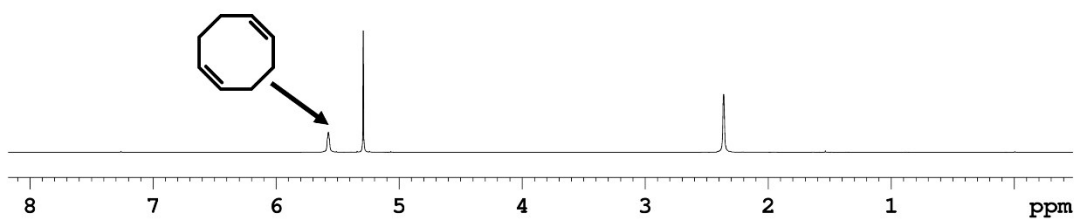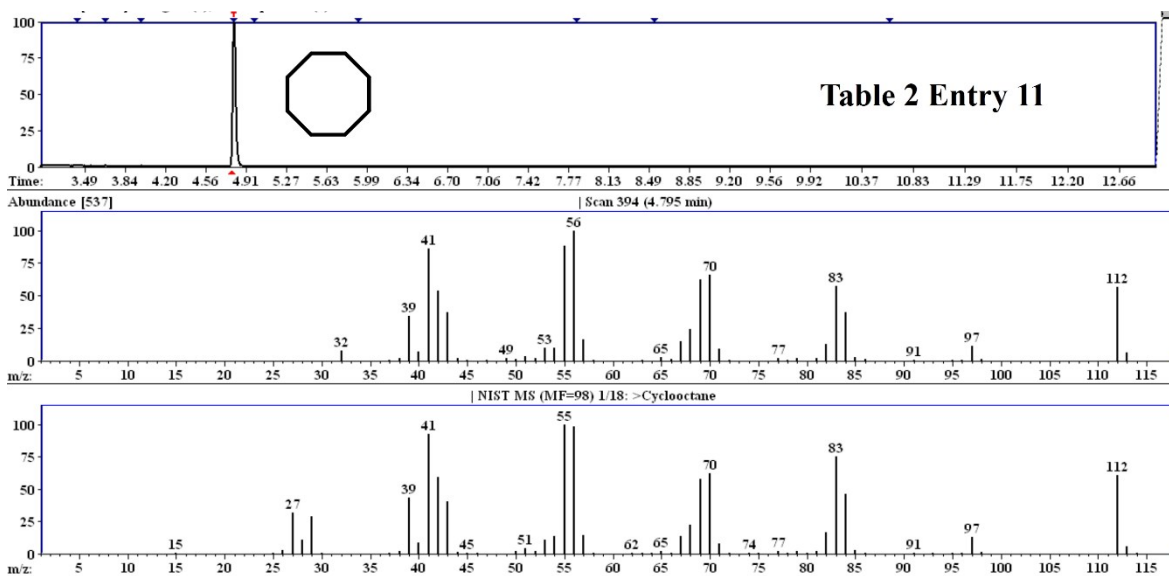

Table 2 entry 12

Table 2 entry 12

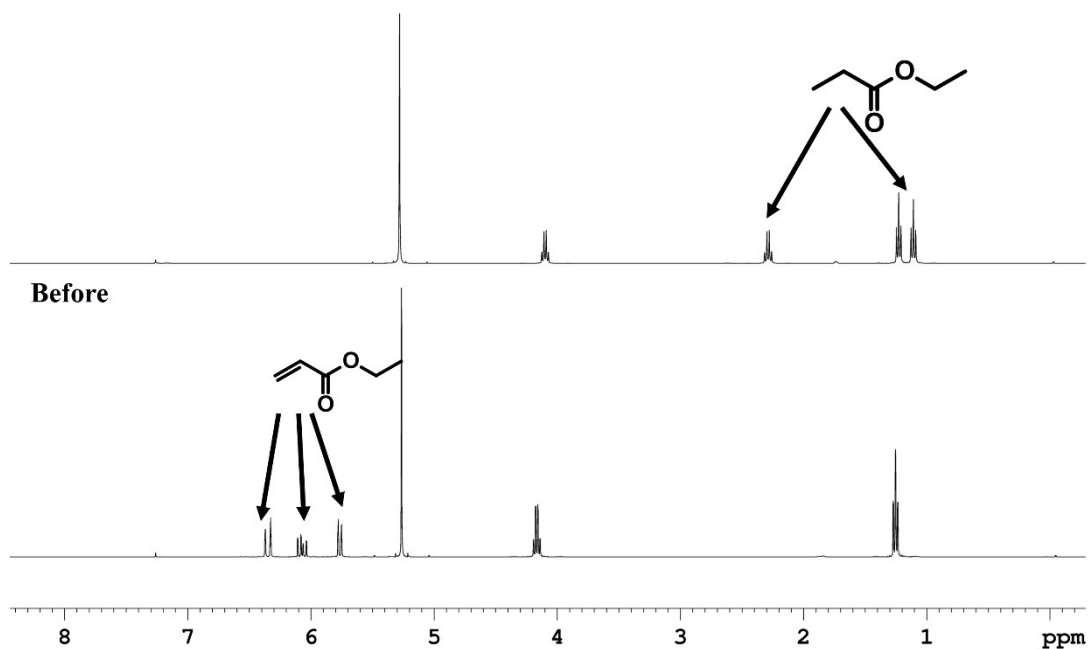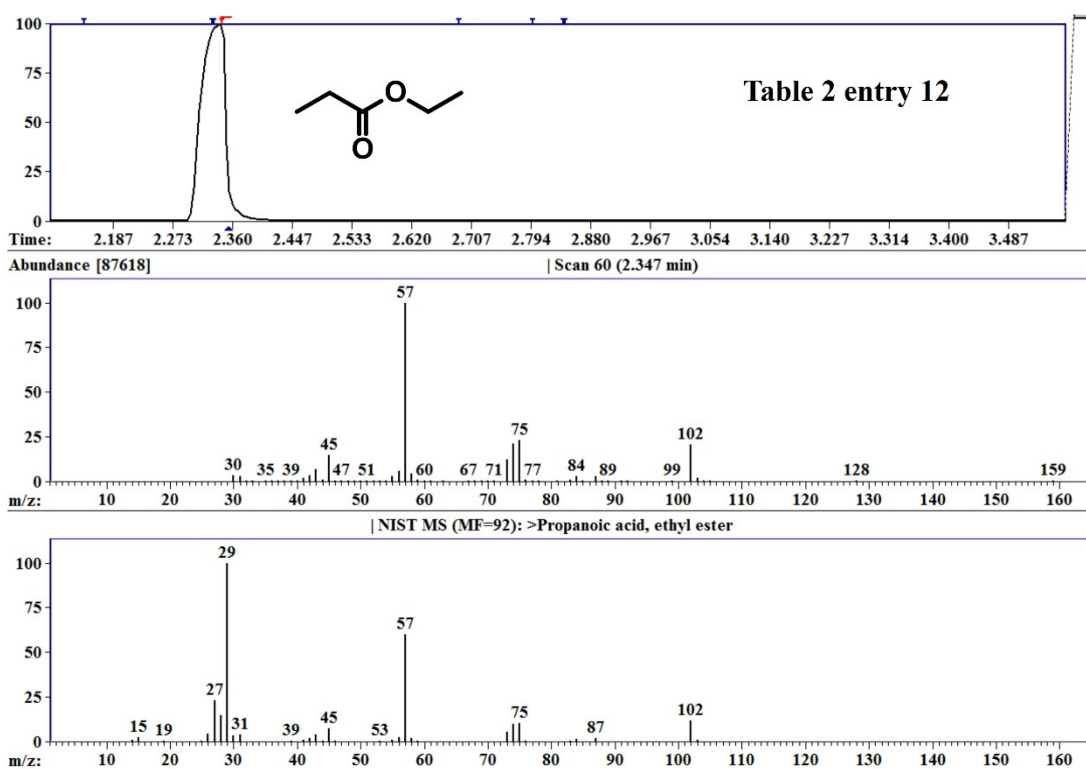

Table 2 entry 13

Table 2 entry 13

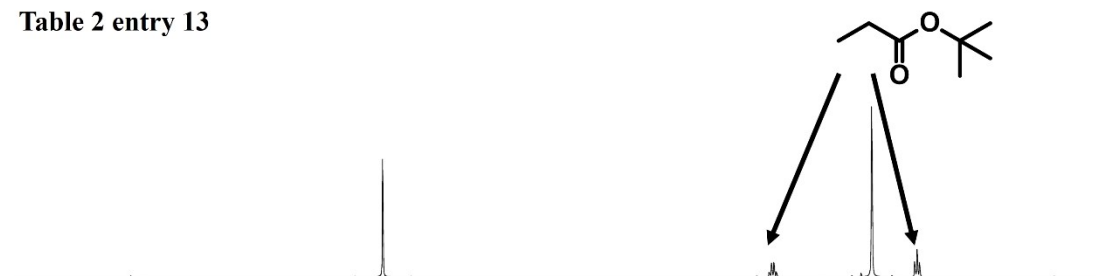

Before

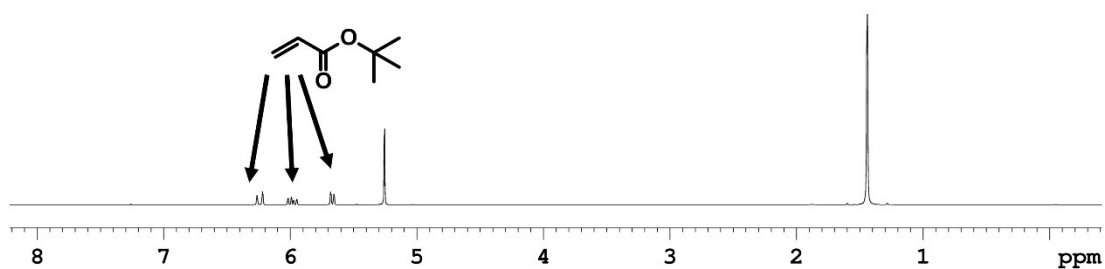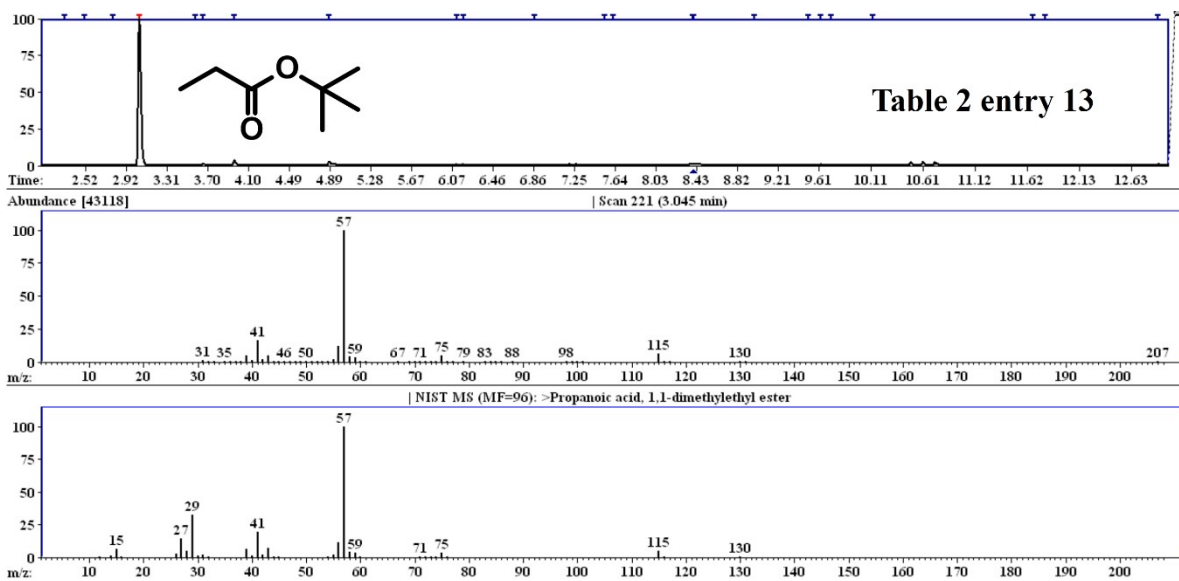

Table 2 entry 14



Table 2 entry 14

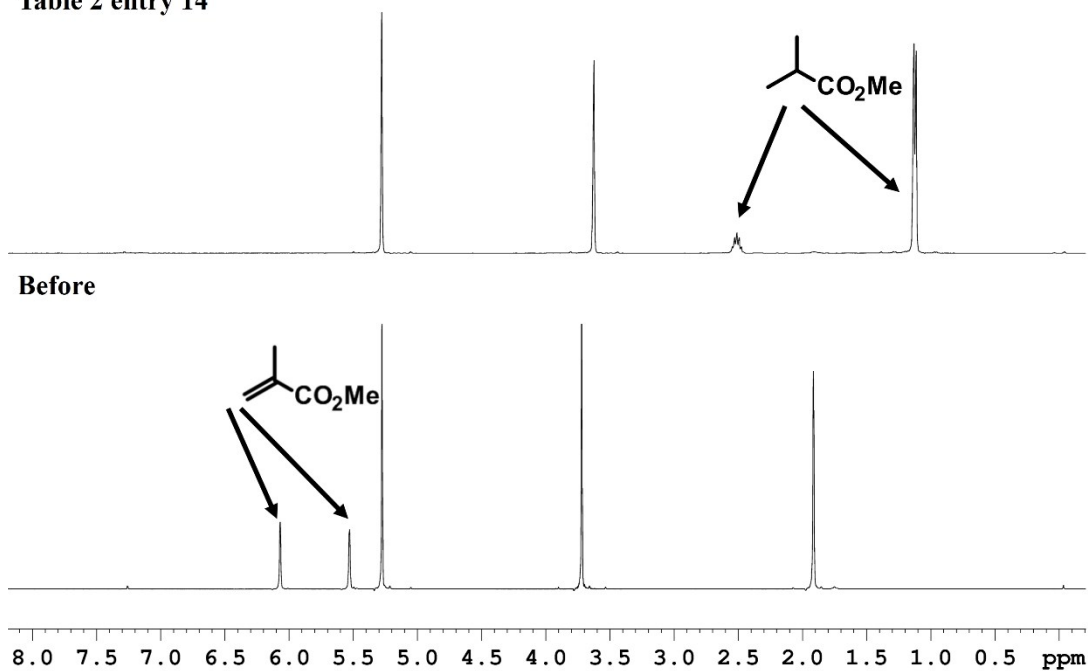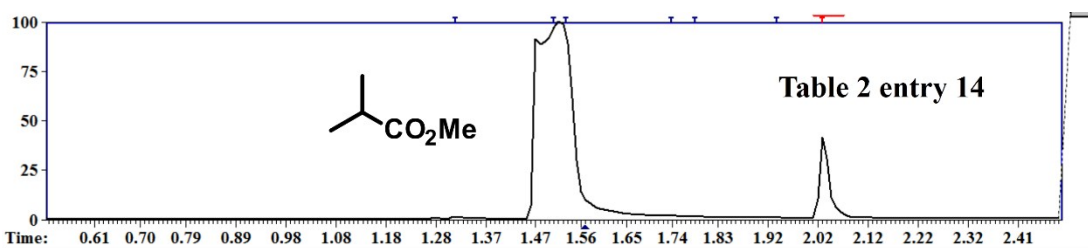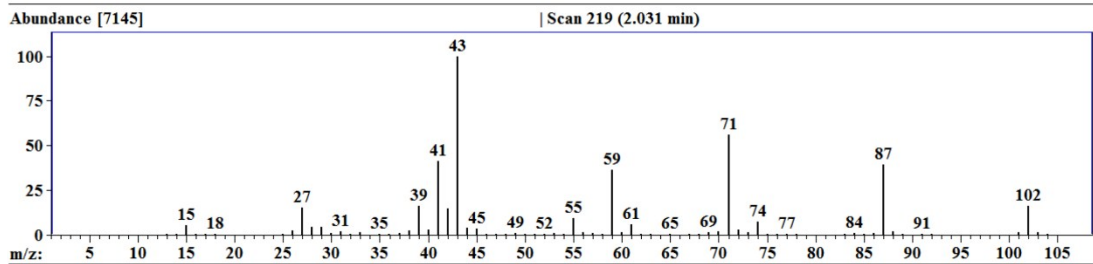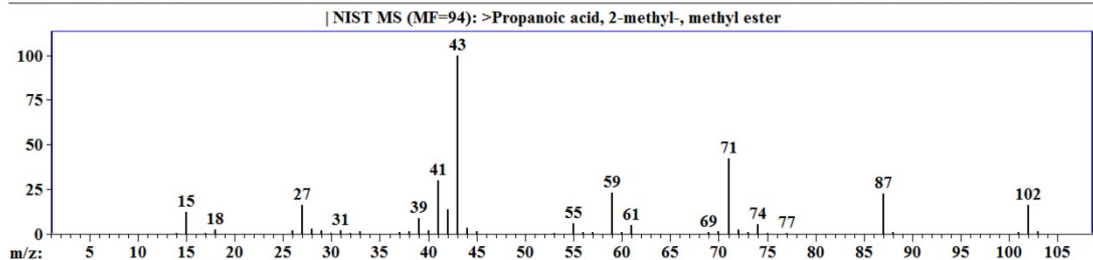

Table 2 entry 15

Table 2 entry 15

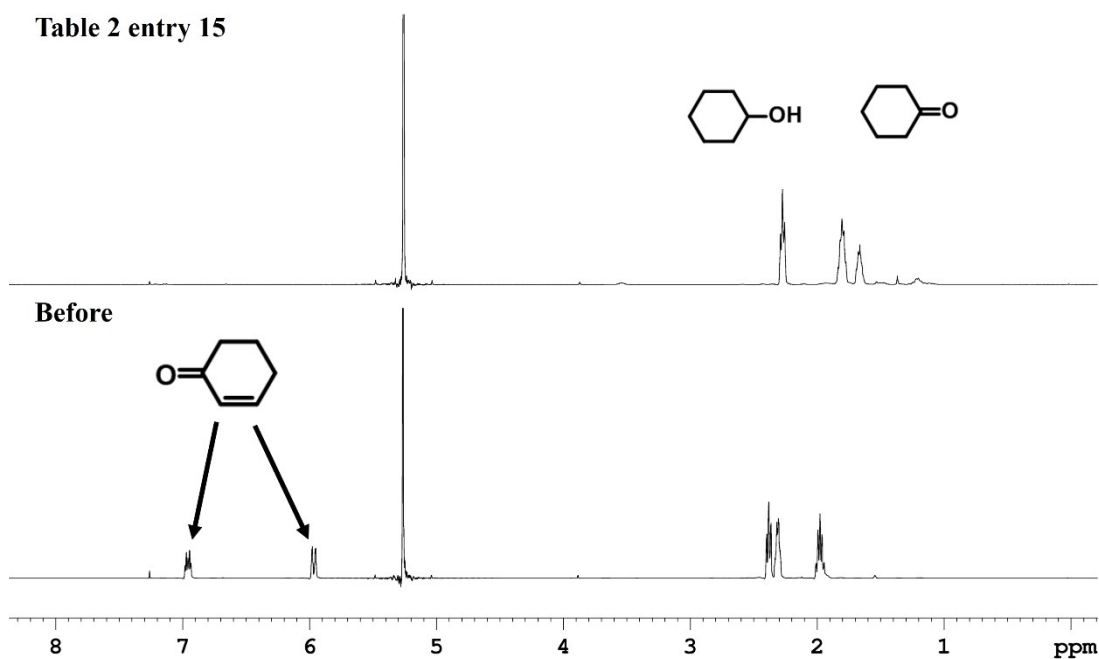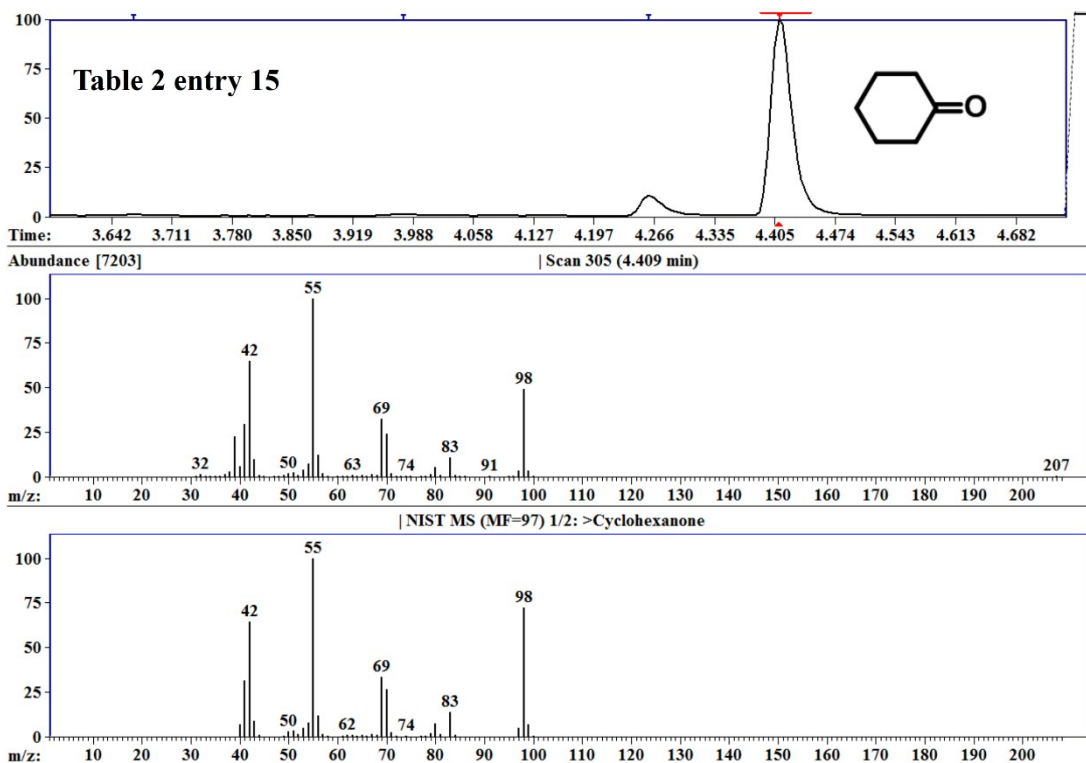

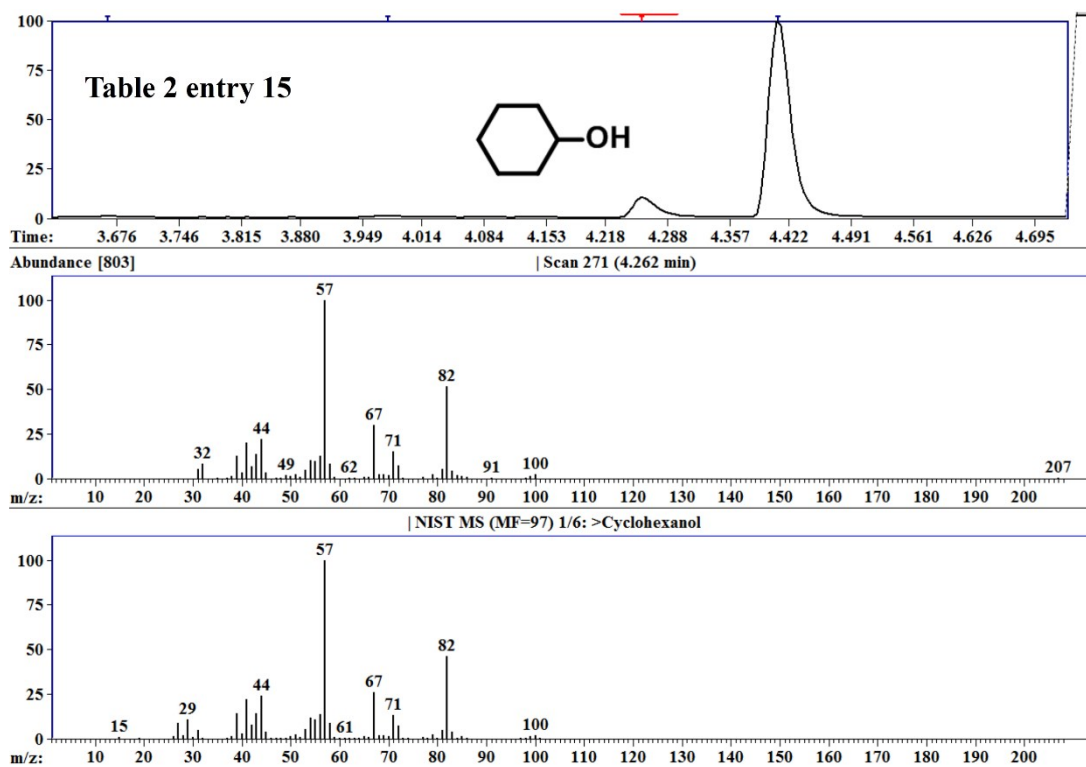

**Table 2 entry 16 (Table S2 data) NMR stack plot**

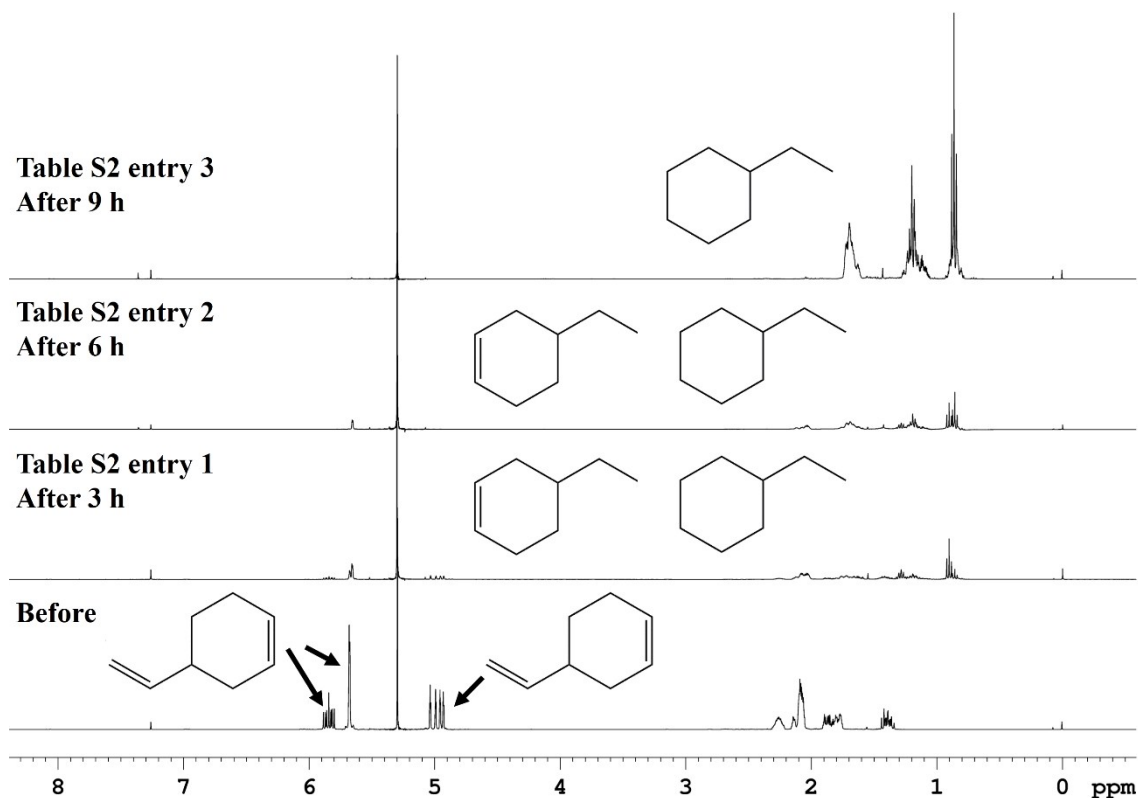

Table 2 entry 16 (Table S2 entry 1) GC-MS plot

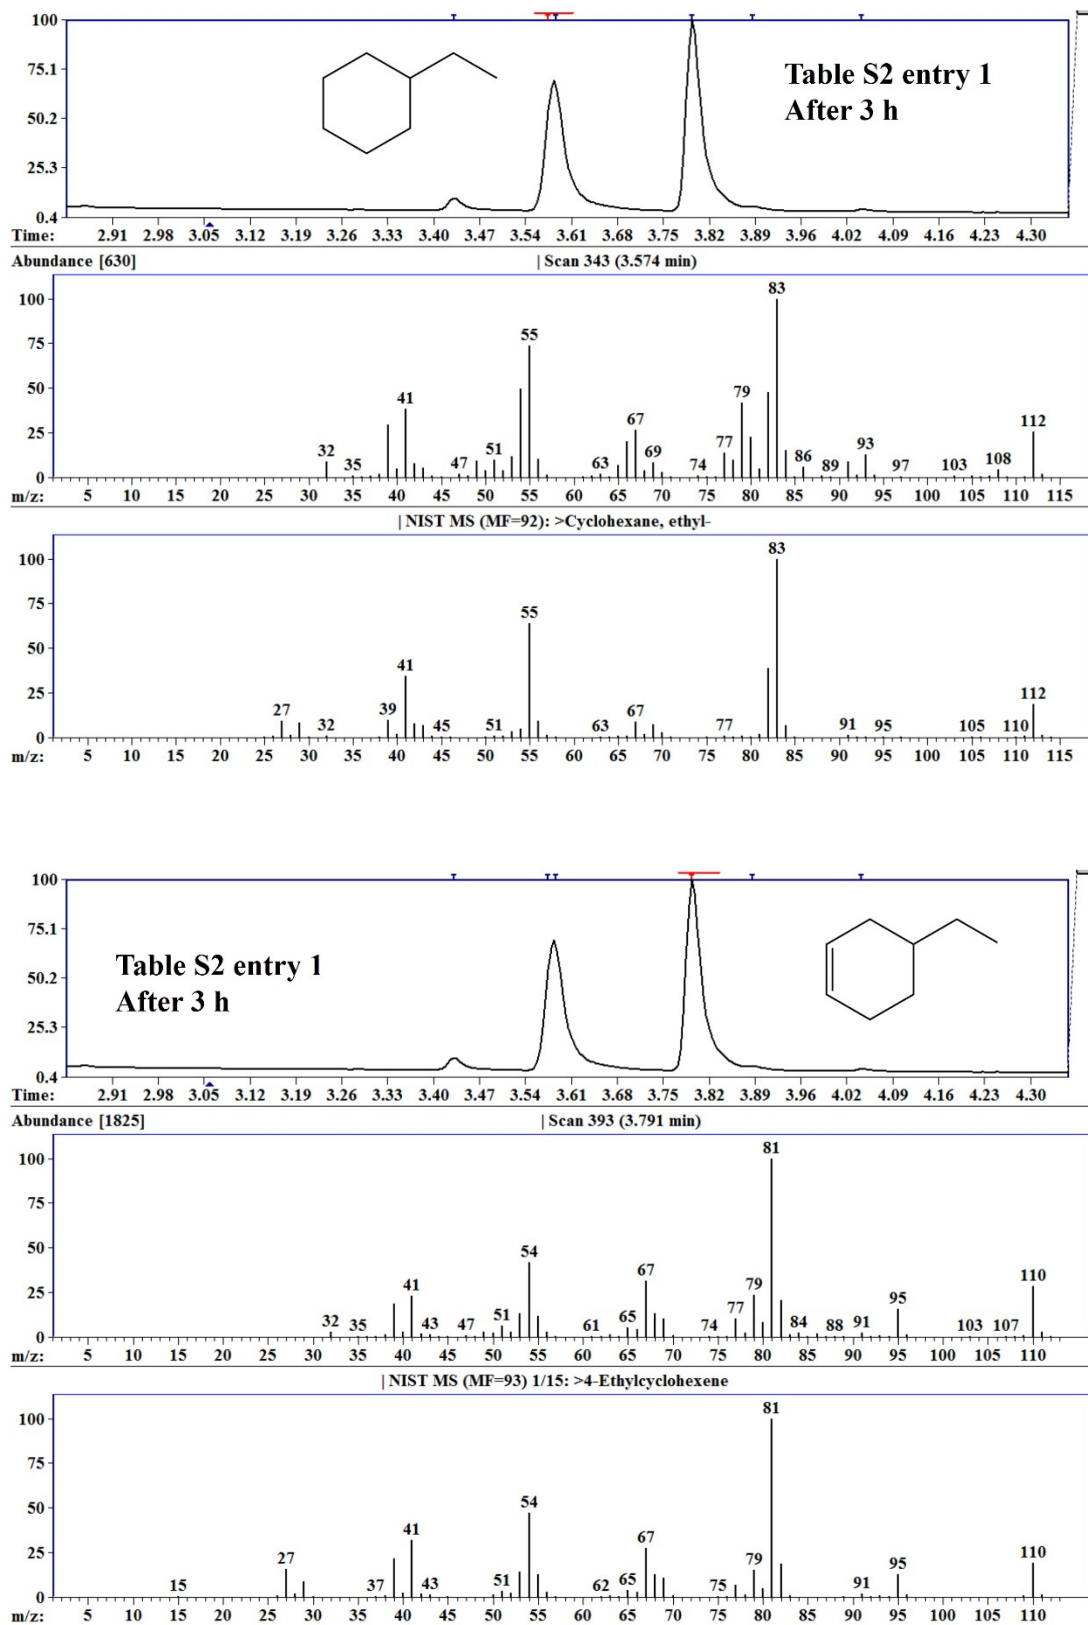

Table 2 entry 16 (Table S2 entry 2) GC-MS plot

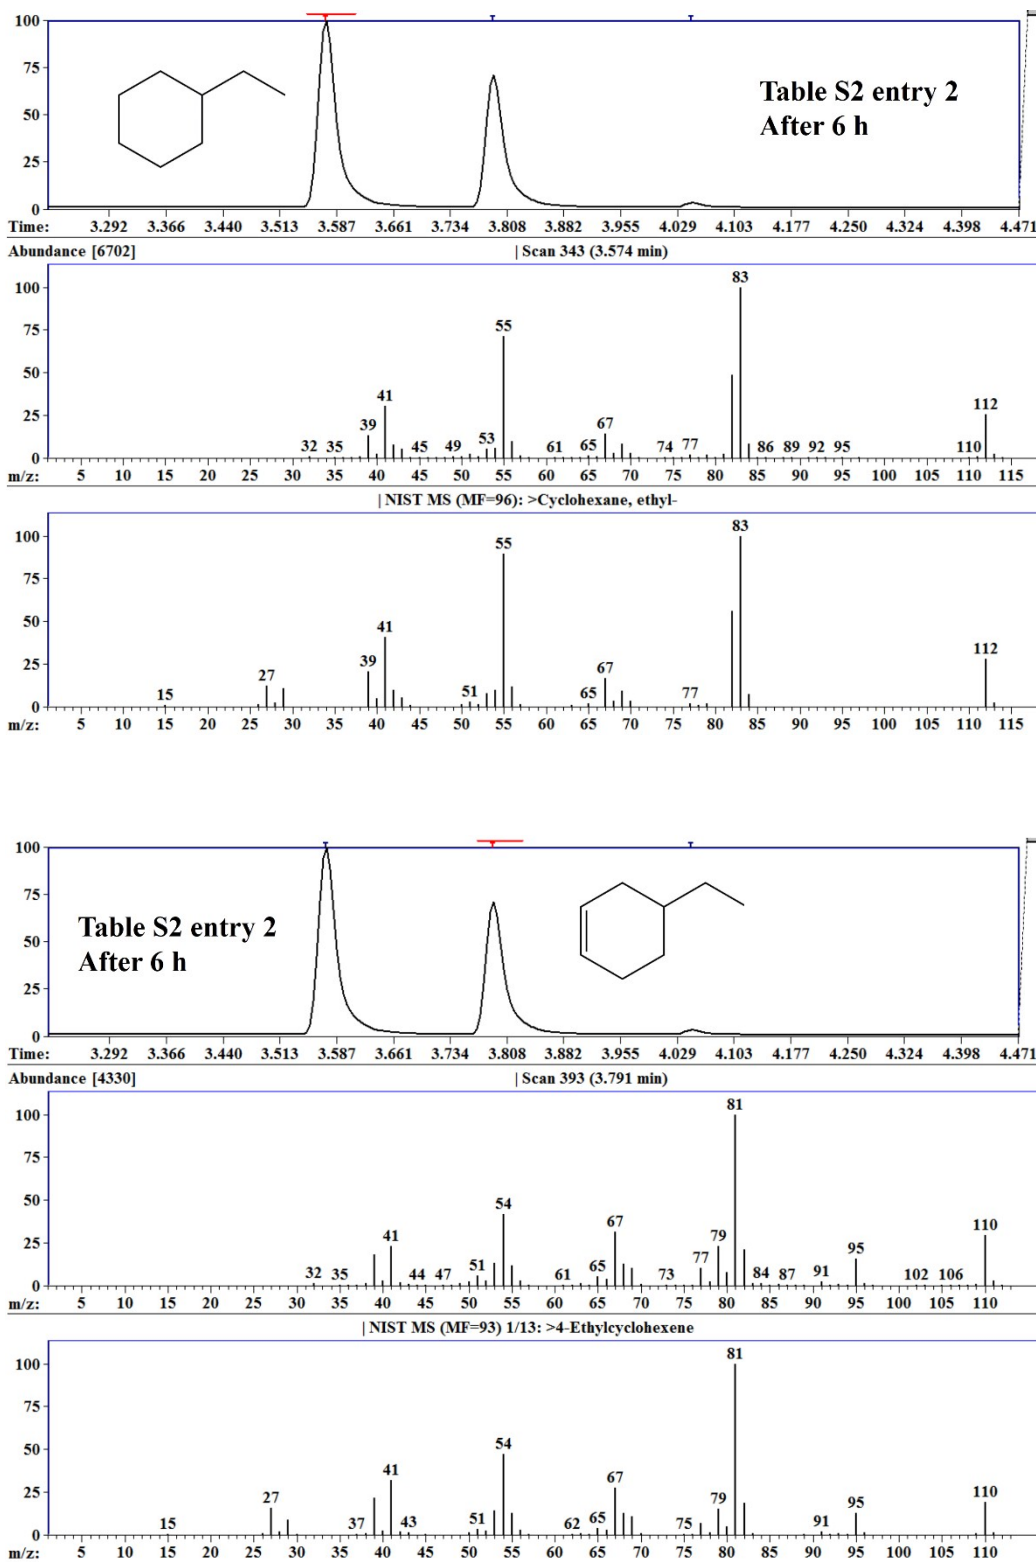

Table 2 entry 16 (Table S2 entry 3) GC-MS plot

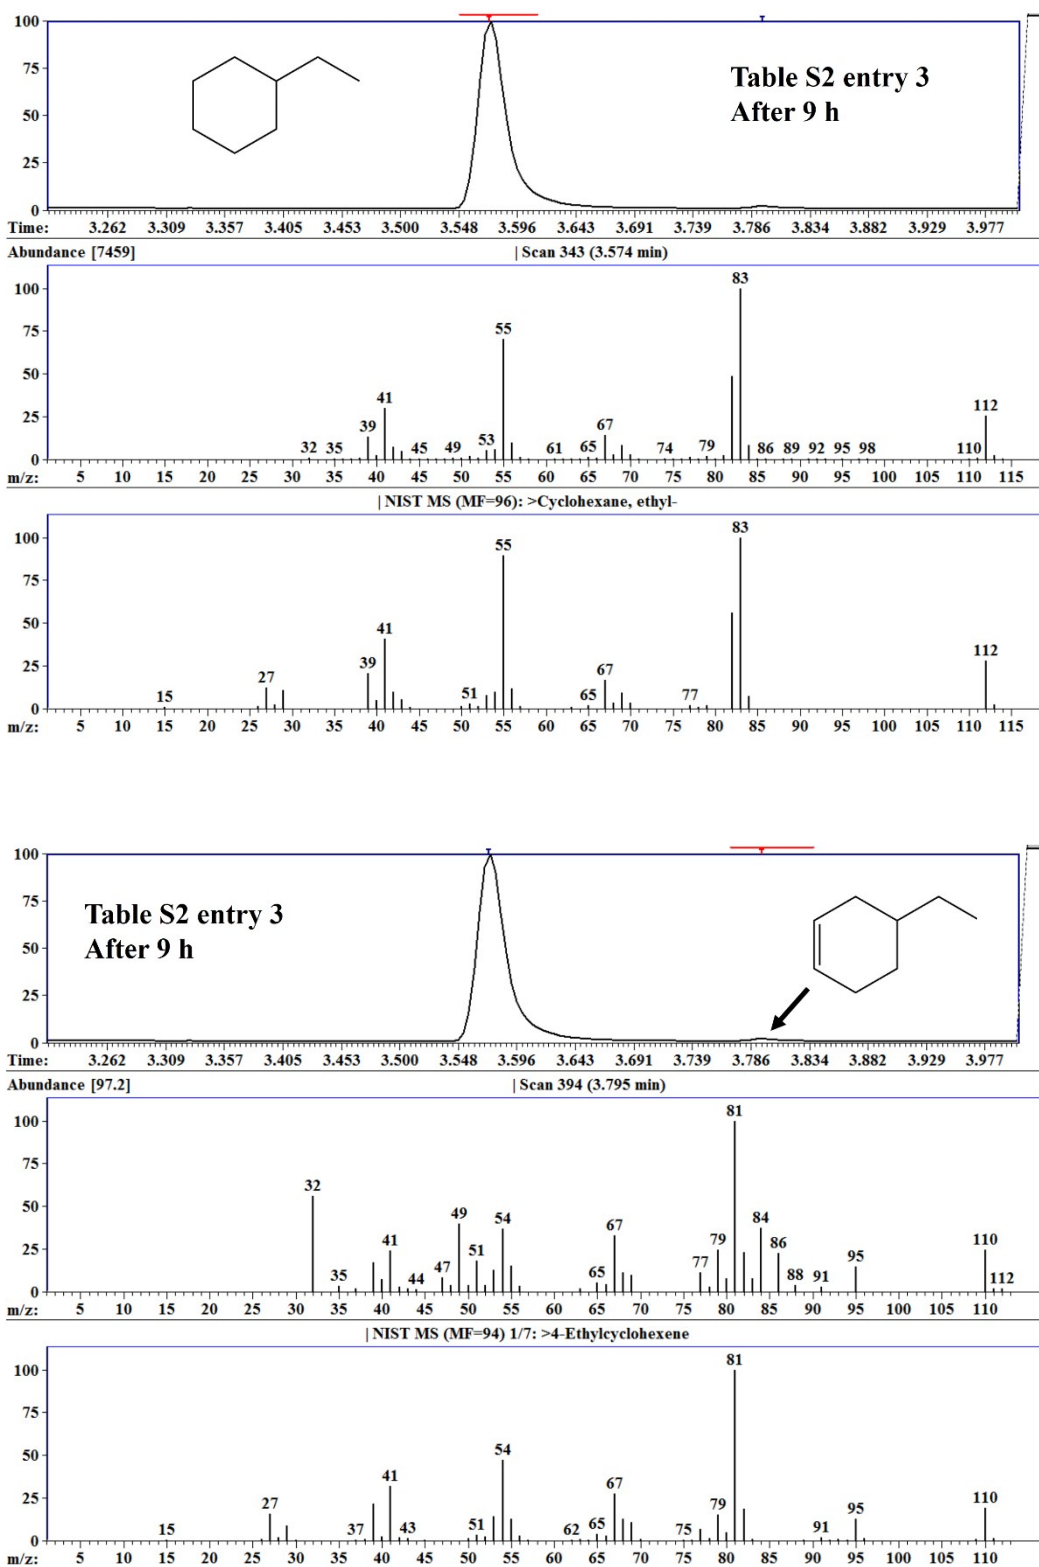

### Table 2 entry 17 NMR

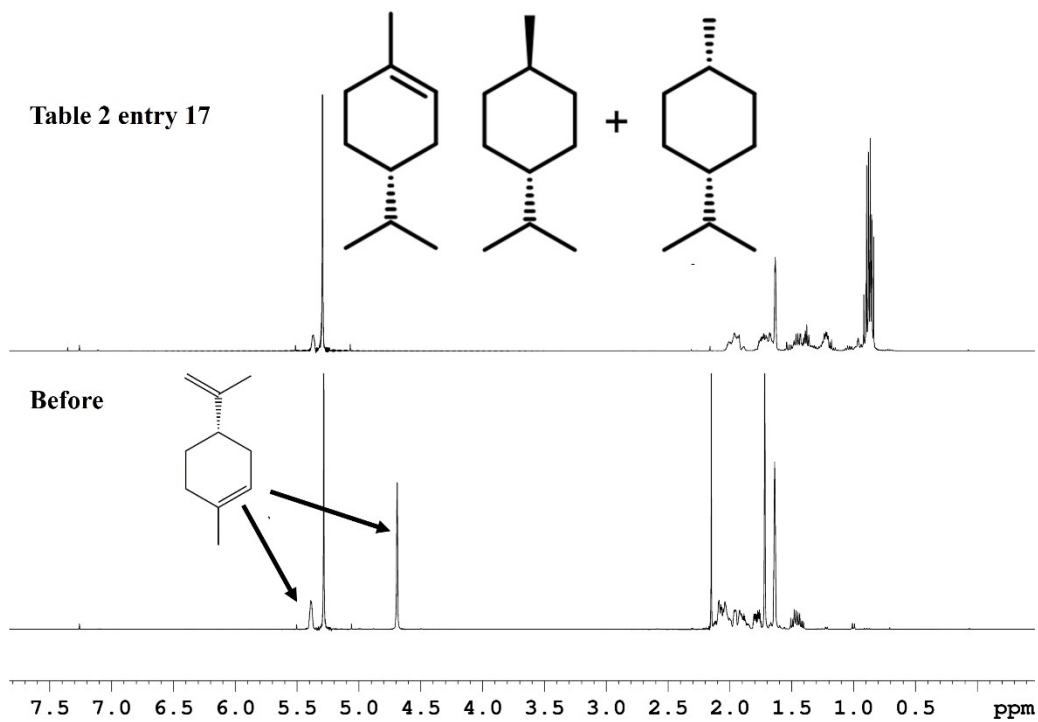

### Table 2 entry 17 GC-MS plot

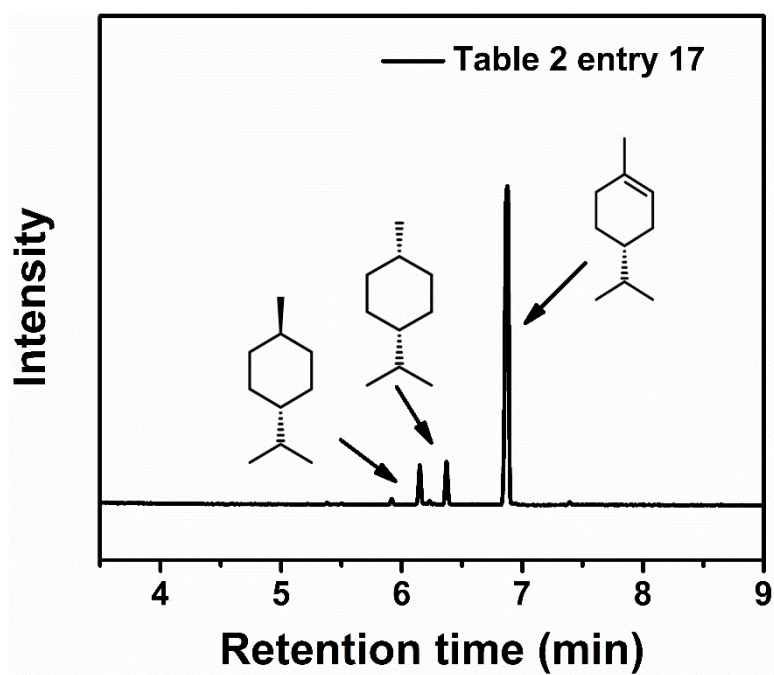

Similarity Search Results

Report View Compound Info Process Help

| Hit | Similar | Regi | Compound Name                                     | Mol Wt | Formula | Library   |
|-----|---------|------|---------------------------------------------------|--------|---------|-----------|
| 1   | 95      | (7)  | Cyclohexene, 1-methyl-4-(1-methylethyl)-, SS p-   | 138    | C10H18  | NIST11.lb |
| 2   | 91      |      | Bicyclo[4.1.0]heptane, 3,7,7-trimethyl-, [1S]-1-  | 138    | C10H18  | NIST11.lb |
| 3   | 90      |      | 3,5-Octadecene, 2,7-dimethyl-, (Z,Z)-, SS (3Z,5Z) | 138    | C10H18  | NIST11.lb |
| 4   | 89      |      | Cyclohexene, 1-(2-methylpropyl)-, SS 1-Isobutyl-  | 138    | C10H18  | NIST11.lb |
| 5   | 89      |      | Bicyclo[4.1.0]heptane, 3,7,7-trimethyl-, (1 alpha | 138    | C10H18  | NIST11.lb |
| 6   | 89      |      | Cyclopentane, 1-methyl-3-(2-methyl-1-propenyl)    | 138    | C10H18  | NIST11.lb |
| 7   | 89      |      | 3,5-Octadecene, 2,7-dimethyl-, (E,Z)-, SS (3E,5Z) | 138    | C10H18  | NIST11.lb |
| 8   | 89      |      | Cyclohexene, 3-methyl-6-(1-methylethyl)-, SS p-   | 138    | C10H18  | NIST11.lb |
| 9   | 89      |      | Bicyclo[4.1.0]heptane, 3,7,7-trimethyl-, [1S]-1-  | 138    | C10H18  | NIST11.lb |
| 10  | 89      |      | 1,1'-Bicyclopropyl, 2,2,2',2'-tetramethyl-        | 138    | C10H18  | NIST11.lb |
| 11  | 88      |      | 3-Nonyne, SS 3-C9H16, SS                          | 124    | C9H16   | NIST11.lb |
| 12  | 88      |      | 3-Nonyne, SS 2-C9H16, SS                          | 124    | C9H16   | NIST11.lb |
| 13  | 88      |      | Cyclooctane, 1,2-dimethyl-3-(1-methylethenyl)     | 138    | C10H18  | NIST11.lb |

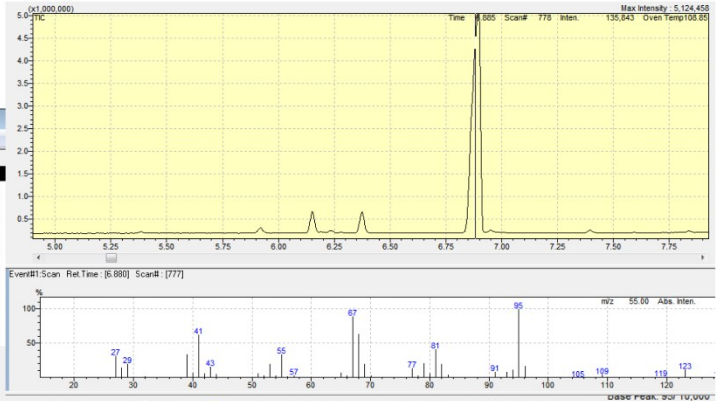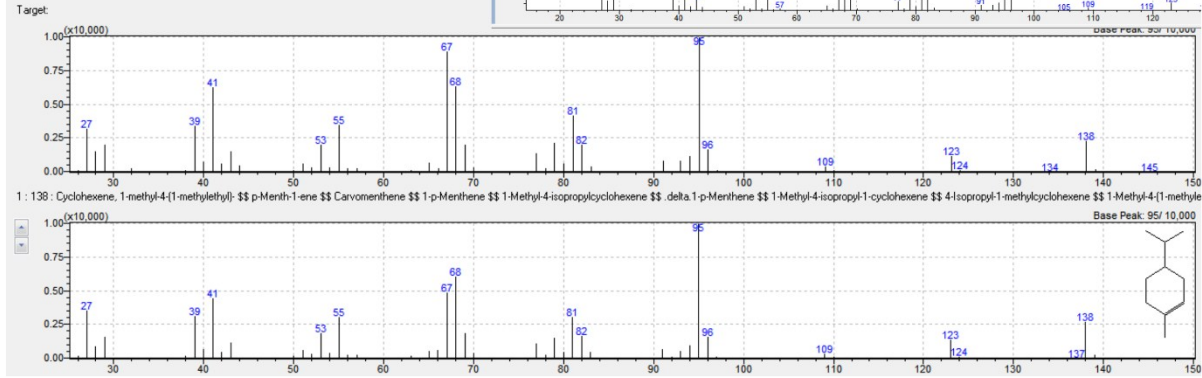

Similarity Search Results

Report View Compound Info Process Help

| Hit | Similar | Regi | Compound Name                                     | Mol Wt | Formula  | Library   |
|-----|---------|------|---------------------------------------------------|--------|----------|-----------|
| 1   | 88      | (7)  | 1-Methyl-4-(1-methylethyl)-cyclohexane, SS p-M    | 140    | C10H20   | NIST11.lb |
| 2   | 85      |      | Cyclohexane, 1-methyl-4-(1-methylethyl)-, trans   | 140    | C10H20   | NIST11.lb |
| 3   | 85      |      | m-Menthane, (1S,3S)-(+)-, SS m-Menthane, (1R      | 140    | C10H20   | NIST11.lb |
| 4   | 85      |      | Cyclohexane, 1-isopropyl-1-methyl-, SS 1-Isopro   | 140    | C10H20   | NIST11.lb |
| 5   | 83      |      | Oxalic acid, butyl cyclohexylmethyl ester         | 242    | C13H22O4 | NIST11.lb |
| 6   | 83      |      | Cyclopentane, 1,2-dimethyl-3-(1-methylethyl)-, S  | 140    | C10H20   | NIST11.lb |
| 7   | 82      |      | Cyclopentane, 1-hydroxymethyl-1,3-dimethyl-, S    | 128    | C9H18O   | NIST11.lb |
| 8   | 82      |      | Oxalic acid, cyclohexylmethyl ethyl ester         | 214    | C11H18O4 | NIST11.lb |
| 9   | 82      |      | Oxalic acid, cyclohexylmethyl propyl ester        | 228    | C12H20O4 | NIST11.lb |
| 10  | 82      |      | Cyclohexane, 1-methyl-2-ethyl-, SS 1-Methyl-2-    | 168    | C12H24   | NIST11.lb |
| 11  | 82      |      | Cyclohexane, 1-methyl-1-methyl-, SS 1-Methyl-1-e  | 126    | C9H18    | NIST11.lb |
| 12  | 82      |      | Cyclohexane, 1-methyl-3-ethyl-, SS 1-Methyl-3-    | 168    | C12H24   | NIST11.lb |
| 13  | 82      |      | Cyclohexane, 1-ethyl-4-methyl-, cis-, SS cis-1-Et | 126    | C9H18    | NIST11.lb |

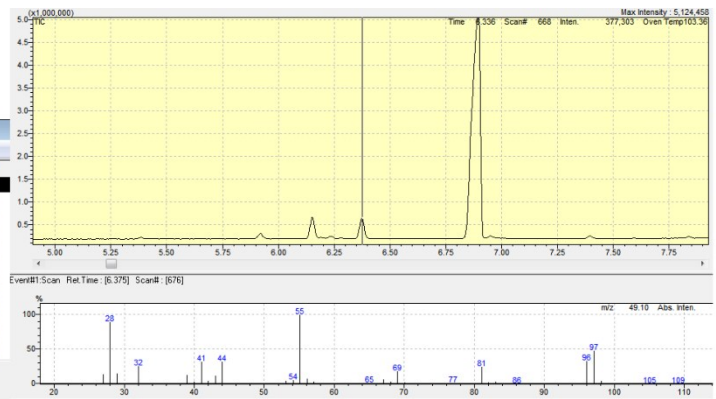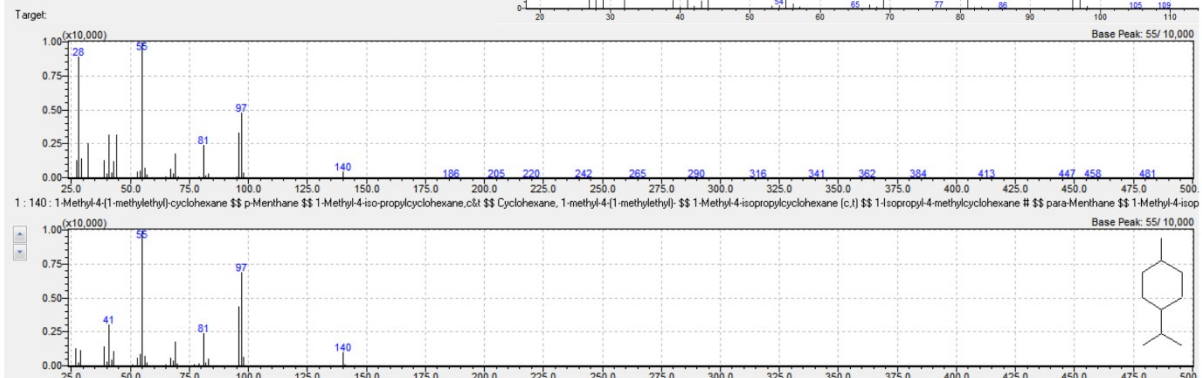



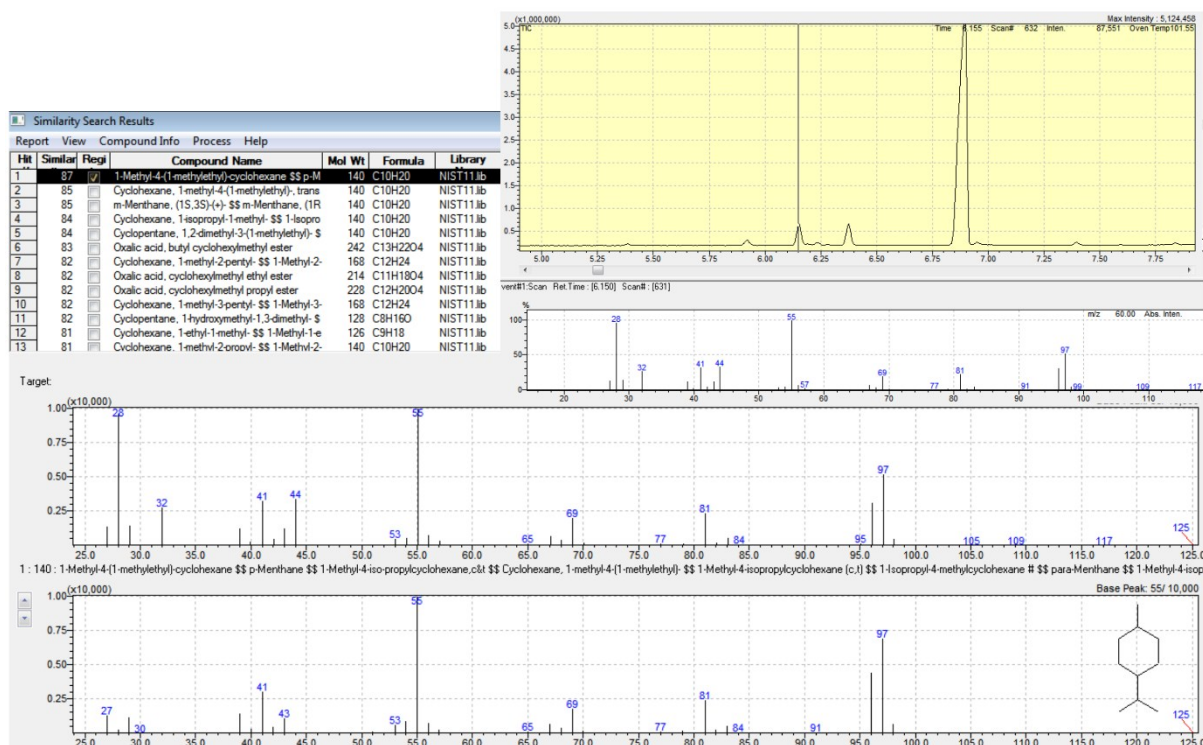

Gas chromatogram shows three peaks which correspond to the diastereomers of *p*-menthane (*cis* and *trans*) and 1-*p*-menthene. From the retention time and mass spectroscopic investigation the presence of *cis* and *trans* diastereomers could be ascertained. The stereochemistry of 1-*p*-menthene was established using specific rotation measurement. The specific rotation value for the starting material (*R*-limonene, 97%) is  $[\alpha]_D^{22} +113.4$  (*c* 2.0, CH<sub>2</sub>Cl<sub>2</sub>). Whereas, the specific rotation of product is  $[\alpha]_D^{22} +101.9$  (*c* 2.0, CH<sub>2</sub>Cl<sub>2</sub>), which matches with that of the *R* isomer of 1-*p*-menthene (83.5 % calculated from GC). Thus, there is retention of stereochemistry of the chiral center.

Table 2 entry 18 NMR stack plot

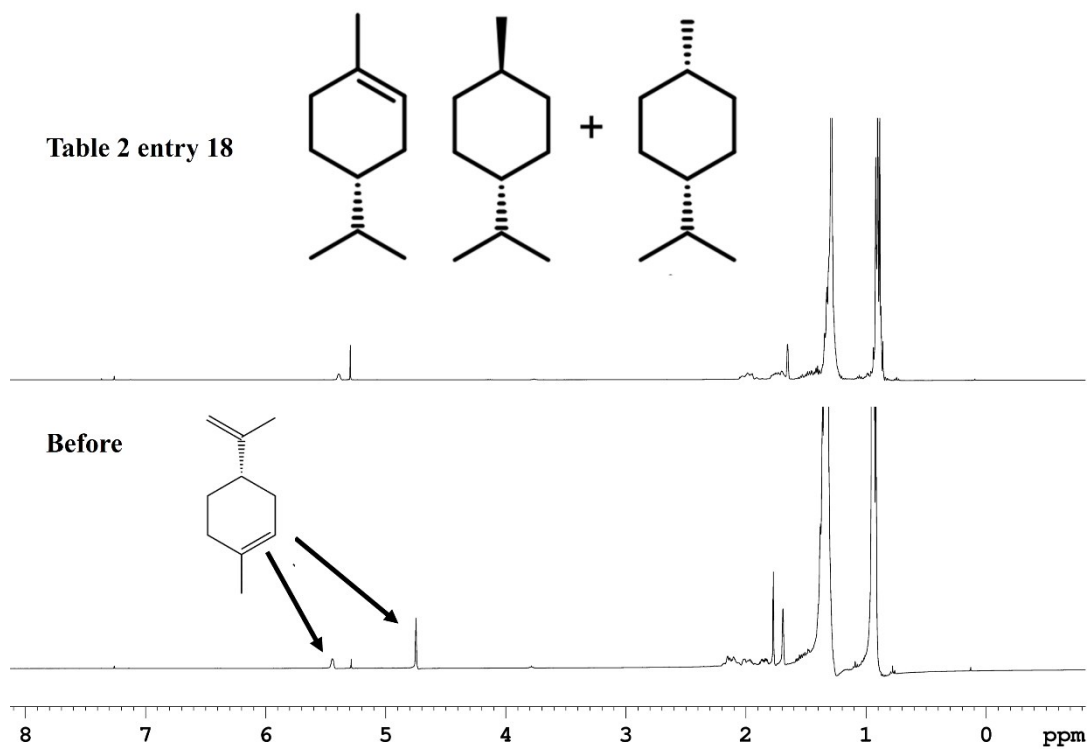

Table 2 entry 18 GC-MS plot

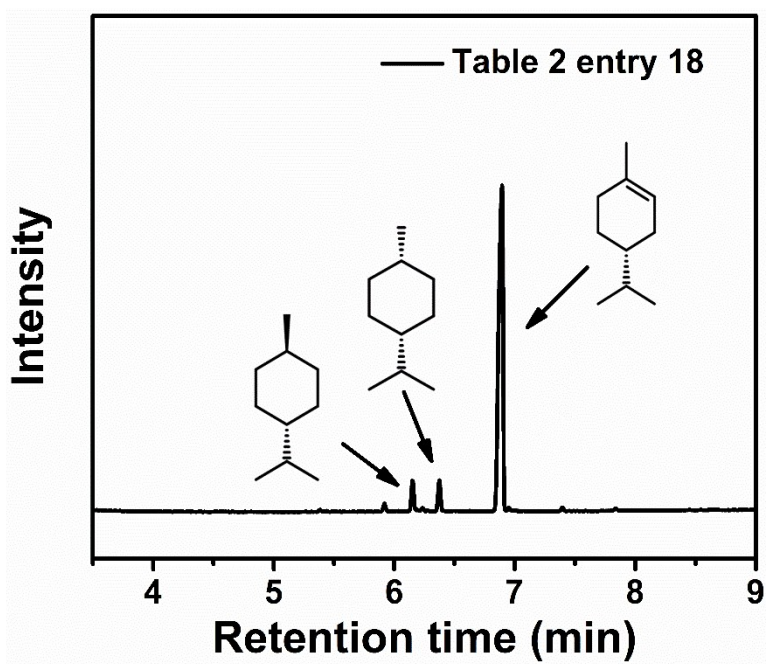

Similarity Search Results

| Hit | Similar | Regi | Compound Name                                         | Mol Wt | Formula | Library   |
|-----|---------|------|-------------------------------------------------------|--------|---------|-----------|
| 1   | 84      | (✓)  | Cyclohexene, 1-methyl-4-(1-methylethyl)-, (1R,2S)-    | 138    | C10H18  | NIST1111b |
| 2   | 89      |      | Bicyclo[4.1.0]heptane, 3,7,7-trimethyl-, (1S,2S)-     | 138    | C10H18  | NIST1111b |
| 3   | 89      |      | Bicyclo[4.1.0]heptane, 3,7,7-trimethyl-, (1S,1R)-     | 138    | C10H18  | NIST1111b |
| 4   | 89      |      | Bicyclo[4.1.0]heptane, 3,7,7-trimethyl-, (1R,2S)-     | 138    | C10H18  | NIST1111b |
| 5   | 89      |      | 3,5-Octadecene, 2,7-dimethyl-, (Z,Z)-, (3Z,5Z)        | 138    | C10H18  | NIST1111b |
| 6   | 88      |      | Cyclohexene, 1-(2-methylpropyl)-, (1R)-               | 138    | C10H18  | NIST1111b |
| 7   | 88      |      | Cyclohexene, 3-methyl-6-(1-methylethyl)-, (1R,2S)-    | 138    | C10H18  | NIST1111b |
| 8   | 88      |      | Cyclopentane, 1-methyl-3-(2-methyl-1-propenyl)-       | 138    | C10H18  | NIST1111b |
| 9   | 88      |      | 3-Norbornene, 2,7-dimethyl-, (E,Z)-, (3E,5Z)          | 124    | C9H16   | NIST1111b |
| 10  | 88      |      | 3,5-Octadecene, 2,7-dimethyl-, (E,Z)-, (3E,5Z)        | 138    | C10H18  | NIST1111b |
| 11  | 87      |      | 1,1'-Bicyclopropyl, 2,2,2',2'-tetramethyl-, (1R,1'R)- | 138    | C10H18  | NIST1111b |
| 12  | 87      |      | Cyclopentane, 1,2-dimethyl-3-(1-methylethyl)-         | 138    | C10H18  | NIST1111b |
| 13  | 87      |      | Cyclohexene, 1-methyl-4-(1-methylethyl)-, (1R,2S)-    | 138    | C10H18  | NIST1111b |

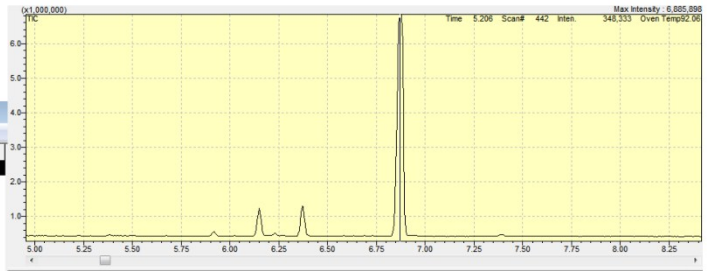

Target:

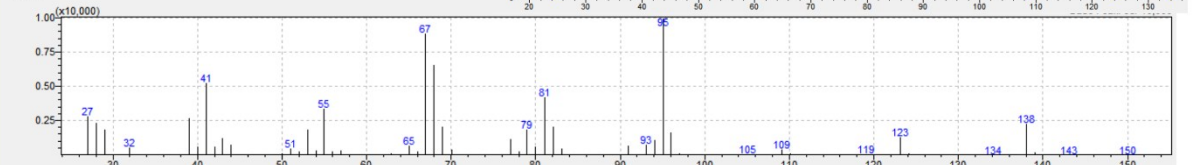

1 : 138: Cyclohexene, 1-methyl-4-(1-methylethyl)-, (1R,2S)-; p-Menth-1-ene; Camphene; 1-p-Menthene; 1-Methyl-4-isopropylcyclohexene; delta-1-p-Menthene; 1-Methyl-4-isopropyl-1-cyclohexene; 4-isopropyl-1-methylcyclohexene; 1-Methyl-4-(1-methyl-2-propenyl)cyclohexene

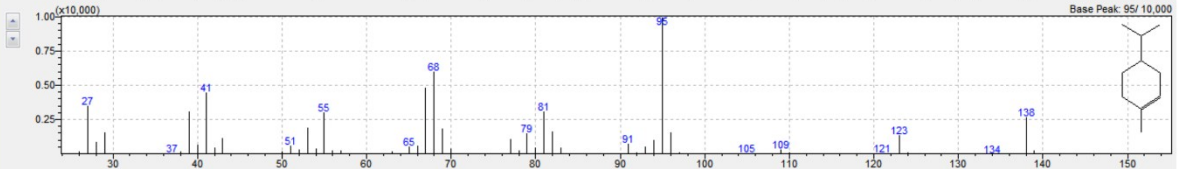

Similarity Search Results

| Hit | Similar | Regi | Compound Name                                           | Mol Wt | Formula  | Library   |
|-----|---------|------|---------------------------------------------------------|--------|----------|-----------|
| 1   | 84      | (✓)  | 1-Methyl-4-(1-methylethyl)cyclohexane, (1R,2S)-         | 140    | C10H20   | NIST1111b |
| 2   | 83      |      | Cyclohexane, 1-methyl-4-(1-methylethyl)-, trans-        | 140    | C10H20   | NIST1111b |
| 3   | 83      |      | m-Menthane, (1S,3S)-, (+)-, (1R)                        | 140    | C10H20   | NIST1111b |
| 4   | 82      |      | Cyclohexane, 1-isopropyl-1-methyl-, (1R)-               | 140    | C10H20   | NIST1111b |
| 5   | 82      |      | Oxalic acid, butyl cyclohexylmethyl ester               | 242    | C13H22O4 | NIST1111b |
| 6   | 81      |      | Cyclopentane, 1,2-dimethyl-3-(1-methylethyl)-, (1R,2S)- | 140    | C10H20   | NIST1111b |
| 7   | 81      |      | Oxalic acid, cyclohexylmethyl ethyl ester               | 214    | C11H18O4 | NIST1111b |
| 8   | 80      |      | Cyclopentane, 1-hydroxymethyl-1,3-dimethyl-, (1R,2S)-   | 128    | C8H16O   | NIST1111b |
| 9   | 80      |      | Cyclohexane, 1-ethyl-1-methyl-, (1R)-                   | 126    | C9H18    | NIST1111b |
| 10  | 80      |      | Cyclohexane, 1-methyl-3-propyl-, (1R)-                  | 168    | C12H24   | NIST1111b |
| 11  | 80      |      | Cyclohexane, 1-ethyl-2-methyl-, (1R)-                   | 126    | C9H18    | NIST1111b |
| 12  | 80      |      | Oxalic acid, cyclohexylmethyl propyl ester              | 228    | C12H20O4 | NIST1111b |
| 13  | 79      |      | Cyclohexane, 1-methyl-2-ethyl-, (1R)-                   | 168    | C12H24   | NIST1111b |

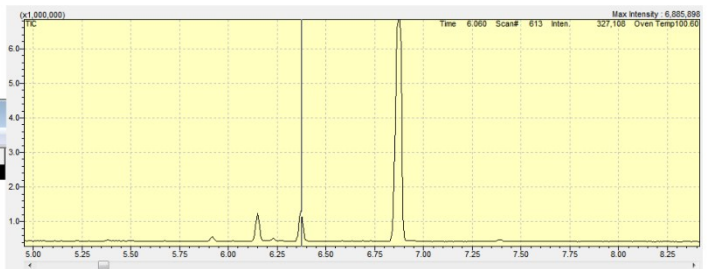

Target:

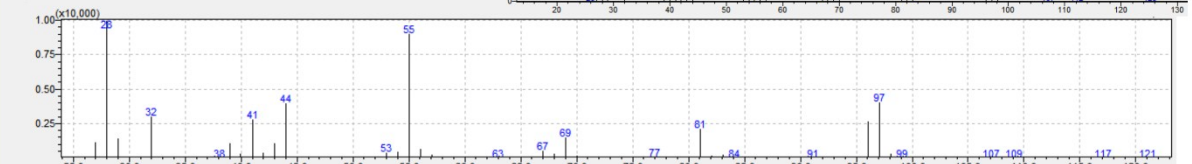

1 : 140: 1-Methyl-4-(1-methylethyl)cyclohexane; p-Menthane; 1-Methyl-4-isopropylcyclohexane, (1R,2S)-; Cyclohexane, 1-methyl-4-(1-methylethyl)-, (1R,2S)-; 1-Methyl-4-isopropylcyclohexane; (1R,2S)-1-isopropyl-4-methylcyclohexane; para-Menthane; 1-Methyl-4-(1-methyl-2-propenyl)cyclohexane

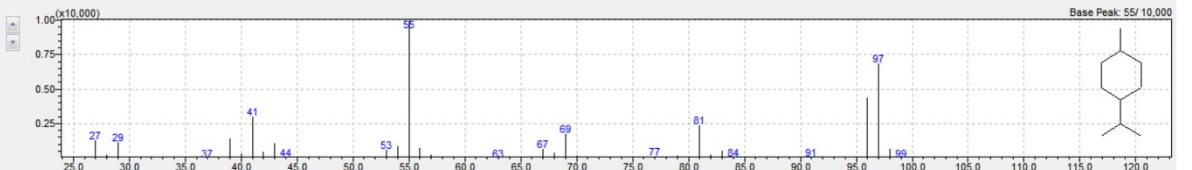

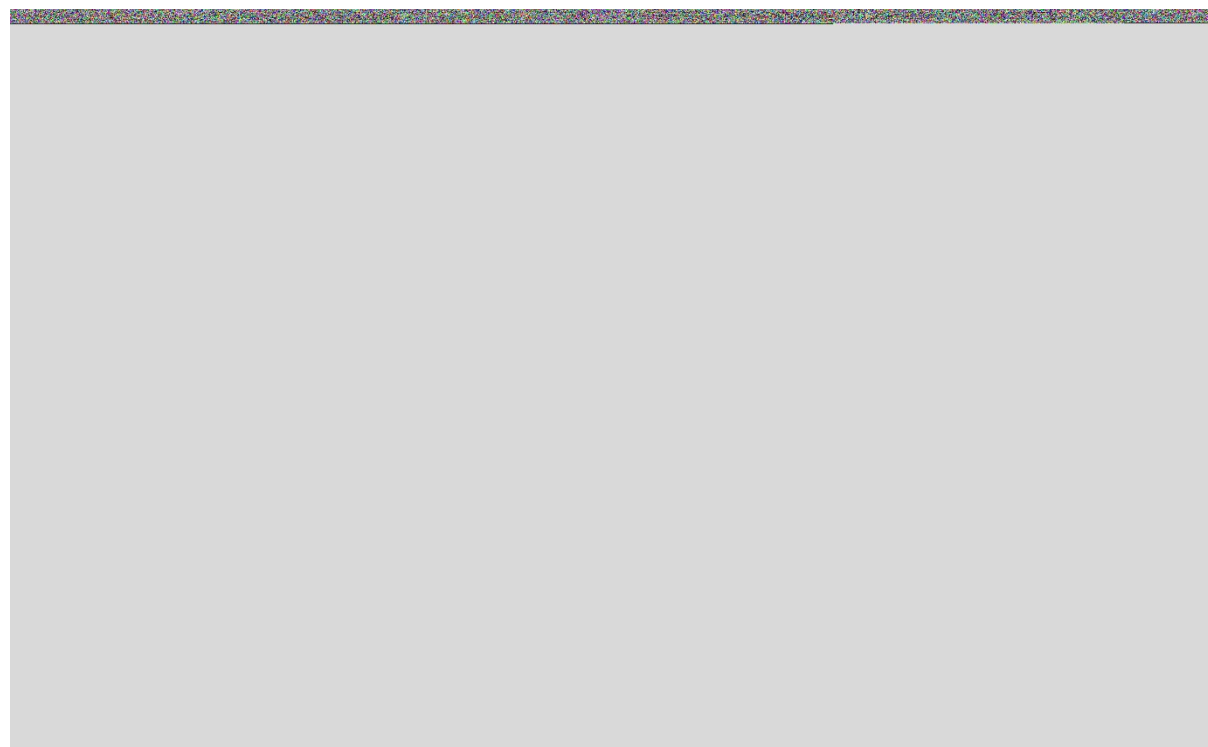

Gas chromatogram shows three peaks, corresponding to the diastereomers of *p*-menthane (*cis* and *trans*) and 1-*p*-menthene. From the retention time and mass spectroscopic investigation the presence of *cis* and *trans* diastereomers could be ascertained. The stereochemistry of 1-*p*-menthene was established using specific rotation measurement. The specific rotation value for the starting material (*R*-limonene, 97%) is  $[\alpha]_{\text{D}}^{22} +113.4$  (*c* 2.0, CH<sub>2</sub>Cl<sub>2</sub>). Whereas, specific rotation of the product is  $[\alpha]_{\text{D}}^{22} +103.8$  (*c* 2.0, CH<sub>2</sub>Cl<sub>2</sub>), which matches with that of the *R* isomer of 1-*p*-menthene (87.9 % calculated from GC). Thus, the stereochemistry of the chiral center was preserved.

Table 2 entry 19 GC-MS plot

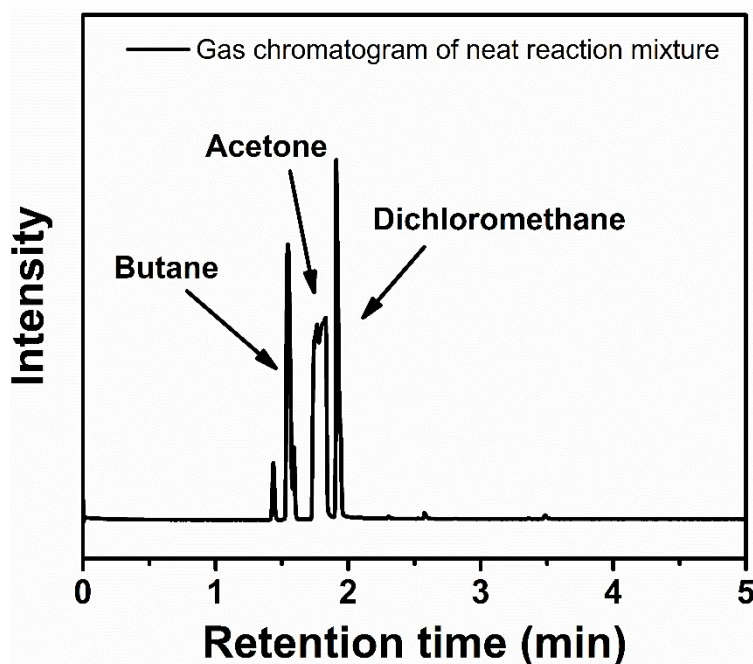

Similarity Search Results

| Hit | Similar | Reg                                 | Compound Name                                          | Mol Wt | Formula  | Library   |
|-----|---------|-------------------------------------|--------------------------------------------------------|--------|----------|-----------|
| 1   | 92      | <input checked="" type="checkbox"/> | Butane \$\$ n-Butane \$\$ Diethyl \$\$ Freon 600       | 58     | C4H10    | NIST11.lb |
| 2   | 89      | <input type="checkbox"/>            | Pentane, 2-bromo- \$\$ 2-Bromopentane \$\$ 2-P         | 150    | C5H11Br  | NIST11.lb |
| 3   | 88      | <input type="checkbox"/>            | Butane, 2-methyl- \$\$ iso-Pentane \$\$ 1,1,2-Tri      | 72     | C5H12    | NIST11.lb |
| 4   | 87      | <input type="checkbox"/>            | Amyl nitrite \$\$ n-Pentyl nitrite \$\$ n-Amyl nitrite | 117    | C5H11NO2 | NIST11.lb |
| 5   | 87      | <input type="checkbox"/>            | Propane, 1-nitro- \$\$ 1-Nitropropane \$\$ n-C3H       | 89     | C3H7NO2  | NIST11.lb |
| 6   | 86      | <input type="checkbox"/>            | Oxetane, 2,2-dimethyl- \$\$ Butane, 1,3-epoxy-3        | 86     | C5H10O   | NIST11.lb |
| 7   | 86      | <input type="checkbox"/>            | 1-Propanesulfonyl chloride \$\$ Propane-1-sulfo        | 142    | C3H7O2S  | NIST11.lb |
| 8   | 86      | <input type="checkbox"/>            | Butane, 1-fluoro- \$\$ Butyl fluoride \$\$ 1-Fluorob   | 76     | C4H9F    | NIST11.lb |
| 9   | 86      | <input type="checkbox"/>            | Heptane \$\$ n-Heptane \$\$ Dipropylmethane \$         | 100    | C7H16    | NIST11.lb |
| 10  | 86      | <input type="checkbox"/>            | Pentanal, 2-methyl- \$\$ Valeraldehyde, 2-methy        | 100    | C6H12O   | NIST11.lb |
| 11  | 85      | <input type="checkbox"/>            | Nitrous acid, butyl ester \$\$ n-Butyl nitrite \$\$ Bu | 103    | C4H9NO2  | NIST11.lb |
| 12  | 85      | <input type="checkbox"/>            | Butane, 1-isocyanato- \$\$ Isocyanic acid, butyl       | 99     | C5H9NO   | NIST11.lb |
| 13  | 85      | <input type="checkbox"/>            | Isobutane \$\$ Propane, 2-methyl- \$\$ Trimethyl       | 58     | C4H10    | NIST11.lb |

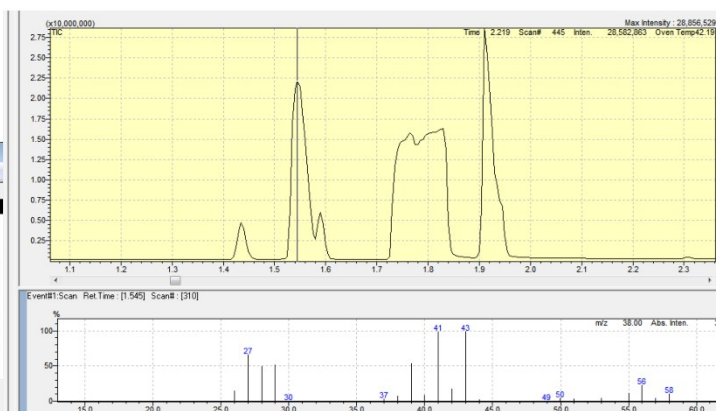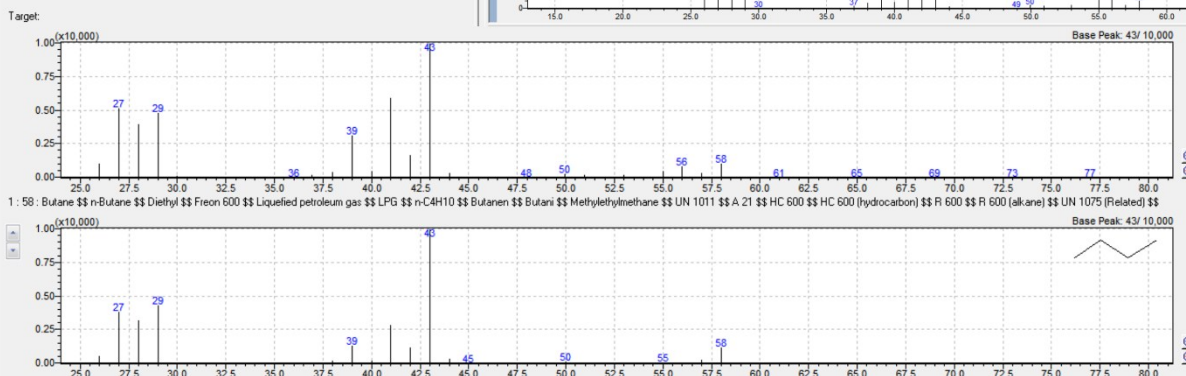

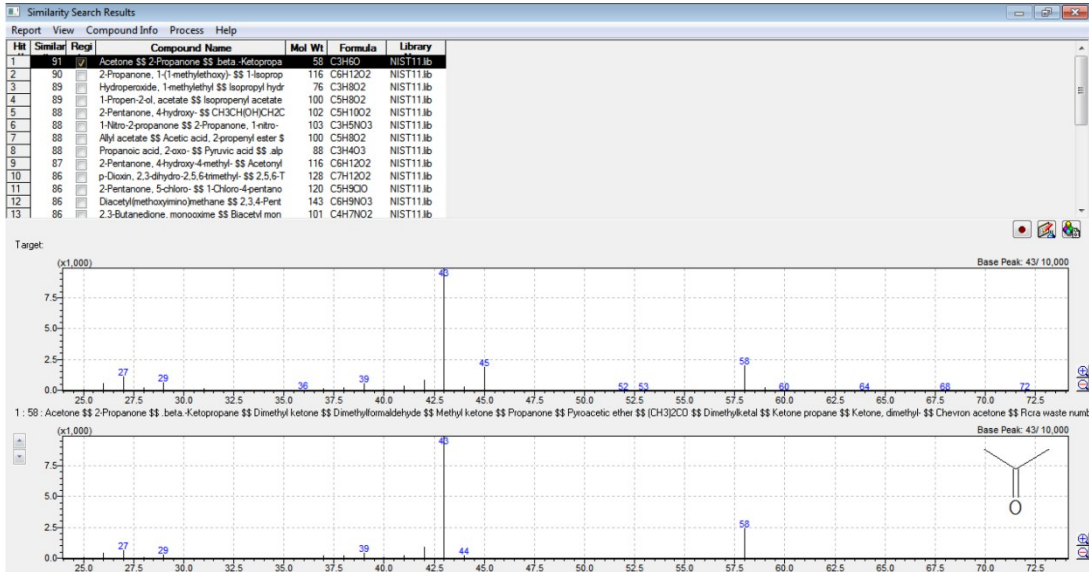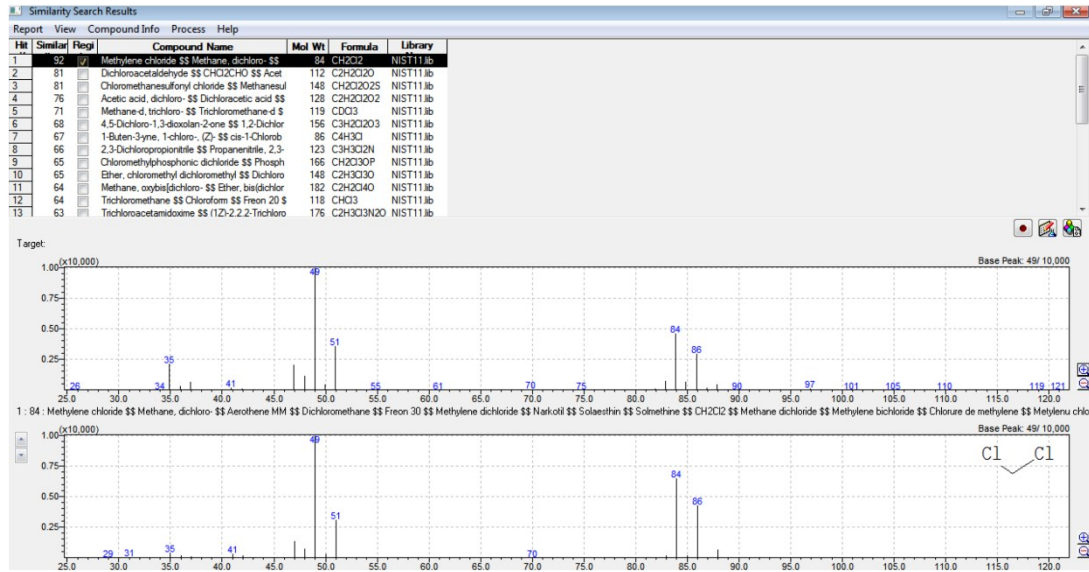

## Catalyst recyclability test

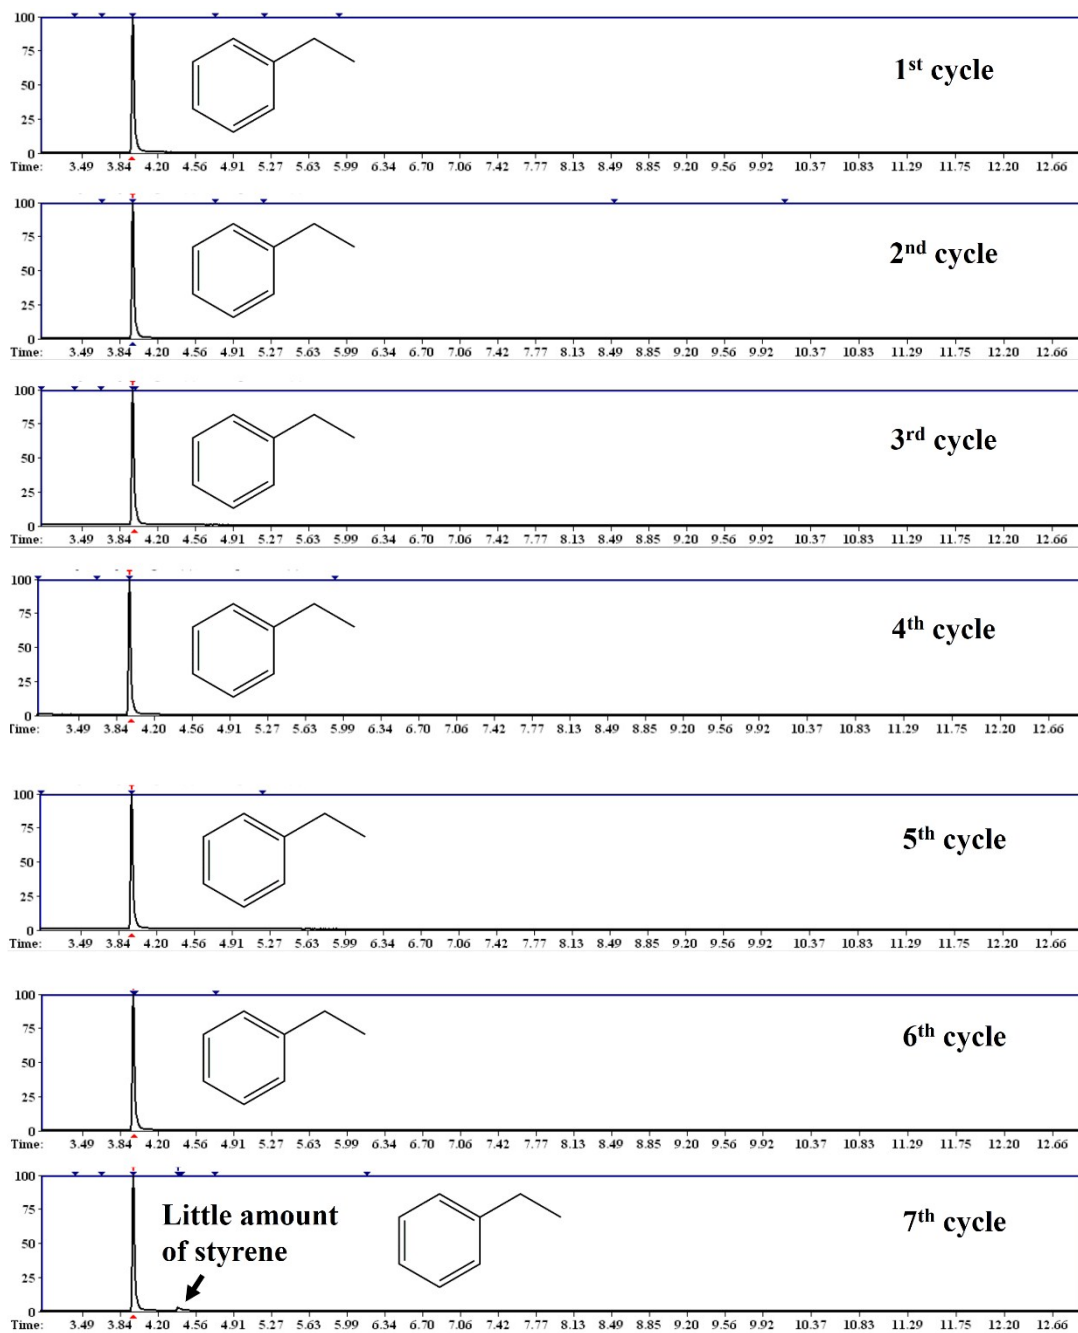

**Table S3 (hydrogenation of styrene using annealed iridium nanosponges)**

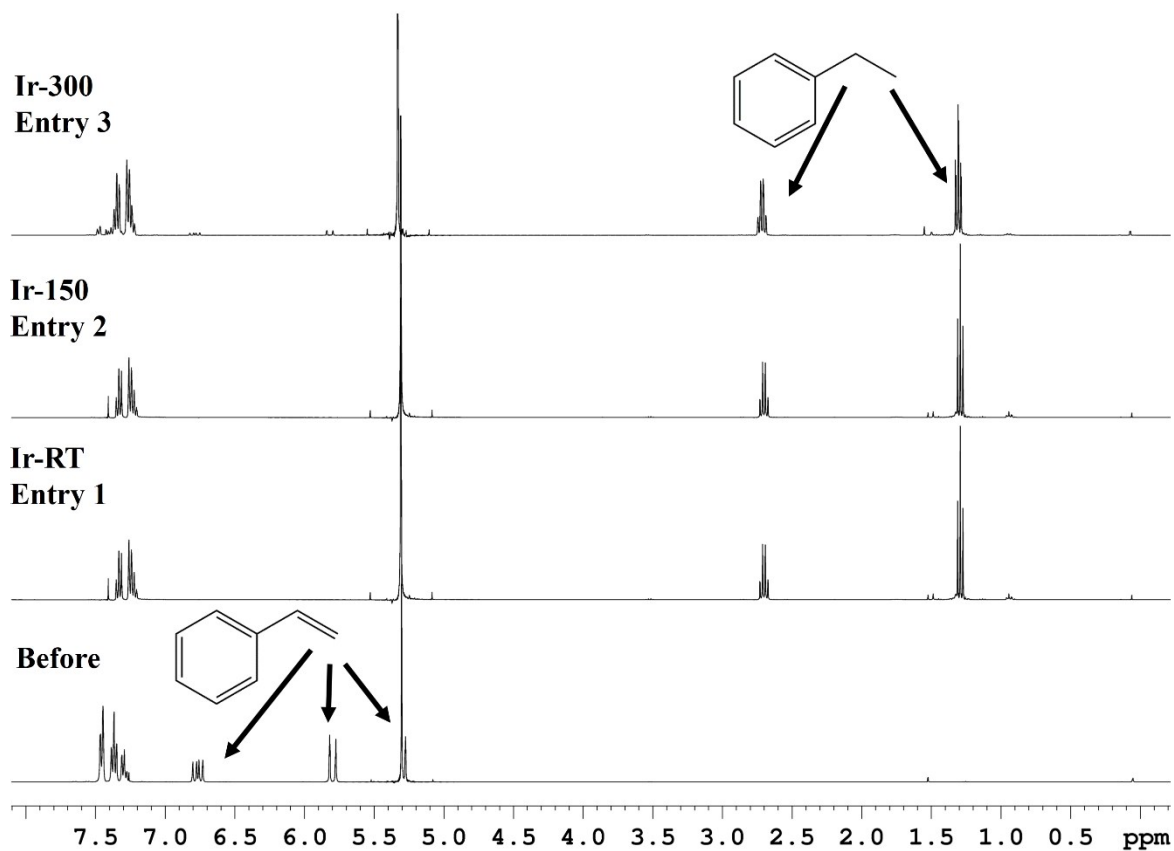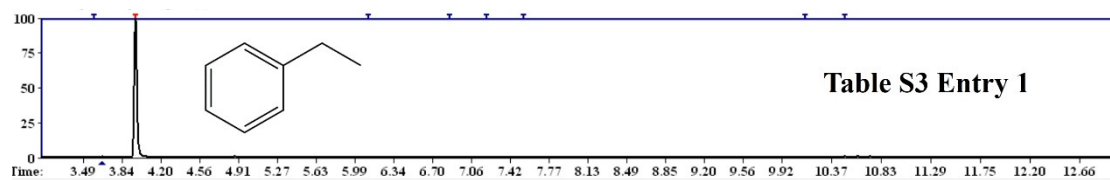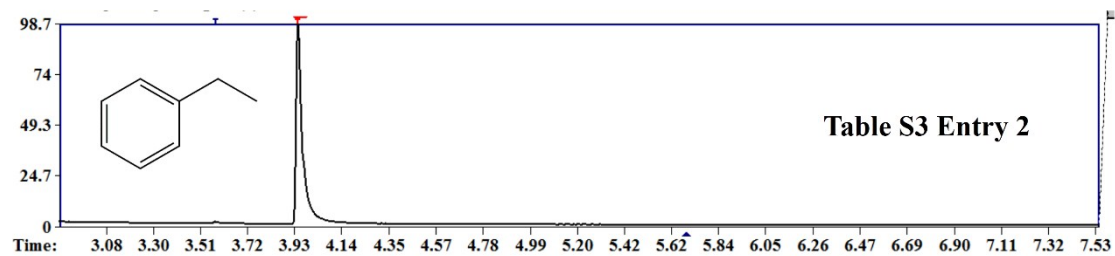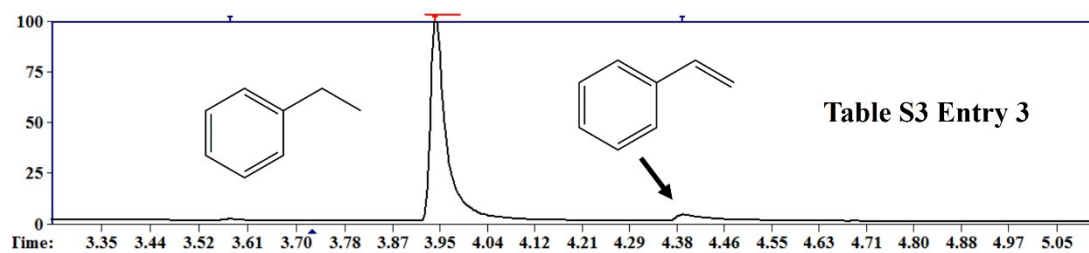



## Catalyst poisoning experiment with CO

### Hydrogenation of styrene using pre-poisoned iridium catalyst

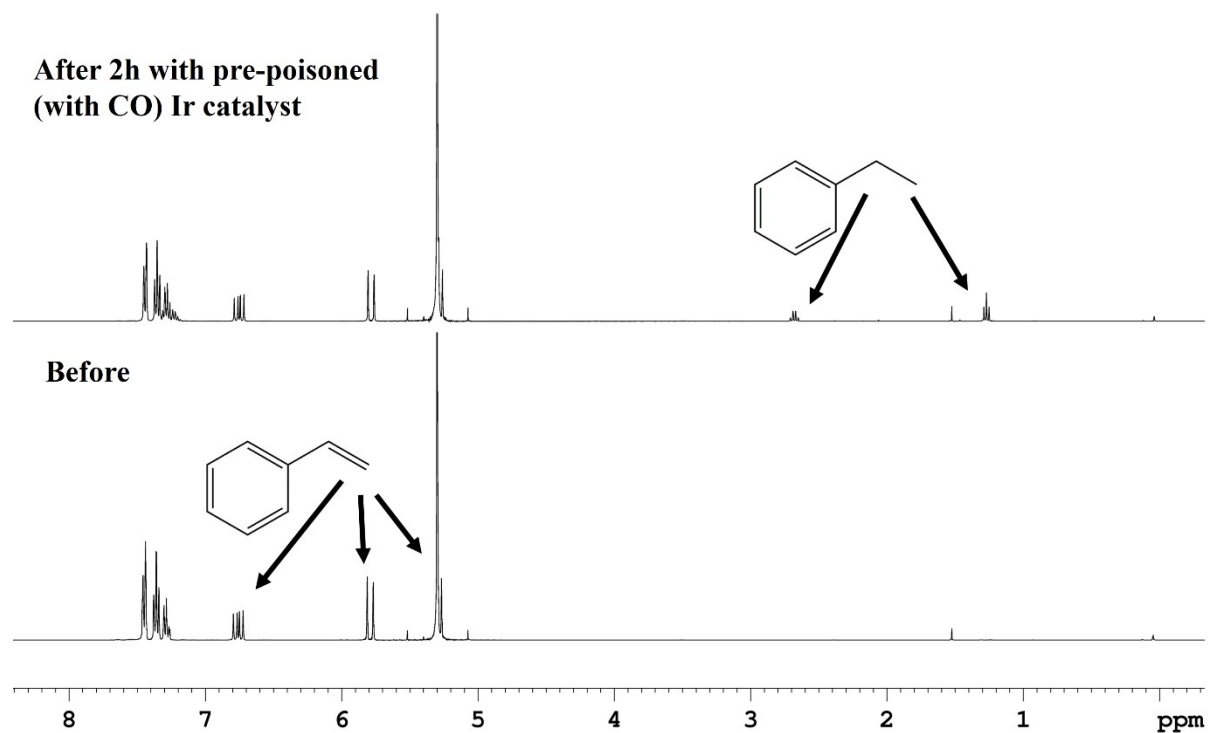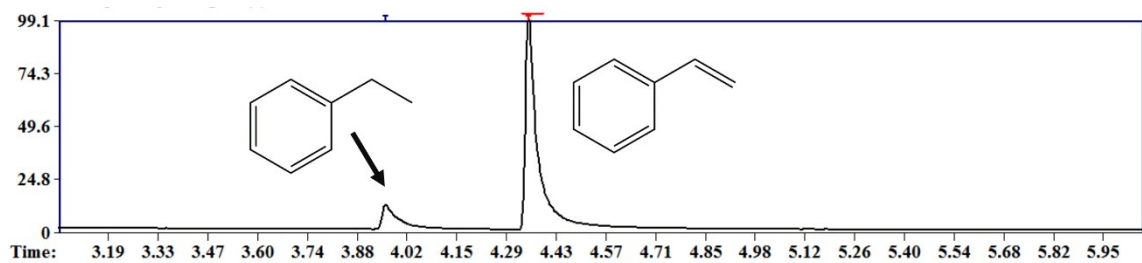

# Hydrogenation of styrene using post-poisoned iridium catalyst (with CO) after 1<sup>st</sup> step

2<sup>nd</sup> step - post-poisoned (with CO) Ir catalyst after 1<sup>st</sup> step then reaction carried out for 2 h

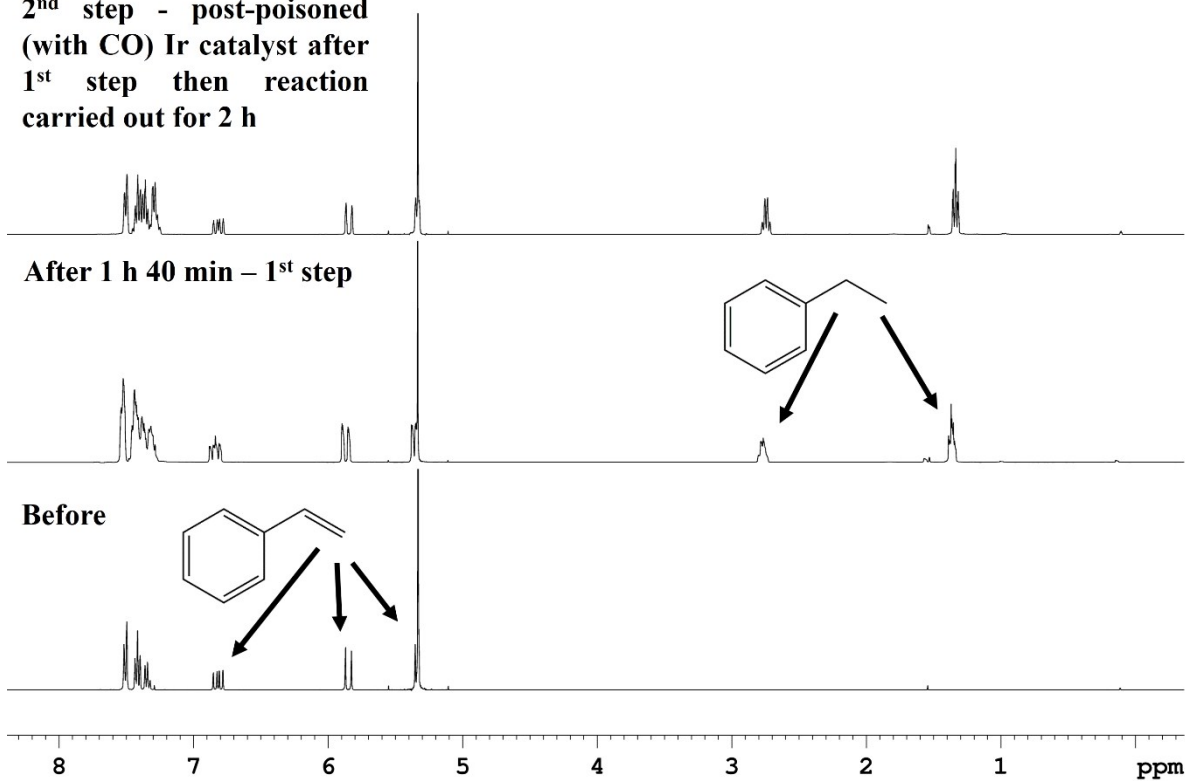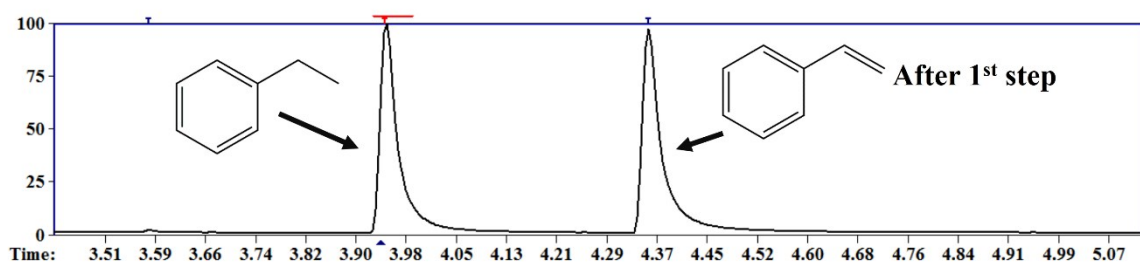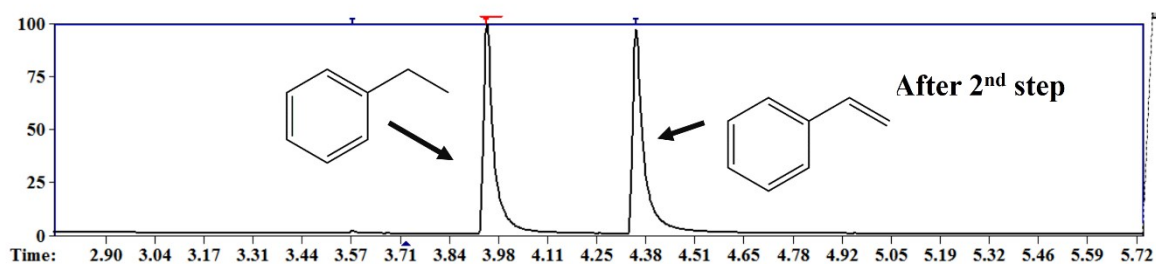

**Table S4 (hydrogenation styrene with iridium nanospheres synthesized from different precursors)**

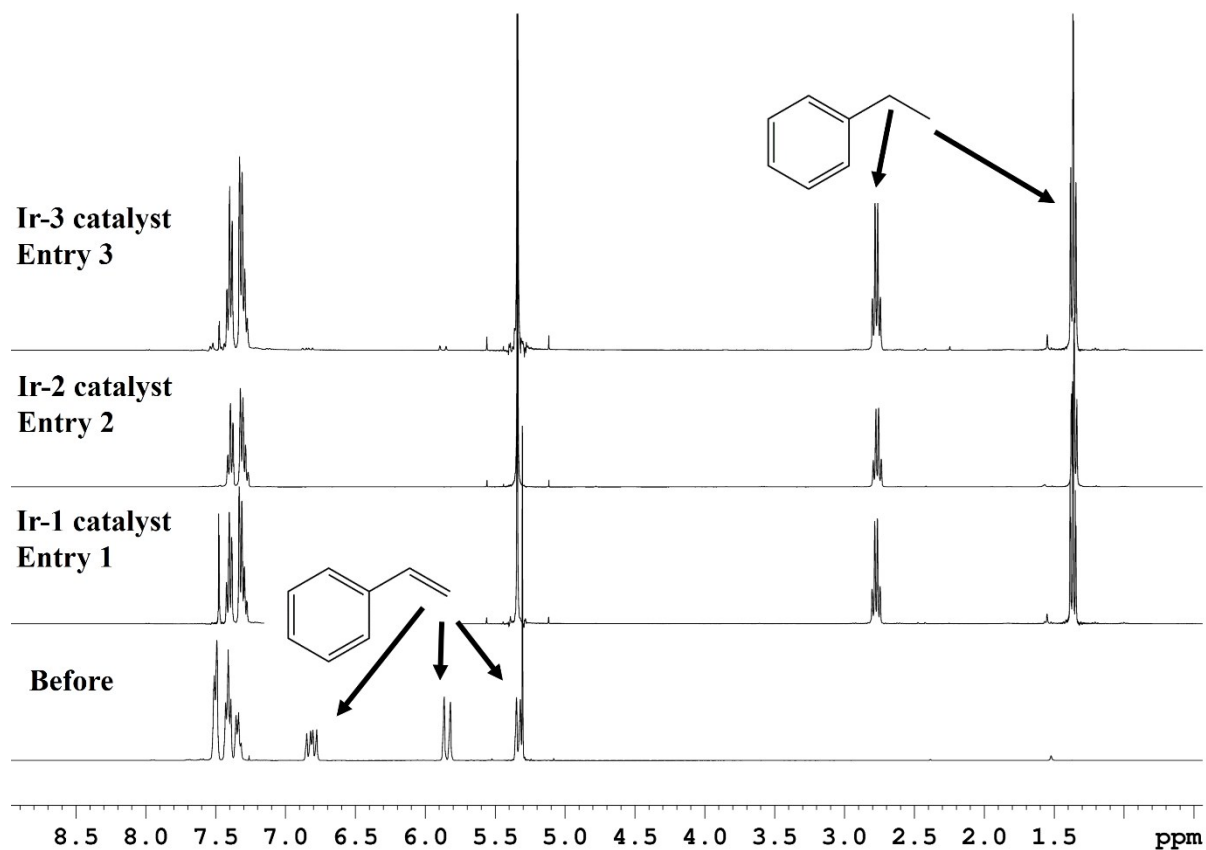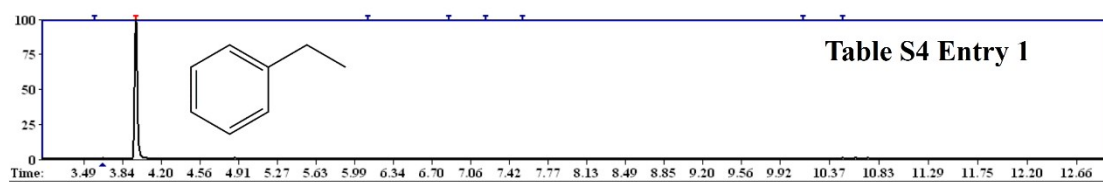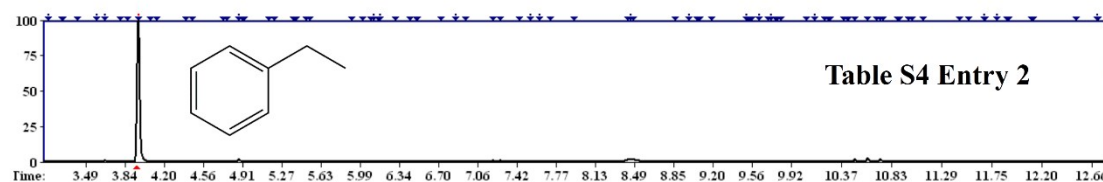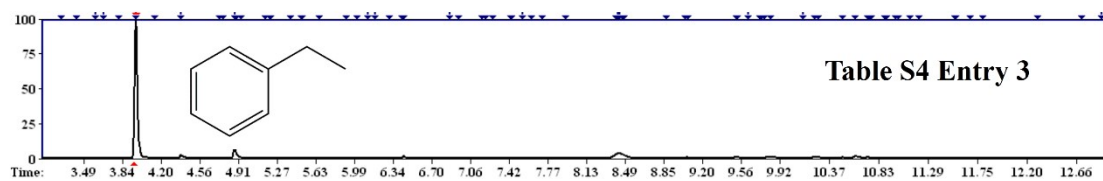

**Table S4.** Hydrogenation of styrene performed for 1 h using iridium nanosponge synthesized from different iridium precursors

| Entry | Styrene/catalyst | Catalyst                                     | Ratio of styrene to ethyl benzene <sup>a</sup> |
|-------|------------------|----------------------------------------------|------------------------------------------------|
| 1     | 2000             | Ir from H <sub>2</sub> IrCl <sub>6</sub>     | 53.6:46.4                                      |
| 3     | 2000             | Ir from IrCl <sub>3</sub> .xH <sub>2</sub> O | 53.9:46.1                                      |
| 5     | 2000             | Ir from [Ir(COD)Cl] <sub>2</sub>             | 53.4:46.4                                      |

All reactions were carried out at 4 bar hydrogen gas pressure and at 30 °C in CH<sub>2</sub>Cl<sub>2</sub> for 1 h; <sup>a</sup>conversion was determined by GC/MS analysis.

**Table S4** <sup>1</sup>H-NMR stack plot

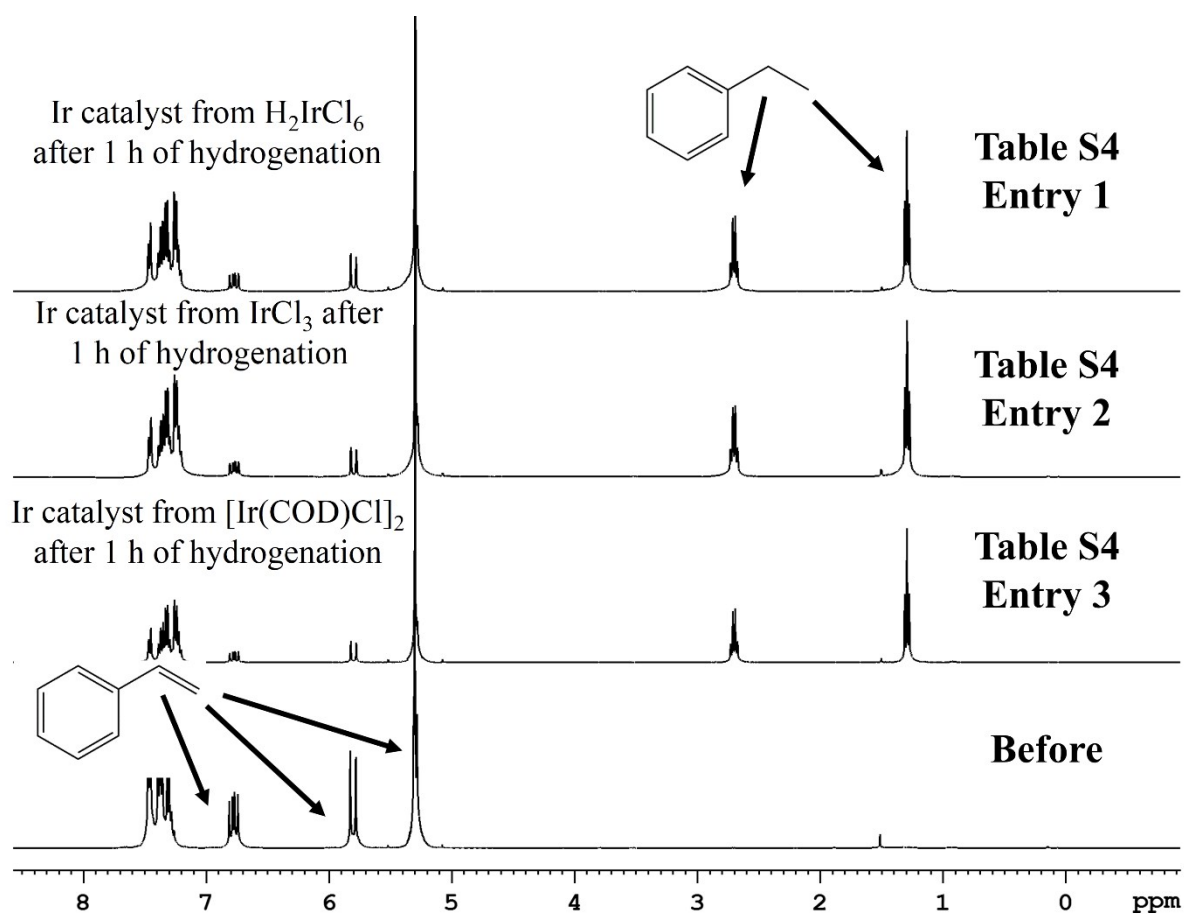

Table S4 GC stack plot

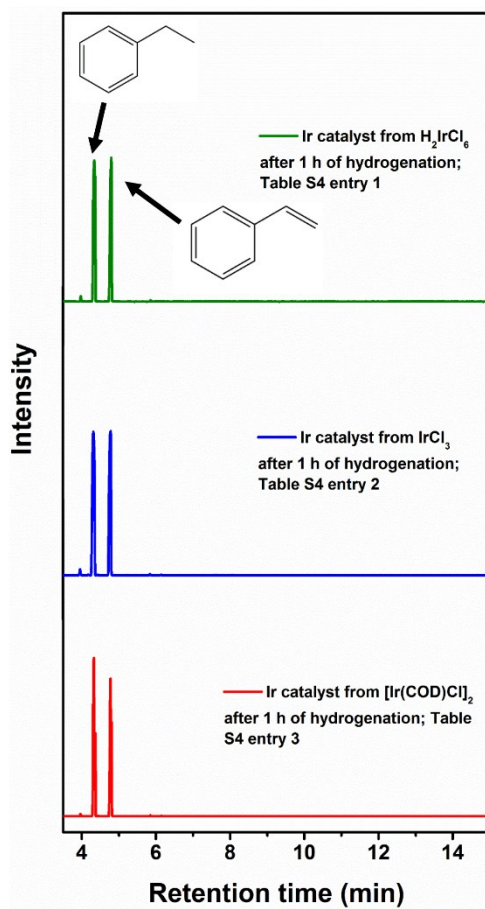

Supplement: c7dt01358b1.pdf [file c7dt01358b1.pdf]
